## 1 **Genomic underpinnings of lifespan allow prediction and reveal basis in modern risks**

2  
3 Paul RHJ Timmers<sup>a</sup>, Ninon Mounier<sup>b,c</sup>, Kristi Läll<sup>d,e</sup>, Krista Fischer<sup>d</sup>, Zheng Ning<sup>f</sup>, Xiao Feng<sup>g</sup>,  
4 Andrew Bretherick<sup>h</sup>, David W Clark<sup>a</sup>, eQTLGen Consortium<sup>1</sup>, Xia Shen<sup>a,f</sup>, Tõnu Esko<sup>d,i</sup>, Zoltán  
5 Kutalik<sup>b,c</sup>, James F Wilson<sup>a,h</sup>, Peter K Joshi<sup>a,b</sup>

6  
7 a) Centre for Global Health Research, Usher Institute of Population Health Sciences and  
8 Informatics, University of Edinburgh, Teviot Place, EH8 9AG Edinburgh, United Kingdom

9 b) Institute of Social and Preventive Medicine, University Hospital of Lausanne, 1010  
10 Lausanne, Switzerland

11 c) Swiss Institute of Bioinformatics, 1015 Lausanne, Switzerland

12 d) Estonian Genome Center, University of Tartu, 51010 Tartu, Estonia

13 e) Institute of Mathematics and Statistics, University of Tartu, 50409 Tartu, Estonia

14 f) Department of Medical Epidemiology and Biostatistics, Karolinska Institutet, SE-171 77  
15 Stockholm, Sweden

16 g) State Key Laboratory of Biocontrol, Guangdong Provincial Key Laboratory of Plant  
17 Resources, Key Laboratory of Biodiversity Dynamics and Conservation of Guangdong Higher  
18 Education Institutes, School of Life Sciences, Sun Yat-sen University, Guangzhou, China

19 h) MRC Human Genetics Unit, Institute of Genetics and Molecular Medicine, University of  
20 Edinburgh, Western General Hospital, Crewe Road, EH4 2XU Edinburgh, United Kingdom

21 i) Broad Inst of Harvard and MIT, Cambridge, 02142 MA, USA

22 1) See additional information

### 23 24 *Abstract*

25  
26  
27 We use a multi-stage genome-wide association of 1 million parental lifespans of genotyped  
28 subjects and data on mortality risk factors to validate previously unreplicated findings near  
29 *CDKN2B-AS1*, *ATXN2/BRAP*, *FURIN/FES*, *ZW10*, *PSORS1C3*, and 13q21.31, and identify  
30 and replicate novel findings near *GADD45G*, *KCNK3*, *LDLR*, *POM121C*, *ZC3HC1*, and *ABO*.  
31 We also validate previous findings near 5q33.3/*EBF1* and *FOXO3*, whilst finding contradictory  
32 evidence at other loci. Gene set and tissue-specific analyses show that expression in foetal  
33 brain cells and adult dorsolateral prefrontal cortex is enriched for lifespan variation, as are  
34 gene pathways involving lipid proteins and homeostasis, vesicle-mediated transport, and  
35 synaptic function. Individual genetic variants that increase dementia, cardiovascular disease,  
36 and lung cancer –but not other cancers– explain the most variance, possibly reflecting modern  
37 susceptibilities, whilst cancer may act through many rare variants, or the environment.  
38 Resultant polygenic scores predict a mean lifespan difference of around five years of life  
39 across the deciles.

40 *Introduction*

41

42 Human longevity is a highly complex trait, the product of myriad health, lifestyle, genetic, and  
43 environmental factors – alongside chance – and both individuals and society put much effort  
44 into its elongation. The extent to which lifespan can be explained by additive genetic variation  
45 in particular has been widely debated(1), with the most recent, and by far most well-powered  
46 study estimating heritability as 16.1% (SE = 0.4%)(2). Despite this modest heritability,  
47 extensive research, with some success, has gone into finding genetic variants influencing  
48 human survival, both in terms of age at death (3-6) and living to exceptional age (longevity)  
49 (6-12).

50

51 Studying the extremely long-lived, using a case-control design (7, 11-15) has the advantage  
52 of focusing on the truly remarkable, who also exhibit extreme healthspan and potentially  
53 unique genetic attributes (8, 16) whilst statistically focusing on those with most information,  
54 enhancing power at a given sample size, albeit from subjects that are hard to collect. However,  
55 although genome-wide association studies (GWAS) of mortality risk factors (such as  
56 cardiovascular traits and cancer) have had remarkable success (17-21), GWAS of longevity  
57 has proved more challenging, with only two robustly replicated, genome-wide significant  
58 associations (near *APOE*, *FOXO3*) having been made (7, 10).

59

60 This is a pity as understanding the effect of genetic variation on longevity or the overlapping  
61 but distinct (16) trait, lifespan, has the potential for fundamental understanding of the forces  
62 shaping how we age and our genome's evolution as well as translational benefits. This was  
63 recognised almost fifty years ago when Lewontin speculated on a potential study of ABO blood  
64 groups and lifespan(22). However, he also identified two major obstacles: hundreds of  
65 thousands of lives would have to be recruited and an approximate follow-up of 35 years would  
66 be required. Recent developments, in particular the creation of a five hundred thousand  
67 subject population cohort, UK Biobank (23), and the use of parental lifespans and offspring  
68 genotypes(3) – an extension of the Wacholder's kin-cohort method(24) – now enable  
69 researchers to discover genetic variants affecting survival from early middle age into the final  
70 decades of life without the long wait Lewontin prescribed, or the costly and often difficult  
71 recruitment of the extreme long-lived(7, 10, 15), albeit recognising the particular interest and  
72 statistical power of nonagenarians and centenarians.

73

74 The effectiveness of the kin-cohort approach was recently demonstrated by Pilling *et al.*(6),  
75 who increased the number of genome-wide significant associations with human survival from  
76 4 to 25. Although their study is a major step forward in mapping the genetic architecture of  
77 lifespan, the design did not allow effect sizes to be readily interpreted or meta-analysed (for  
78 example as hazard ratios or years of life), and the novel genetic variants were not replicated,  
79 due to lack of an independent dataset.

80

81 Here, we leverage data from UK Biobank to carry out a genome-wide association study  
82 (GWAS) of parental survival beyond age 40, extending previous research by providing intuitive  
83 effect sizes and seeking replication in 26 independent European-heritage population cohorts  
84 (the LifeGen consortium(5)), yielding a combined sample of over 1 million parental lifespans.  
85 We then further supplement this with data from 58 GWAS on mortality risk factors to conduct  
86 a Bayesian prior-informed GWAS (iGWAS) and attempt a second round of replication in  
87 publicly available longevity studies.

88

89 We also examine association of lifespan-altering variants with diseases of subjects and their  
90 kin within UK Biobank (PheWAS) and an independent dataset(25) to provide insight into how  
91 genetic variants act to shorten or prolong lifespan. Finally, we implicate specific genes,  
92 biological pathways, and cell types in human survival, and use our findings to create and test  
93 predictions of lifespan, which, in theory, could have been made at birth.

94 *Results*

95

96 **Genome-wide association analysis**

97

98 We carried out GWAS of survival in a discovery sample of 635,205 parents (68% deceased)  
99 of unambiguously British ancestry subjects from UK Biobank, and a replication sample of  
100 377,035 parents (47% deceased) of other European ancestry subjects from UK Biobank and  
101 26 additional populations cohorts (LifeGen; Table S1). In each sample, we performed a sex-  
102 stratified analysis and then combined the allelic effects in fathers and mothers into a single  
103 parental survival association in two ways. First, we assumed genetic variants with common  
104 effect sizes (CES) for both parents, maximising power if the effect is indeed the same,  
105 secondly, we allowed for potentially different effect sizes (PDES), maximising power to detect  
106 sexually dimorphic variants, including those only affecting one sex.

107

108 We find fourteen genomic regions containing SNPs with genome-wide significant ( $P < 5 \times 10^{-8}$ )  
109 association in the discovery cohort, for one or both analyses (Fig. 1a). Ten of these loci  
110 have been previously reported using similar data (6), but only 4 have been successfully  
111 replicated so far (3-5, 10). We calculate the effects of previously replicated SNPs to be  $-1.06$   
112 (near *APOE*),  $-0.42$  (*CHRNA3/5*),  $-0.76$  (*LPA*), and  $+0.56$  (*HLA-DQA1*) years of life gained  
113 per minor allele, estimated from the meta-analysis of discovery and replication cohorts. We  
114 also find evidence for replication ( $P < 0.05$ , one-sided test) for an additional 3 loci near  
115 *ATXN2/BRAP* ( $-0.28$ ), *FURIN/FES* ( $-0.25$ ), and *CDKN2B-AS1* ( $-0.25$ ), which were previously  
116 identified at genome-wide significance by Pilling et al(6) (Table 1).

117

118 While we were unable to replicate the remaining seven loci, this may be due to lack of power  
119 for SNPs at or near 13q21.33 and *C20orf187*, where 95% confidence intervals (CIs) for  
120 replication effect overlap with both discovery effect CIs and zero. Conversely, lead SNPs near  
121 *CELSR2/PSRC1*, *ARPC1*, *CLU*, *GADD45G*, and *CHRNA4* do not appear to replicate due to  
122 small observed effects in the replication cohort rather than power (discovery and replication  
123 95% CIs do not overlap and replication CI covers zero; ;Fig. 2a).

124

125 Meta-analysis of our discovery and replication cohorts, totalling 1,012,240 parental lifespans,  
126 increased power further, with the P value for the lead SNP near *APOE* falling to  $1.83 \times 10^{-85}$ .  
127 The analysis reveals 11 additional genome-wide significant loci at or near the following genes  
128 (and increase in lifespan per minor allele): *MAGI3* ( $-0.32$ ), *TMEM18* ( $+0.28$ ), *KCNK3* ( $-0.26$ ),  
129 *HTT* ( $+0.23$ ), *CHW43* ( $-0.27$ ), *HIST1* ( $+0.22$ ), *IGF2R* ( $-0.91$ ), *HP* ( $-0.28$ ), *BECN1* ( $-0.34$ ),  
130 *LDLR* ( $+0.36$ ), and *LAMA5* ( $+0.25$ ) (Table 1, Fig. 1b).

131

132 The combined analysis has at least 50% power at genome-wide significance to detect any  
133 association between lifespan and frequent genetic variants ( $MAF > 0.3$ ) with effect sizes of  
134 0.25 years of life per minor allele or more, or common genetic variants ( $MAF > 0.1$ ) with effect  
135 sizes of 0.56 years of life per minor allele or more.

136 **Fig. 1: SNP associations with lifespan from the discovery cohort and discovery and**  
 137 **replication meta-analysis cohorts, under common and potentially different**  
 138 **assumptions of effects across sexes**

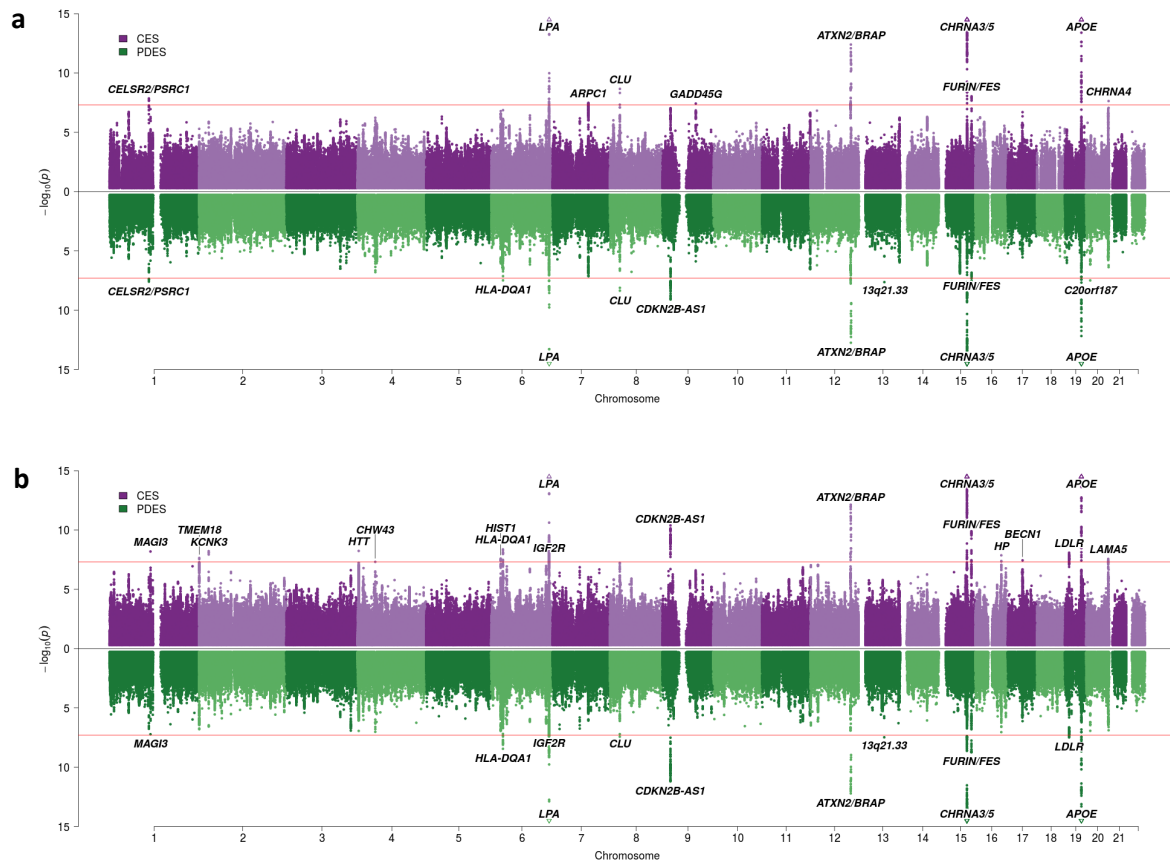

139  
 140 *(a) GWAS of UK Biobank discovery cohort, (b) GWAS of discovery and replication cohorts combined.*  
 141 *In purple are the associations under the assumption of common SNP effects across sexes (CES); in*  
 142 *green are the associations under the assumption of potentially different effects between sexes (PDES).*  
 143 *P refers to the two-sided P values for association of allelic dosage on survival under the residualised*  
 144 *Cox model. Annotated are the gene, cluster of genes, or cytogenetic band near the top SNP. The red*  
 145 *line represents the genome-wide significance threshold ( $P = 5 \times 10^{-8}$ ). P values have been capped at  $-\log_{10}(p) = 15$  to better visualise associations close to genome-wide significance. SNPs with P values*  
 146 *beyond this cap (near APOE, CHRNA3/5 and LPA) are represented by triangles.*  
 147  
 148

149  
150  
151  
152

**Fig. 2 Validation of SNPs identified in our own and other studies using independent samples of European descent.**

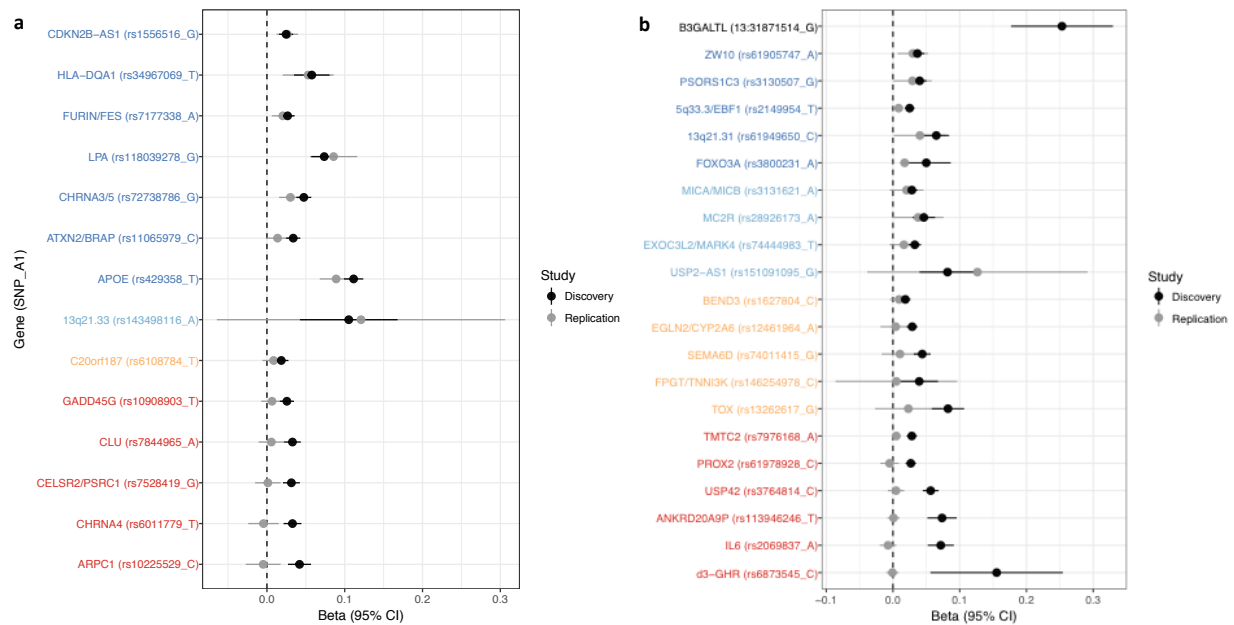

153  
154  
155  
156  
157  
158  
159  
160  
161  
162  
163  
164  
165  
166  
167  
168  
169

Comparison of (inferred) effect sizes between discovery and replication cohorts. Panel A has discovery estimates taken from our own UKB Gen. British sample and replication estimates from the combined LifeGen + UKB European descent samples, other than those in discovery. Panel B has (sex-specific) discovery estimates inferred from other studies (6, 11-13, 15, 26) (see Methods and Table S3) and replication estimates from either LifeGen – to replicate Pilling et al. (6) – or the full dataset from Panel A (UKB discovery + replication combined). Gene names are as reported by discovery, and have been coloured based on overlap between confidence intervals (CIs) of effect estimates. Note, rs151091095 near USP2-AS1 is a proxy ( $r^2 = 1.00$ ) for rs139137459, the SNP reported by Pilling et al; rs113946246 near ANKRD20A9P is a proxy ( $r^2 = 0.97$ ) for rs2440012, the SNP reported by Zeng et al; no proxies could be found for 13:31871514\_T\_G. Dark blue – Nominal replication ( $P < 0.05$ , one-sided test). Light blue – CIs overlap ( $P_{\text{different}} > 0.05$ ) and cover zero, but replication estimate is closer to discovery than zero. Yellow – CIs overlap ( $P_{\text{different}} > 0.05$ ) and cover zero, and replication estimate is closer to zero than discovery. Red – CIs do not overlap ( $P_{\text{different}} < 0.05$ ) and replication estimate covers zero. Gene – Nearby gene(s) as reported by discovery. SNP – rsID of SNP or proxy. A1 – Lifespan-increasing allele. Beta - the estimated  $\log_e(\text{protection ratio})$  for one copy of the effect allele. CI – Confidence Interval.

170  
171  
172

**Table 1: Twenty-nine genome-wide significant associations with lifespan in discovery, discovery and replication meta-analysis, or iGWAS**

| rsID               | At or near          | Chr       | Position         | A1       | Freq1       | Beta1         | SE            | Years       | CES P          | PDES P         | iGWAS P            | R | S | L |
|--------------------|---------------------|-----------|------------------|----------|-------------|---------------|---------------|-------------|----------------|----------------|--------------------|---|---|---|
| <b>rs7528419</b>   | <b>CELSR2/PSRC1</b> | <b>1</b>  | <b>109817192</b> | <b>G</b> | <b>0.22</b> | <b>0.0314</b> | <b>0.0055</b> | <b>0.31</b> | <b>1.4E-08</b> | <b>2.6E-08</b> | <b>1.7E-09</b>     |   | ✓ |   |
| <b>rs34967069</b>  | <b>HLA-DQA1</b>     | <b>6</b>  | <b>32591248</b>  | <b>T</b> | <b>0.05</b> | <b>0.0577</b> | <b>0.0117</b> | <b>0.58</b> | <b>7.5E-07</b> | <b>3.3E-08</b> |                    | ✓ |   |   |
| <b>rs118039278</b> | <b>LPA</b>          | <b>6</b>  | <b>160985526</b> | <b>G</b> | <b>0.92</b> | <b>0.0737</b> | <b>0.0085</b> | <b>0.74</b> | <b>4.0E-18</b> | <b>3.7E-18</b> | <b>&lt;1.5E-10</b> | ✓ | ✓ | ✓ |
| rs10225529         | ARPC1               | 7         | 98963155         | C        | 0.10        | 0.0419        | 0.0076        | 0.42        | 3.2E-08        | 2.4E-07        | 1.4E-05            |   |   |   |
| <b>rs7844965</b>   | <b>CLU</b>          | <b>8</b>  | <b>27442064</b>  | <b>A</b> | <b>0.23</b> | <b>0.0328</b> | <b>0.0055</b> | <b>0.33</b> | <b>2.2E-09</b> | <b>4.4E-09</b> | <b>4.1E-08</b>     |   | ✓ |   |
| <b>rs1556516</b>   | <b>CDKN2B-AS1</b>   | <b>9</b>  | <b>22100176</b>  | <b>G</b> | <b>0.50</b> | <b>0.0246</b> | <b>0.0046</b> | <b>0.25</b> | <b>9.1E-08</b> | <b>8.0E-10</b> | <b>&lt;1.5E-10</b> | ✓ | ✓ | ✓ |
| <b>rs10908903</b>  | <b>GADD45G</b>      | <b>9</b>  | <b>92228559</b>  | <b>T</b> | <b>0.53</b> | <b>0.0256</b> | <b>0.0047</b> | <b>0.26</b> | <b>3.7E-08</b> | <b>1.3E-06</b> | <b>3.5E-07</b>     |   |   | ✓ |
| <b>rs11065979</b>  | <b>ATXN2/BRAP</b>   | <b>12</b> | <b>112059557</b> | <b>C</b> | <b>0.56</b> | <b>0.0338</b> | <b>0.0047</b> | <b>0.34</b> | <b>3.9E-13</b> | <b>1.8E-13</b> |                    | ✓ |   | ✓ |
| rs143498116        | 13q21.33            | 13        | 71286100         | A        | 0.99        | 0.1052        | 0.0320        | 1.05        | 0.0010         | 2.4E-08        |                    |   |   |   |
| <b>rs72738786</b>  | <b>CHRNA3/5</b>     | <b>15</b> | <b>78828086</b>  | <b>G</b> | <b>0.67</b> | <b>0.0474</b> | <b>0.0049</b> | <b>0.47</b> | <b>3.0E-22</b> | <b>6.0E-26</b> | <b>&lt;1.5E-10</b> | ✓ | ✓ |   |
| <b>rs7177338</b>   | <b>FURIN/FES</b>    | <b>15</b> | <b>91428636</b>  | <b>A</b> | <b>0.53</b> | <b>0.0266</b> | <b>0.0046</b> | <b>0.27</b> | <b>9.1E-09</b> | <b>6.9E-08</b> | <b>2.3E-09</b>     | ✓ |   | ✓ |
| <b>rs429358</b>    | <b>APOE</b>         | <b>19</b> | <b>45411941</b>  | <b>T</b> | <b>0.84</b> | <b>0.1114</b> | <b>0.0063</b> | <b>1.11</b> | <b>9.4E-69</b> | <b>8.8E-71</b> | <b>&lt;1.5E-10</b> | ✓ | ✓ | ✓ |
| rs6108784          | C20orf187           | 20        | 10964366         | T        | 0.59        | 0.0185        | 0.0047        | 0.18        | 8.5E-05        | 3.3E-08        | 8.5E-05            |   |   |   |
| rs6011779          | CHRNA4              | 20        | 61984317         | T        | 0.81        | 0.0328        | 0.0059        | 0.33        | 2.3E-08        | 6.2E-07        | 4.6E-06            |   |   |   |
| rs1230666          | MAGI3               | 1         | 114173410        | G        | 0.85        | 0.0322        | 0.0056        | 0.32        | 6.4E-09        | 6.1E-08        | 7.9E-09            |   |   |   |
| <b>rs66906321</b>  | <b>TMEM18</b>       | <b>2</b>  | <b>630070</b>    | <b>T</b> | <b>0.18</b> | <b>0.0285</b> | <b>0.0051</b> | <b>0.28</b> | <b>2.3E-08</b> | <b>1.9E-07</b> | <b>7.0E-10</b>     |   | ✓ |   |
| <b>rs1275922</b>   | <b>KCNK3</b>        | <b>2</b>  | <b>26932887</b>  | <b>G</b> | <b>0.75</b> | <b>0.0258</b> | <b>0.0044</b> | <b>0.26</b> | <b>6.0E-09</b> | <b>2.7E-07</b> | <b>8.4E-10</b>     |   | ✓ | ✓ |
| <b>rs61348208</b>  | <b>HTT</b>          | <b>4</b>  | <b>3089564</b>   | <b>T</b> | <b>0.40</b> | <b>0.0230</b> | <b>0.0039</b> | <b>0.23</b> | <b>5.8E-09</b> | <b>1.2E-07</b> | <b>8.4E-10</b>     |   | ✓ |   |
| rs28971796         | CHW43               | 4         | 49151982         | G        | 0.62        | 0.0272        | 0.0050        | 0.27        | 4.8E-08        | 9.6E-08        |                    |   |   |   |
| rs9393691          | HIST1               | 6         | 26272829         | C        | 0.36        | 0.0223        | 0.0040        | 0.22        | 2.5E-08        | 1.1E-07        |                    |   |   |   |
| rs144078421        | IGF2R               | 6         | 160424890        | G        | 0.98        | 0.0905        | 0.0161        | 0.91        | 2.1E-08        | 6.7E-08        | 2.8E-08            |   |   |   |
| <b>rs12924886</b>  | <b>HP</b>           | <b>16</b> | <b>72075593</b>  | <b>A</b> | <b>0.81</b> | <b>0.0280</b> | <b>0.0049</b> | <b>0.28</b> | <b>1.4E-08</b> | <b>9.1E-08</b> | <b>7.0E-10</b>     |   | ✓ |   |
| rs1011157          | BECN1               | 17        | 40960253         | C        | 0.88        | 0.0339        | 0.0061        | 0.34        | 3.6E-08        | 7.7E-07        | 4.4E-08            |   |   |   |
| <b>rs142158911</b> | <b>LDLR</b>         | <b>19</b> | <b>11190534</b>  | <b>A</b> | <b>0.12</b> | <b>0.0355</b> | <b>0.0062</b> | <b>0.36</b> | <b>8.1E-09</b> | <b>3.3E-08</b> | <b>2.8E-10</b>     |   | ✓ | ✓ |
| rs13037253         | LAMA5               | 20        | 60928724         | A        | 0.27        | 0.0249        | 0.0045        | 0.25        | 2.7E-08        | 3.6E-07        | 3.4E-08            |   |   |   |
| rs10211471         | AC079135.1          | 2         | 237081854        | C        | 0.81        | 0.0240        | 0.0049        | 0.24        | 1.1E-06        | 1.7E-05        | 2.3E-08            |   |   |   |
| <b>rs113160991</b> | <b>POM121C</b>      | <b>7</b>  | <b>75094329</b>  | <b>G</b> | <b>0.78</b> | <b>0.0254</b> | <b>0.0049</b> | <b>0.25</b> | <b>2.8E-07</b> | <b>3.5E-07</b> | <b>7.5E-09</b>     |   | ✓ |   |
| <b>rs56179563</b>  | <b>ZC3HC1</b>       | <b>7</b>  | <b>129685597</b> | <b>A</b> | <b>0.39</b> | <b>0.0211</b> | <b>0.0041</b> | <b>0.21</b> | <b>2.1E-07</b> | <b>6.2E-06</b> | <b>5.6E-09</b>     |   | ✓ |   |
| <b>rs2519093</b>   | <b>ABO</b>          | <b>9</b>  | <b>136141870</b> | <b>C</b> | <b>0.81</b> | <b>0.0224</b> | <b>0.0050</b> | <b>0.22</b> | <b>6.3E-06</b> | <b>4.1E-06</b> | <b>1.9E-08</b>     |   | ✓ |   |

173  
174

175 *Top section contains SNPs reaching genome-wide significance in the discovery cohort, middle section*  
 176 *contains SNPs reaching genome-wide significance in the meta-analysis of discovery and replication*  
 177 *cohorts, bottom section contains additional SNPs reaching genome-wide significance in iGWAS. At or*  
 178 *near – Gene, cluster of genes, or cytogenetic band in close proximity to lead SNP; Chr – Chromosome;*  
 179 *Position – Base-pair position on chromosome (GRCh37); A1 – the effect allele, increasing lifespan;*  
 180 *Freq1 – Frequency of the A1 allele; Beta1 – the log<sub>e</sub>(protection ratio) for carrying one copy of A1 under*  
 181 *an additive dosage model which multiplied observed offspring genotype on parent effect by 2. For the*  
 182 *top section, this is the effect reported in the discovery cohort, for the other two sections, this is the effect*  
 183 *reported in the combined cohort; SE – Standard Error; Years – Years of life gained for a carrying one*  
 184 *copy of the A1 allele; CES – Assumption of common effect size of A1 across sexes; PDES –Allowing*  
 185 *for potentially different effect sizes of A1 across sexes; P – For the top section, the P value for the Wald*  
 186 *test of association between imputed dosage and cox model residual in the discovery cohort. For the*  
 187 *other sections, the same P value of the Wald test for the combined cohort; iGWAS P – The permutation*  
 188 *P value of Bayes Factors against 7.2 billion null Bayes Factor distributions, hence limited to a minimum*  
 189 *value of 1.4E-10; R – Replication P < 0.05 (CES one sided test, PDES two-sided test); S – Strengthened*  
 190 *by iGWAS, i.e. iGWAS P value is lower than CES P value in the combined cohort or reaches minimum;*  
 191 *L – associates with longevity (P<0.05, one-sided test) in external longevity studies. SNPs which*  
 192 *replicate (lifespan or longevity) or gain additional support under iGWAS are in bold;. Grey – not*  
 193 *applicable; for iGWAS this means the SNP was not included, for R (replication) this is not relevant*  
 194 *when the replication data is used in discovery, S (iGWAS strengthening) as per iGWAS, L (longevity)*  
 195 *– SNP or proxy not available in external dataset.*

196 We used the combined cohort to test six candidate SNPs previously reported at genome-wide  
197 significance to associate with longevity (11, 12, 15, 27) for association with lifespan. We find  
198 directionally consistent evidence of association ( $P < 0.05$ , one-sided test) for rs3800231 near  
199 *FOXO3* (+0.175) and rs2149954 near 5q33.3/*EBF1* (+0.085) but find no effect on lifespan for  
200 SNPs near *IL6*, *ANKRD20A9P*, *USP42*, and *TMTC2*. We also tested a deletion, *d3-GHR*,  
201 reported to affect male lifespan by 10 years when homozygous(26), having converted the  
202 recessive effect into an expected apparent effect in our study for a truly recessive allele, but  
203 find no evidence of association with lifespan in our own male sample (Table S3;Fig. 2b).

204  
205 We next attempted to validate additional survival SNPs found by Pilling *et al.*(6) using the  
206 independent replication cohort, LifeGen. We find evidence for replication ( $P < 0.05$ , one-sided  
207 test) for female-specific SNPs near *PSORS1C3* (−0.29 years per minor allele in LifeGen) and  
208 an intergenic region within 13q21.31 (+0.40), as well as one male-specific SNP near *ZW10* (−  
209 0.30). The remaining 10 SNPs for which LifeGen statistics were available did not replicate,  
210 primarily due to lack of power (95% CIs for LifeGen effect size overlap with both estimated  
211 discovery effect and zero), except for *PROX2*, where our independent result is not consistent  
212 with Pilling *et al.*'s discovery (95% CIs for effect estimates do not overlap and LifeGen CI  
213 covers zero) (Table S3; ;Fig. 2b).

214

### 215 Mortality risk factor-informed GWAS (iGWAS)

216

217 We integrated 58 publicly available GWAS on mortality risk factors with our combined sample  
218 GWAS, creating Bayesian priors for each lifespan SNP effect based on causal effect estimates  
219 of independent risk factors on lifespan. This reveals an additional 4 genome-wide significant  
220 associations with lifespan (permutation  $P < 5 \times 10^{-8}$ ) near *AC079135.1* (−0.24), *POM121C* (−  
221 0.25), *ZC3HC1* (+0.21) and *ABO* (−0.22) (Fig. 3, Table S10) where reported effects in brackets  
222 represent additional years of life per minor allele in the standard GWAS. A total of 82  
223 independent SNPs associate with lifespan when allowing for a 1% false discovery rate (FDR)  
224 (Table S10).

225

226 **Fig. 3 Manhattan plot of Bayesian associations of SNPs informed by risk factors with**  
227 **parental lifespan under the CES assumption**

228

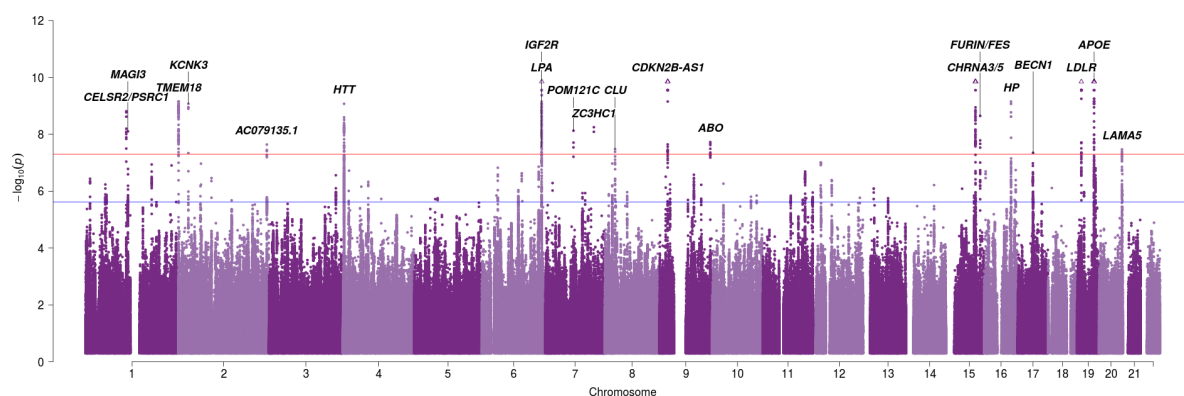

229

230

231 Bayesian iGWAS was performed using observed associations from the CES GWAS (discovery and  
232 replication sample combined) and priors based on 16 traits selected by an AIC-based stepwise model.  
233 As the  $P$  values were assigned empirically using a permutation approach, the minimum  $P$  value is  
234 limited by the number of permutations; SNPs reaching this limit are represented by triangles. Annotated  
235 are the gene, cluster of genes, or cytogenetic band in close proximity to the top SNP. The red line  
236 represents the genome-wide significance threshold ( $P = 5 \times 10^{-8}$ ). The blue line represents the 1% FDR  
237 threshold.

238  
239  
240  
241  
242  
243  
244  
245  
246  
247  
248  
249  
250  
251  
252  
253  
254  
255

Notably, 8 out of the 11 lead SNPs in discovery (for which we also had iGWAS data) show consistent evidence between replication and iGWAS (i.e. both weakened or strengthened the evidence together; Table 1).

We attempted to replicate the new hits and the rest of our genome-wide significant findings using publicly available summary statistics on extreme longevity (10, 15, 28), despite limited power. Remarkably, 23 out of 28 SNPs show directional consistency, and 9 SNPs or close proxies ( $r^2 > 0.8$ ) reach nominal significance in the replication sample ( $P < 0.05$ , one-sided test). Of these, SNPs near *ZC3HC1*, *ABO*, *GADD45G*, *LDLR*, *POM121C*, and *KCNK3* are replicated for the first time (Table S11), and thus appear to be lifespan and longevity SNPs. The overall, meta-analysed ratio of replication effect to discovery effect size – excluding *APOE*, which was predetermined as 1 to enable calibrations – is 0.37 (95% CI 0.26–0.48;  $P = 1.5 \times 10^{-11}$ ), indicating that most of our lead lifespan SNPs are also longevity SNPs (i.e. the overall ratio is not zero; Fig. 4), but have an even greater effect on lifespan than longevity (relative to *APOE*).



256  
257  
258

**Fig. 4 6 SNPs replicated for first time using 3 external GWAMAs of extreme long-livedness, whilst 23/28 show directional consistency.**

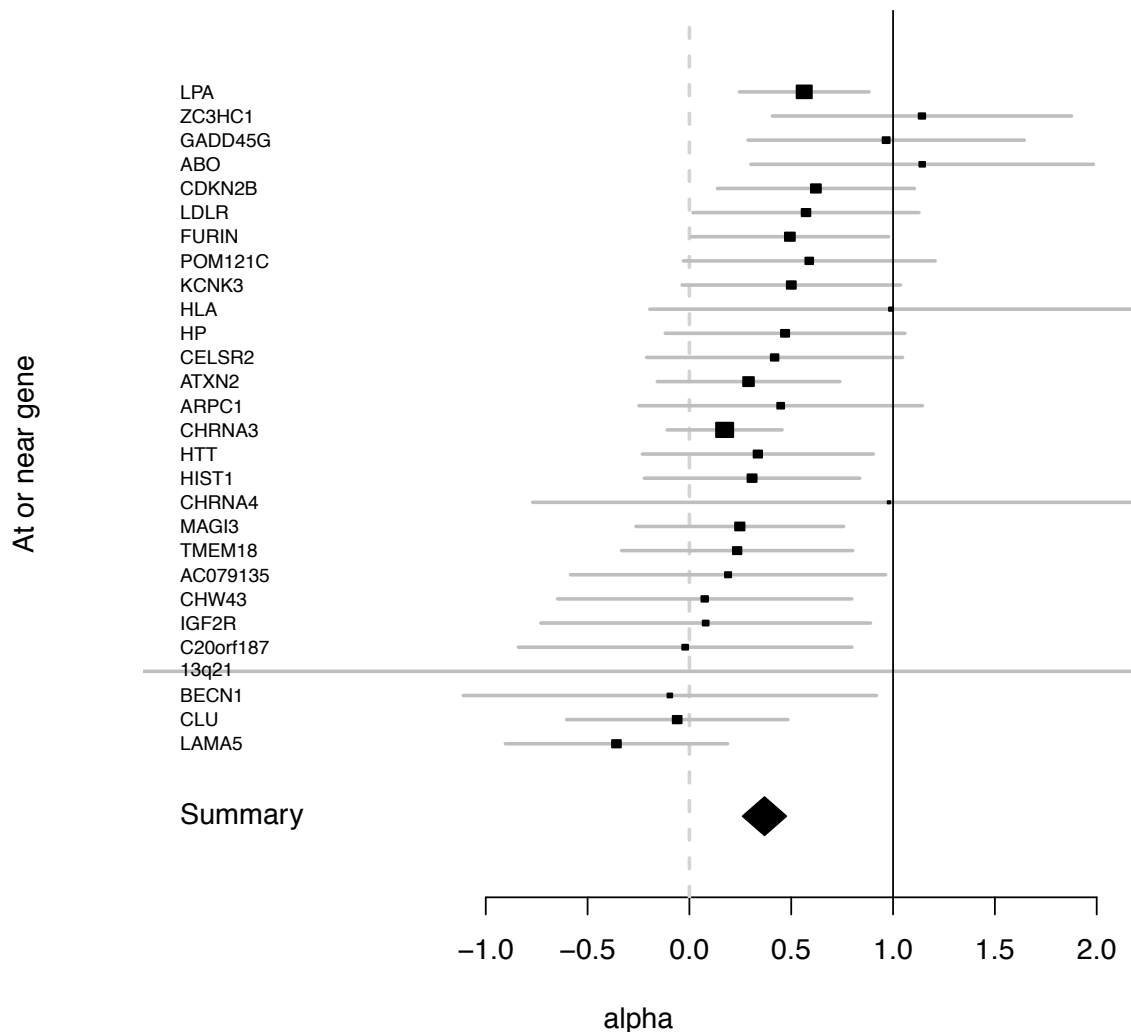

259  
260

261 *We attempted replicate the observed effect sizes for log hazard protection ratio in external GWAMAs*  
 262 *of longevity (10, 15, 28),, having converted effect sizes to our scale (see Methods). At or near gene –*  
 263 *the nearest gene to the lead SNP analysed (see Table S11). Alpha – ratio of replication to discovery*  
 264 *effect sizes on the common scale and 95% CI (reflecting uncertainty in the numerator and denominator).*  
 265 *A one-sided test was used for significance (nominal  $p < .05$ ). A ratio of 1 indicates consistency with the*  
 266 *relationship between the effect on 90+ longevity and lifetime hazard with that at APOE, a ratio of zero*  
 267 *suggests no effect on replication. True (rather than estimated) alpha between 0 and 1 suggests the SNP*  
 268 *has a greater effect on lifetime hazard than 90+ longevity, relative to APOE. SNPs where both 0 and 1*  
 269 *are covered are underpowered, although the result may be suggestive. APOE as the reference SNP*  
 270 *(and thus, by definition,  $\alpha = 1$ ) is excluded. The summary is the inverse variance meta-analysis of*  
 271 *alpha over all SNPs 0.37 95% CI ( 0.26,0.48 )  $p < 1e-13$  for  $H_0 \alpha < > 0$ .*

272

### Sex- and age-specific effects

273  
274

275 We estimated SNP effects stratified by sex and age bands to identify age- and sex-specific  
 276 effects. Although power was limited, as we sought contrasts in small effect sizes, we find 6  
 277 variants with age-specific effects on survival and 4 variants with sex-specific effects on survival  
 278 (FDR 5% across the 49 putative lifespan and longevity variants considered). The lead variant  
 279 at *APOE* shows stronger effects at older ages – the  $\epsilon 4$  allele's log hazard is about 2.5 times  
 280 as strong in individuals in their 80s vs. 60s – whilst lead SNPs near *CLU*, *CHRNA3/5*, *ABO*,  
 281 *CDKN2B-AS1*, and *EGLN2/CYP2A6*, show stronger effects at younger ages (Fig. 5a).  
 282 Variants at or near 13q21.33 and *PSORS1C3* show stronger effects in women, while variants  
 283 at or near *TOX* and *C20orf187* show stronger effects in men (Fig. 5b). Notably, the SNP at or  
 284 near *ZW10*, which was identified by Pilling et al. (6) in men only and replicated by us in men,  
 285 does not actually show statistically significant evidence of sex-specificity in our UK Biobank  
 286 analysis (95% CI  $\beta_{\text{male}}$  -0.009 to 0.033;  $P = 0.266$ ), although this could be due to lack of power  
 287 (Table S20, Table S21).  
 288

289 **Fig. 5 Age and sex specific effects on parent survival for 10 variants showing 5% FDR**  
 290 **age- or sex-specificity of effect size from 49 lifespan-increasing variants**  
 291

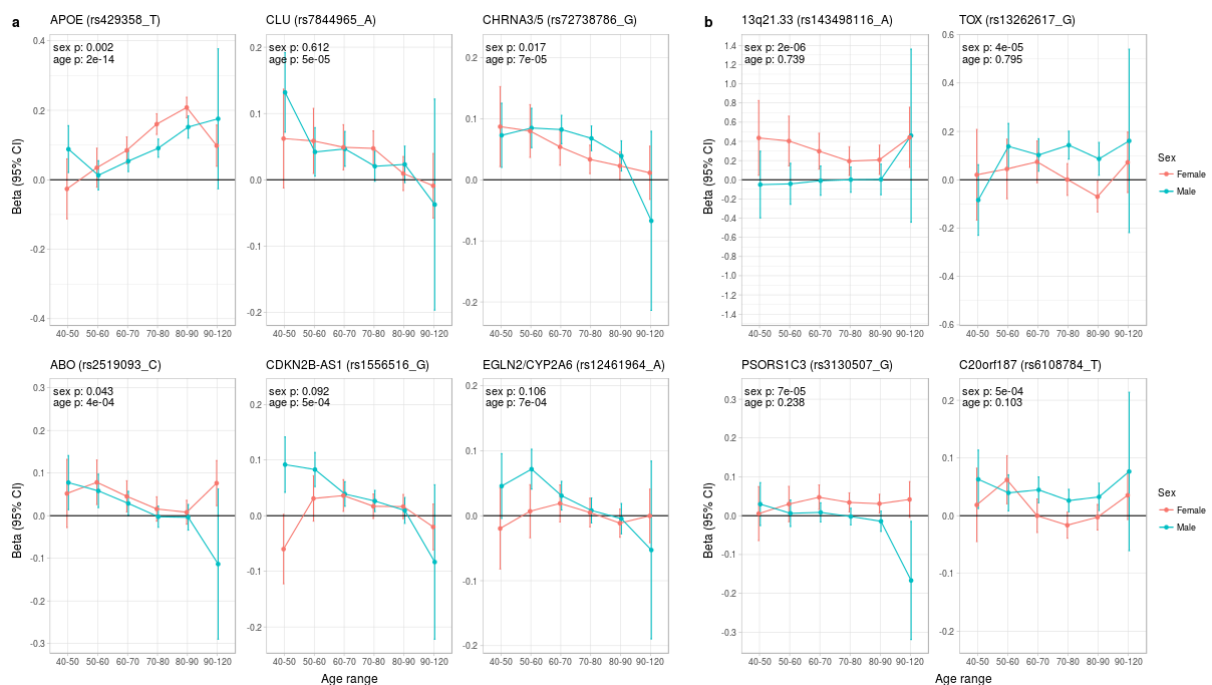

292  
 293

294 *a) Variants showing age-specific effects; b) Variants showing sex-specific effects. Panel titles show the*  
 295 *gene, cluster of genes, or cytogenetic band in close proximity to the lead lifespan variant, with this*  
 296 *variant and lifespan-increasing allele in parentheses. Beta –  $\log_e(\text{protection ratio})$  for 1 copy of effect*  
 297 *allele in self in the age band (i.e. 2 x observed due to 50% kinship). Note the varying scale of y-axis*  
 298 *across panels. Age range: the range of ages over which beta was estimated. Sex p – nominal P value*  
 299 *for association of effect size with sex. Age p – nominal P value for association of effect size with age.*  
 300

### 301 Implication of causal genes and methylation sites

302  
 303 Combining gene expression and methylation data with our lifespan statistics, we identify  
 304 causal roles for *FURIN* and *FES* within the *FURIN/FES* locus, *SH2B3* within the  
 305 *ATXN2/BRAP* locus, and *SEN1* within the *FOXO3* locus. We also find causal CpG sites  
 306 near *APOE*, *CHRNA3/5*, *HLA-DQA1*, *LPA*, *ATXN2/BRAP*, and 10 other loci at FDR 5%. (

307 SI Appendix - section 1, Table S12, Table S13).

308

309 We performed conditional analysis on lead lifespan loci to find additional independent variants  
310 associated with lifespan. This increases out-of-sample predicted narrow-sense heritability by  
311 79% (Table S14). As might be expected, *HLA-DQA1* appears to have high allelic  
312 heterogeneity, where at least 29 additional variants showed independent predictive causal  
313 effects, unable to be captured by only the top variant in the LD block.

314

315

### 316 **Disease and lifespan**

317

318 We next sought to validate and understand how lifespan variants are linked to age-related  
319 disease by testing for disease association in UK Biobank and independently in PhenoScanner  
320 (25), recognizing in the former false positive associations with death might coincide with false  
321 positive associations with disease given the correlation between morbidity and mortality.

322

323 In UK Biobank, we find the lifespan-lengthening variants are protective against disease in 104  
324 tests, but increase risk in 16 tests (at 5% FDR). Strikingly, the lifespan-lengthening variants  
325 are protective for cardiovascular disease (CVD) in 67 association tests and increased  
326 susceptibility only once (near *APOE*, although this SNP also shows two protective CVD  
327 associations, and is well known to be highly pleiotropic). For cancer, we see only 14 protective  
328 associations, all but four of which are related to lung cancer (SI Appendix - section 2, Table  
329 S6, Table S17). PhenoScanner associations are similar in character or even more pronounced  
330 (Table S7, Table S18).

331

332 Nonetheless, both analyses were subject to bias due to the structure of the sample as the  
333 numbers of disease cases (and thus power) differs by disease, a potential confounder, with  
334 cancer having been less studied and more heterogeneous than CVD. We therefore  
335 approached the question again, from the opposite end, identifying the most important loci for  
336 each disease category (neurological disease, CVD, diabetes, lung cancer, and other cancers)  
337 in large numbers (>20 associations in each category) from the GWAS catalog (29) and used  
338 our GWAS to see if the disease loci associate with lifespan. Our measure was lifespan  
339 variance explained (LVE, years<sup>2</sup>) by the locus, which balances effect size against frequency,  
340 and is proportional to selection response and the GWAS test statistic and thus monotonic for  
341 risk of false positive lifespan associations. Taking each independent disease variant, we  
342 ordered them by LVE, excluding any secondary disease where the locus was pleiotropic.

343

344 The Alzheimer's disease locus *APOE* shows the largest LVE (0.23 years<sup>2</sup>), consistent with its  
345 most frequent discovery as a lifespan SNP in GWAS(3, 6, 7, 15). Of the 20 largest LVE SNPs,  
346 12 and 4 associate with CVD and smoking/lung cancer, respectively, while only 2 associate  
347 with other cancers (near *ZW10* and *NRG1*; neither in the top 15 LVE SNPs). Cumulatively,  
348 the top 20/45 LVE SNPs explain 0.33/0.43 years<sup>2</sup> through CVD, 0.13/0.15 years<sup>2</sup> through  
349 smoking and lung cancer, and 0.03/0.11 years<sup>2</sup> through other cancers (Fig. 6).

350 **Fig. 6: Disease loci explaining the most lifespan variance are primarily associated with**  
351 **neurological disease, cardiovascular disease, and lung cancer.**  
352

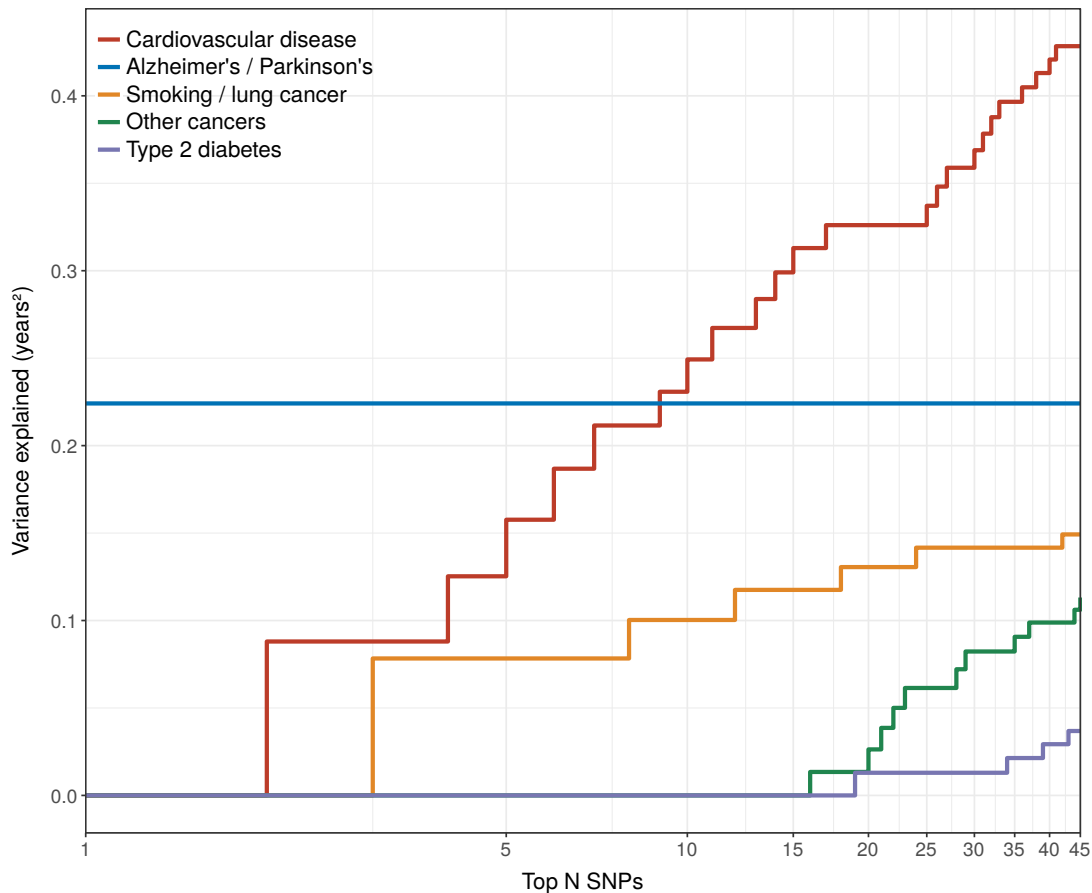

353 *SNPs reported as genome-wide significant for disease in European population studies, ordered by their*  
354 *lifespan variance explained (LVE), show the cumulative effect of disease SNPs on variation in lifespan.*  
355 *An FDR cut-off of 1.55% is applied simultaneously across all diseases, allowing for 1 false positive*  
356 *association with lifespan among the 45 independent loci. Note the log scale on the X axis.*  
357 *Cardiovascular disease – SNPs associated with cardiovascular disease or myocardial*  
358 *infarction. Alzheimer's / Parkinson's – SNPs associated with Alzheimer's disease or Parkinson's*  
359 *disease. Smoking / lung cancer – SNPs associated with smoking behaviour, chronic obstructive*  
360 *pulmonary disease and lung adenocarcinomas. Other cancers – SNPs associated with cancers other*  
361 *than lung cancer (see Table S19 for a full list). Type 2 diabetes – SNPs associated with type 2 diabetes.*  
362

363 Strikingly, two of the three largest LVE loci for non-lung cancers (at or near *ATXN2/BRAP* and  
364 *CDKN2B-AS1*), show **increased** cancer associating with **decreased** lifespan (due to  
365 antagonistic pleiotropy with CVD), while the third (at or near *MAGI3*) also shows evidence of  
366 pleiotropy, having an association with CVD three times as strong as breast cancer, and in the  
367 same direction. In addition, 6 out of the 11 remaining cancer-increasing/lifespan-decreasing  
368 loci passing FDR (near *ZW10*, *NRG1*, *C6orf106*, *HNF1A*, *C20orf187*, and *ABO*) also show  
369 significant associations with CVD but could not be tested for pleiotropy as we did not have  
370 data on the relative strength of association of every type of cancer against CVD, and thus  
371 (conservatively from the point of view of our conclusion) remain counted as cancer SNPs (Fig.  
372 7, Table S19). Visual inspection also reveals an interesting pattern in the SNPs that did not  
373 pass FDR correction for affecting lifespan: cardio-protective variants associate almost  
374 exclusively with increased lifespan, while cancer-protective variants appear to associate with  
375 lifespan in either direction (grey dots often appear below the x axis for other cancers).  
376

377 **Fig. 7 Lifespan variance explained by individual genome-wide significant disease SNPs**  
 378 **within disease categories.**  
 379

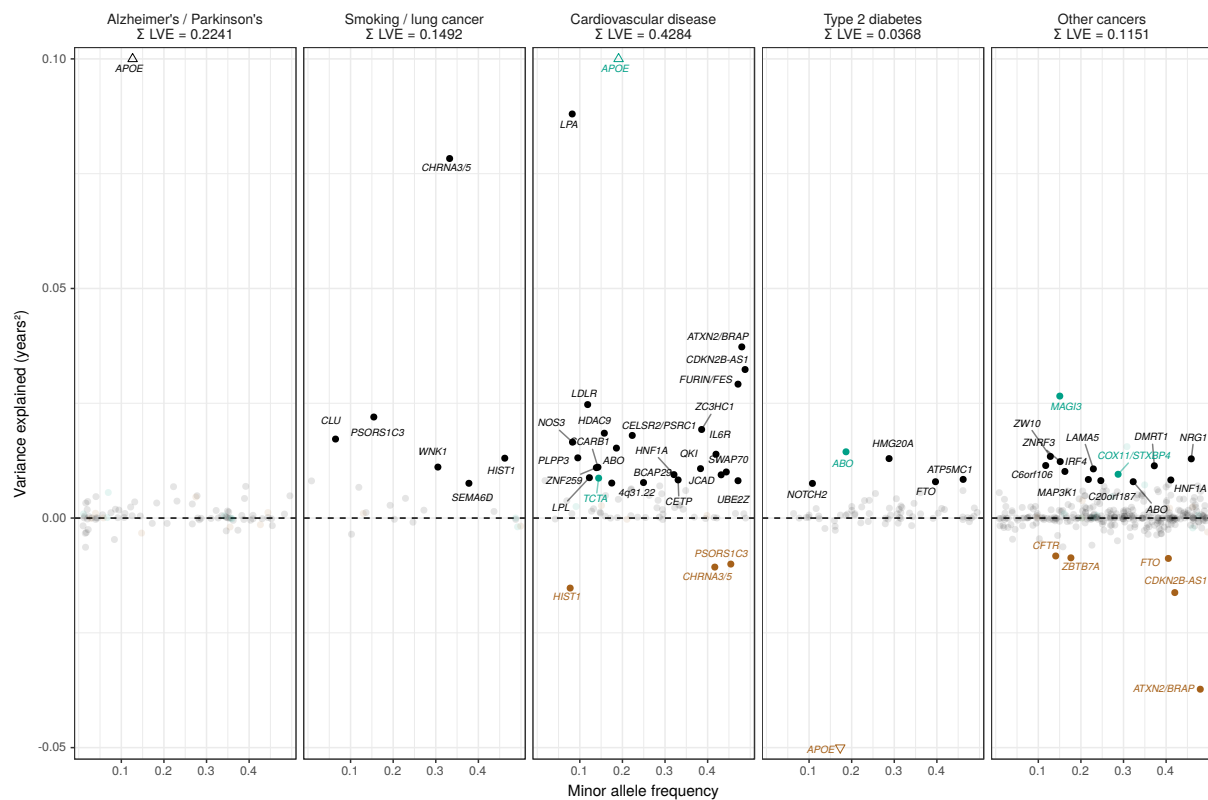

380  
 381  
 382 *Genome-wide significant disease SNPs from the GWAS catalog are plotted against the amount of*  
 383 *lifespan variance explained (LVE), with disease-protective alleles signed positively when increasing*  
 384 *lifespan and signed negatively when decreasing lifespan. SNPs with limited evidence of an effect on*  
 385 *lifespan are greyed out: an FDR cut-off of 1.55% is applied simultaneously across all diseases, allowing*  
 386 *for 1 false positive among all significant SNPs. Secondary pleiotropic SNPs (i.e. those associating more*  
 387 *strongly with another one of the diseases, as assessed by PheWAS in UK Biobank) are coloured to*  
 388 *indicate the main effect on increased lifespan seems to arise elsewhere. Of these, turquoise SNPs show*  
 389 *one or more alternative disease associations in the same direction and at least twice as strong (double*  
 390 *Z statistic – see Detailed Methods) as the principal disease, while brown SNPs show one or more*  
 391 *significant associations with alternative disease in the opposite direction that explains the negative*  
 392 *association of the disease-protective SNP with lifespan. Of specific interest is the SNP near MAGI3,*  
 393 *which is reported as a breast cancer SNP but associates more strongly with CVD in UK Biobank and*  
 394 *shows no evidence of sex-specific effects on lifespan. However, we do not classify it as a CVD SNP as*  
 395 *its main effect on lifespan is likely due to protection from autoimmune disease by a nearby missense*  
 396 *variant (rs6679677\_C,  $r^2 > 0.6$ , 95% CI log OR type 1 diabetes  $-0.74$  to  $-0.46(30)$ ; rheumatoid arthritis*  
 397  *$-0.66$  to  $-0.50(31)$ , and carrying these diseases can reduce life expectancy up to 13 years (32, 33)).*  
 398 *Similarly, the HLA-DQA1 locus also associates most strongly with autoimmune disease and is therefore*  
 399 *absent from the analysis. The variance explained by all SNPs in black is summed ( $\Sigma$ LVE) by disease.*  
 400 *Annotated are the gene, cluster of genes, or cytogenetic band near the lead SNPs. The Y axis has been*  
 401 *capped to aid legibility of SNPs with smaller LVE: SNPs near APOE pass this cap and are represented*  
 402 *by triangles. Alzheimer's / Parkinson's – SNPs associated with Alzheimer's disease or Parkinson's*  
 403 *disease. Smoking / lung cancer – SNPs associated with smoking behaviour, chronic obstructive*  
 404 *pulmonary disease and lung adenocarcinomas. Cardiovascular disease – SNPs associated with*  
 405 *cardiovascular disease or myocardial infarction. Type 2 diabetes – SNPs associated with type 2*  
 406 *diabetes. Other cancers – SNPs associated with cancers other than lung cancer (see Table S19).  $\Sigma$ LVE*  
 407 *– Total Lifespan Variance Explained by non-pleiotropic SNPs passing FDR, in years<sup>2</sup>.*  
 408

409 **Cell type and pathway enrichment**

410

411 At FDR 5%, we find enrichment in SNP heritability in five categories: two histone and two  
412 chromatin marks linked to male and female foetal brain cells, and one histone mark linked to  
413 the dorsolateral prefrontal cortex of the brain. Despite testing other cell types, such as heart,  
414 liver, and immune cells, no other categories were statistically significant after multiple testing  
415 correction (Table S22).

416

417 Next, we determined which biological pathways could explain the associations between our  
418 genetic variants and lifespan, using three different methods. VEGAS highlights 33 gene sets  
419 at FDR 5%, but neither PASCAL nor DEPICT (with SNP thresholds at  $P < 5 \times 10^{-8}$  and  $P < 1$   
420  $\times 10^{-5}$ ) finds any significant gene sets that passed multiple testing correction. The 33 gene  
421 sets highlighted by VEGAS are principally for blood lipid metabolism (21), with the majority  
422 involving lipoproteins (14) or homeostasis (4). Other noteworthy gene sets are neurological  
423 structure and function (5) and vesicle-mediated transport (3). Enrichment was also found for  
424 organic hydroxy compound transport, macromolecular complex remodelling, signalling events  
425 mediated by stem cell factor receptor (c-kit), and regulation of amyloid precursor protein  
426 catabolism (Table S23)

427

428 Finally, we performed an analysis to assess whether genes that have been shown to change  
429 their expression with age(34) are likely to have a causal effect on lifespan itself. Starting with  
430 a set of independent SNPs affecting gene expression (eQTLs), we created categories based  
431 on whether gene expression was age-dependent and whether the SNP was associated with  
432 lifespan in our study (at varying levels of significance).

433 We find eQTLs associated with lifespan are 1.78 to 3.45 times more likely to have age-  
434 dependent gene expression, dependent on the P value threshold used to define the set of  
435 lifespan SNPs (Table S24, Fig. S4).

436 **Out-of-sample lifespan predictions.**

437

438 We calculated polygenic risk scores (PRS) for lifespan for two subsamples of UK Biobank  
439 (Scottish individuals and a random selection of English/Welsh individuals), and one sample  
440 from the Estonian Biobank, using (recalculated) lifespan GWAS summary statistics that  
441 excluded these samples.

442

443 When including all independent markers, we find an increase of one standard deviation in  
444 PRS increases lifespan by 0.8 to 1.1 years, after doubling observed parent effect sizes to  
445 compensate for the imputation of their genotypes (see Table S25 for a comparison of  
446 performance of different PRS thresholds).

447

448 Correspondingly – again after doubling for parental imputation – we find a difference in median  
449 predicted survival for the top and bottom decile of PRS of 5.6/5.6 years for Scottish  
450 fathers/mothers, 6.4/4.8 for English & Welsh fathers/mothers and 3/2.8 for Estonian  
451 fathers/mothers. In the Estonian Biobank, where data is available for a wider range of subject  
452 ages (i.e. beyond median survival age) we find a contrast of 3.5/2.7 years in survival for  
453 male/female subjects, across the PRS tenth to first decile (Table 2, Fig. 8).



454  
455  
456  
457  
458

**Table 2: Polygenic scores for lifespan are predictive of out-of-sample parent and subject lifespans**

| Sample   | Kin      | N      | Deaths | Effect per longevity score SD |       |       |         | Contrast in top vs. bottom decile |       |       |         | Median age at death |       |
|----------|----------|--------|--------|-------------------------------|-------|-------|---------|-----------------------------------|-------|-------|---------|---------------------|-------|
|          |          |        |        | Beta                          | SE    | Years | P       | Beta                              | SE    | Years | P       | Men                 | Women |
| Scotland | Parents  | 46,936 | 33,196 | 0.107                         | 0.011 | 1.1   | 4.2E-22 | 0.483                             | 0.049 | 4.8   | 9.3E-23 | 5.6                 | 5.6   |
| Scotland | Subjects | 24,059 | 941    | 0.085                         | 0.033 | 0.8   | 1.0E-02 | 0.510                             | 0.143 | 5.1   | 3.7E-04 | -                   | -     |
| E&W      | Parents  | 58,070 | 39,347 | 0.133                         | 0.010 | 1.3   | 7.3E-39 | 0.507                             | 0.045 | 5.1   | 1.4E-29 | 6.4                 | 4.8   |
| E&W      | Subjects | 29,815 | 760    | 0.098                         | 0.037 | 1.0   | 7.1E-03 | 0.067                             | 0.161 | 0.7   | 6.8E-01 | -                   | -     |
| Estonia  | Parents  | 61,728 | 29,660 | 0.099                         | 0.012 | 1.0   | 2.5E-17 | 0.296                             | 0.052 | 3.0   | 1.2E-08 | 3                   | 2.8   |
| Estonia  | Subjects | 24,800 | 2,894  | 0.087                         | 0.019 | 0.9   | 2.6E-06 | 0.313                             | 0.082 | 3.1   | 1.3E-04 | 3.5                 | 2.7   |

459  
460  
461  
462  
463  
464  
465  
466  
467  
468  
469  
470  
471  
472  
473

*A polygenic risk score was made for each subject using GWAS results that did not include the subject sets under consideration. Subject or parent survival information (age entry, age exit, age of death, if applicable) was used to test the association between polygenic risk score and survival as (a) a continuous score and (b) by dichotomising the top and bottom decile scores. Sample – Population sample of test dataset, where E&W is England and Wales; Kin – Individuals tested for association with polygenic score; N – Number of lives used for analysis; Deaths – Number of deaths; Beta – Effect size in  $\log_e(\text{protection ratio})$ , doubled in parents to reflect the expected effect in cohort subjects. SE – Standard error, doubled in parents to reflect the expected error in cohort subjects; Years – Estimated effect size in years of life; P – P value of two-sided test of association; Median age at death – difference in years between the median lifespan of individuals in the top decile of the score and the bottom decile (again raw observed parent effects are doubled).*

474 **Fig. 8: Survival curves for highest and lowest deciles of lifespan polygenic risk score.**  
475

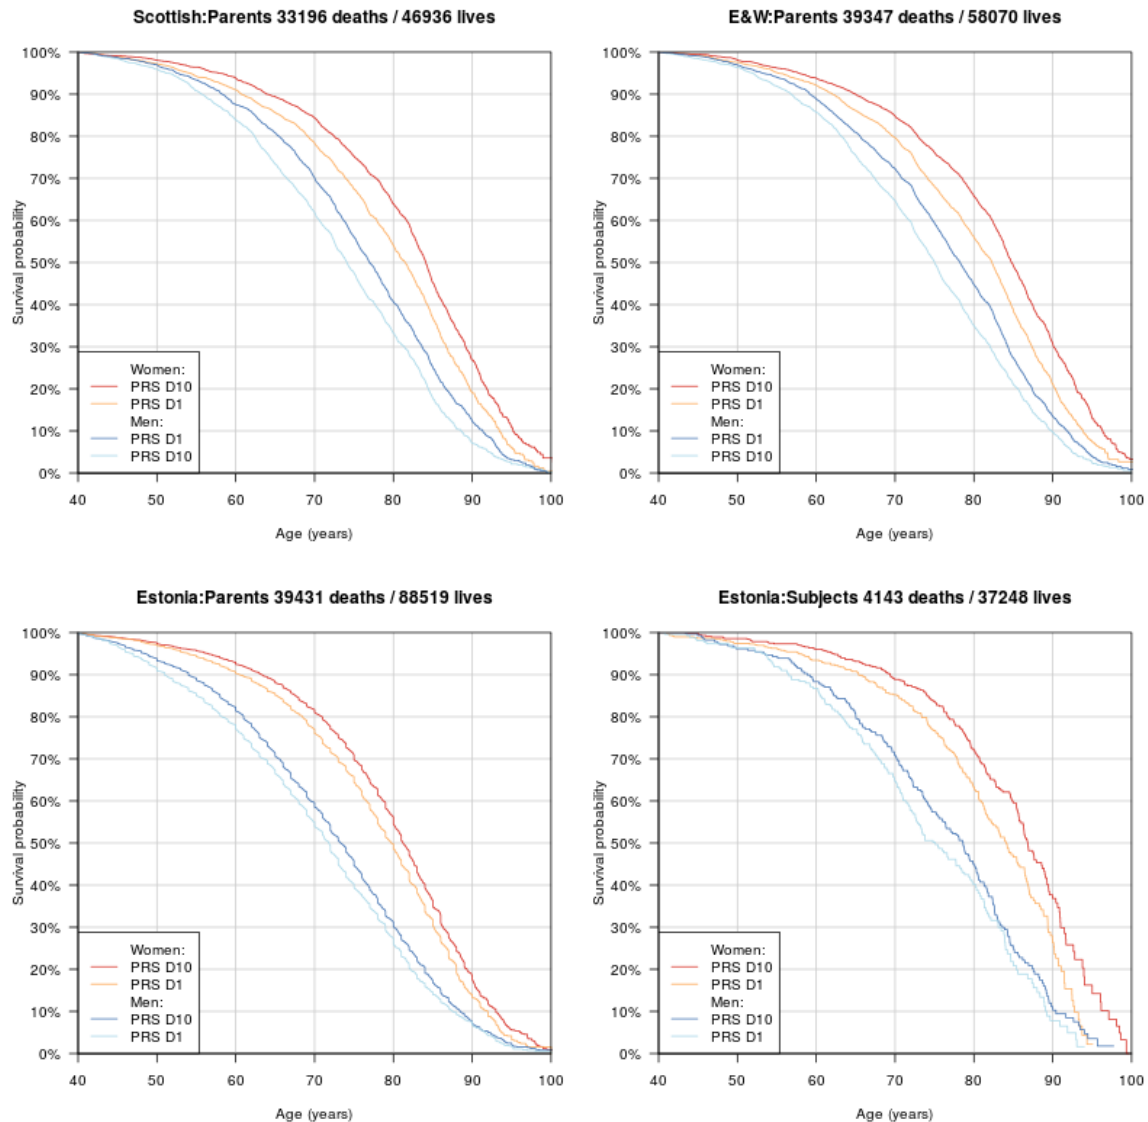

476  
477

478 *A polygenic risk score was made for each subject using GWAS results that did not include the subject*  
479 *sets under consideration. Subject or parent survival information (age entry, age exit, age of death (if*  
480 *applicable) was used to create Kaplan-Meier curves for the top and bottom decile of score. In this*  
481 *figure (only) no adjustment has been made for the dilution of observed effects due to parent imputation*  
482 *from cohort subjects. Effect sizes in parent, if parent genotypes had been used, are expected to be twice*  
483 *that shown. E&W – England and Wales; PRS – polygenic risk score.*

484  
485  
486

487 Finally, as we did for individual variants, we looked at the age- and sex-specific nature of the  
488 PRS on parental lifespan and tested for associations with (self-reported) age-related diseases  
489 in subjects and their kin. We find a high PRS has a larger protective effect on lifespan for  
490 mothers than fathers in UK Biobank subsamples ( $P = 0.0071$ ), and has a larger protective  
491 effect of lifespan in younger age bands ( $P = 0.0001$ ) (Table S26, Fig. 9), although in both  
492 cases, it should be borne in mind that women and younger people have a lower baseline  
493 hazard, so a larger improvement in hazard ratio does not necessarily mean a larger absolute  
494 protection.

495  
496  
497  
498

**Fig. 9 Sex and age specific effects of polygenic survival score (PRS) on parental lifespan in UK Biobank**

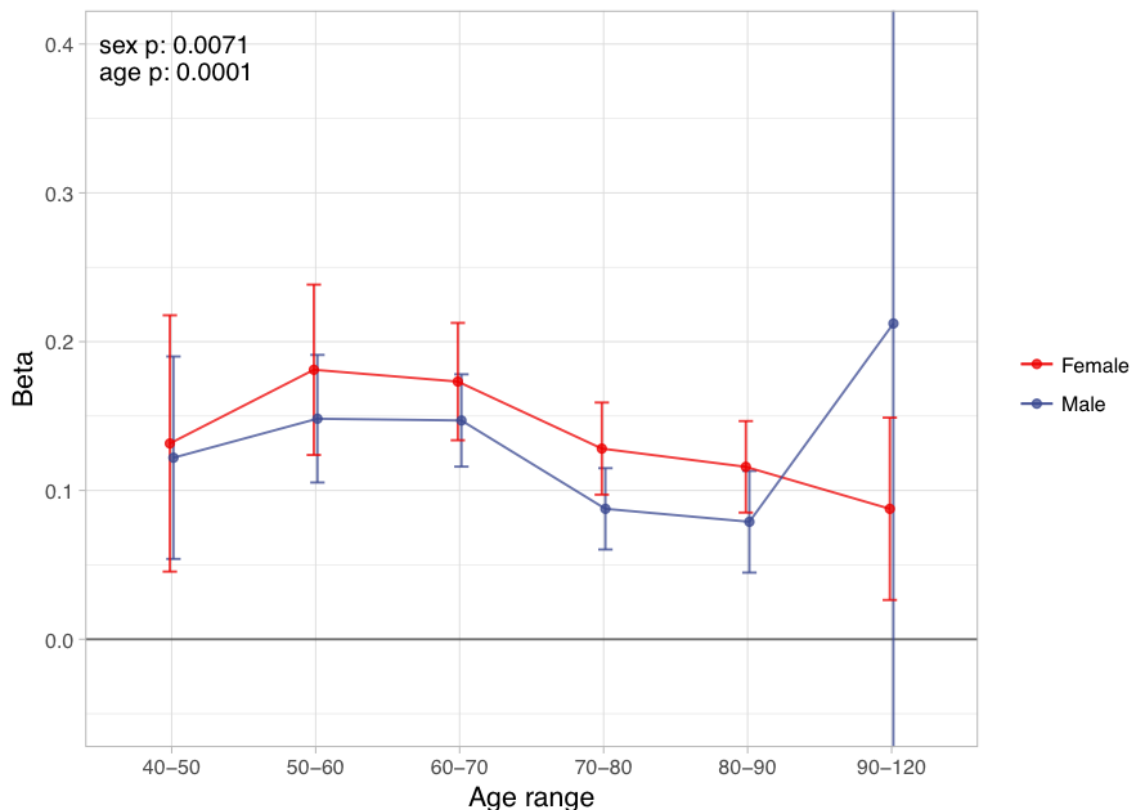

499  
500

501 *The effect of out-of-sample PRS on parental lifespan stratified by sex and age was estimated for Scottish*  
502 *and English/Welsh subsamples individually (see Fig. S5) and subsequently meta-analysed. The estimate*  
503 *for the PRS on father lifespan in the highest age range has very wide confidence intervals (CI) due to*  
504 *the limited number of fathers surviving past 90 years of age. The beta 95% CI for this estimate is -0.15*  
505 *to 0.57. Beta –  $\log_e(\text{protection ratio})$  for 1 standard deviation of PRS for increased lifespan in self in*  
506 *the age band (i.e. 2 x observed due to 50% kinship), bounds shown are 95% CI; Age range – the range*  
507 *of ages over which beta was estimated; sex p – P value for association of effect size with sex; age p –*  
508 *P value for association of effect size with age.*

509

510 We find that overall, higher PRS scores (i.e. genetically longer life) are associated with less  
511 heart disease, diabetes, hypertension, respiratory disease and lung cancer, but increased  
512 prevalence of Alzheimer's disease, Parkinson's disease, prostate cancer and breast cancer,  
513 the last three primarily in parents. We find no association between the score and prevalence  
514 of cancer in subjects. (Table S27, Fig. S6).

515  
516  
517  
518  
519  
520  
521  
522  
523  
524  
525  
526  
527  
528  
529  
530  
531  
532  
533  
534  
535  
536  
537  
538  
539  
540  
541  
542  
543  
544  
545  
546  
547  
548  
549  
550  
551  
552  
553  
554  
555  
556  
557  
558  
559  
560  
561  
562  
563  
564  
565  
566  
567  
568  
569

## Discussion

Applying the kin-cohort method in a GWAS across UK Biobank and the LifeGen consortium, we replicated associations with lifespan for 6 loci discovered previously and 6 discovered here. We identified a further 12 novel lifespan variants at genome-wide significance, without replication. Further discussion of the loci, their mechanism, diseases and power are contained in SI Appendix - section 3.

Genetic variants affecting lifespan were enriched for pathways involving the transport, homeostasis and metabolism of lipoprotein particles, validating previous reports(35). We also identified new pathways including vesicle transport, metabolism of acylglycerol and sterols, and synaptic and dendritic function. We discover histone marks associated with foetal brain cells and the adult dorsolateral prefrontal cortex are enriched for human lifespan heritability.

We described multiple disease associations of life-lengthening variants and whole-genome polygenic risk scores with protection from cardiovascular disease, diabetes, COPD, and lung cancer, but found very few associations with other forms of cancer, suggesting cancer causes death more through (perhaps many) rarer variants or the environment. Finally, we showed that, using our GWAS results, we can construct a polygenic risk score making 3 to 5 year distinctions in life expectancy at birth between individuals from the score's top and bottom decile.

Despite replicating long-standing longevity SNPs near *APOE*, *FOXO3*, and 5q33.3/*EBF1* – albeit with smaller effect sizes in the latter two cases – we do not find evidence of association with lifespan for more recently published longevity SNPs near *IL6*, *ANKRD20A9P*, *USP42*, and *TMTC2*. Although this could be due to the original findings arising from chance, differences in ancestry and sample structure might also be the cause, but more intriguingly there remains the possibility that we were unable to replicate the effects because they uniquely act through mechanisms slowing the ageing process which only become apparent in the extremely long-lived.

At the same time, our analysis comparing lifespan and longevity effect sizes suggests that lifespan SNPs often associate with extreme long-livedness, consistent with the genetic correlation between the two traits ( $r_g = 0.73$ ;  $SE = 0.11(35)$ ). Again, the remaining 27% clearly leaves room for SNPs affecting lifespan and longevity in distinct ways.

Much work has been done implicating *FOXO3* as an aging gene in model organisms(36, 37), however we found the association in humans at that locus may be driven by expression of *SESN1* (admittedly a finding restricted to peripheral blood tissue). *SESN1* is a gene connected to the *FOXO3* promoter via chromatin interactions and involved in the response to reactive oxygen species and mTORC1 inhibition(38). This contrasts with fine-mapping studies which found common genetic variation within the locus increases expression of *FOXO3* itself (39, 40)

The magnitude of the distinctions our genetic lifespan score is able to make (5 years of life between top and bottom decile) is meaningful socially and actuarially: the implied distinction in price (14%; Methods) being greater than some recently reported annuity profit margins (8.9%)(41). However, the legal and ethical frameworks (at least in the UK(42)) surrounding genomic testing and commercial applications, such as life insurance, have yet to regulate the use of genome-wide measures (rather than single markers), especially for annuities. This needs to be urgently addressed.

Although clearly meaningful in isolation, our lifespan predictions may only have practical clinical or actuarial meaning if, rather than at birth, distinctions in lifespan can be drawn in

570 middle age, and include independent information beyond that readily available using existing  
571 risk measures (e.g. occupation, smoking and blood pressure) in middle age. Such an  
572 assessment has been beyond the scope of this work; in part as such risk measures are not  
573 readily available for the parents (rather than offspring) studied.

574

575 The analysis of parent lifespans has enabled us to probe mortality for a generation whose  
576 lives have often been complete and attain unprecedented power in a survival GWAS, but  
577 changes in the environment (and thus the relative importance of each genetic susceptibility,  
578 for example following the smoking ban) inevitably mean we have less certainty about  
579 associations with prospective lifespans for the present generation of middle aged people, or  
580 the next.

581

582 The diseases which we found were associated with lifespan SNPs mirror the causal effect  
583 estimates from mortality risk factors(35) and are some of the leading causes of death across  
584 the world(43). However, importantly, the identified effects of lifespan-associated SNPs are not  
585 simply those of the risk factors. Surprisingly, although cancer is a major source of mortality,  
586 common genetic variation associated with increased lifespan does not appear to arise from a  
587 protection from cancers (other than lung cancer mediated through smoking), despite reported  
588 heritabilities for myocardial infarction and cancers being similar: around 30%(44, 45) All this  
589 suggests genetic variation for non-lung cancer alleles affecting lifespan is either rarer (e.g.  
590 *BRCA1*(46)), has smaller effects, or exhibits antagonistic pleiotropic effects, either due to  
591 linkage or biological compromise. Curiously, we find little evidence of SNPs of large  
592 deleterious effect on lifespan acting with antagonistic pleiotropy on other fitness and  
593 developmental component traits, despite long-standing theoretical suggestions to the contrary  
594 (47). However, we did not examine mortality before the age of 40, or mortality of individuals  
595 without offspring (by definition as we were examining parental lifespans), which may well have  
596 exhibited this feature.

597

598 In conclusion, recent genomic susceptibility to death in the normal age range seems rooted in  
599 modern diseases: Alzheimer's, lung cancer and CVD; in turn arising from our modern – long-  
600 lived, obesogenic and tobacco-laden – environment, however the keys to the distinct traits of  
601 aging and extreme longevity remain elusive. At the same time, genomic information alone  
602 can now make material predictions of variations in expected length of life, although the  
603 accuracy of the predictions is far from supporting genetic determinism of that most (self-)  
604 interesting of traits - your lifespan.

605 *Methods - Summary*

606  
607

608 **GWAS**

609 For each European ethnicity in UK Biobank, association analysis was performed between  
610 unrelated subjects' genotypes (MAF > 0.005; HRC imputed SNPs only; ~9 million markers)  
611 and parent survival using age and alive/dead status in residualised Cox models, as described  
612 in (5) (5). To account for parental genotype imputation, effect sizes were doubled, yielding log  
613 hazard ratios for the allele in carriers themselves. These values were inverted to obtain a  
614 measure of log protection ratio, where higher values indicate longer life.

615

616 Mother and father survival information was combined in two separate ways, essentially  
617 assuming the effects were the same in men and women (common effects between sexes;  
618 CES), or allowing for sex-specific effect sizes (potentially different effects between sexes;  
619 PDES), with appropriate allowance for the covariance amongst the traits. For the second  
620 analysis we used MANOVA, implemented in MultiABEL (48). (48)

621

622 For LifeGen, where individual-level data was not available, parent survival summary statistics  
623 were combined for CES using conventional fixed-effects meta-analysis, adjusted to account  
624 for the correlation between survival traits (estimated from summary-level data). For PDES, the  
625 same procedure was followed as for the UK Biobank samples, with correlation between traits  
626 again estimated from summary-level data.

627

628 CES discovery and replication statistics were combined with inverse-variance meta-analysis.  
629 Both the discovery GWAS and combined cohort GWAS showed acceptable inflation, as  
630 measured by their LD-score regression intercept (<1.06, Table S4).

631

632

633 **Candidate SNP replication**

634 Effect sizes from longevity studies were converted to our scale using an empirical conversion  
635 factor, based on the observed relationships between longevity and hazard ratio at the most  
636 significant variant at or near APOE, observed in the candidate SNPs study and our data (5).

637

638 Estimates reported in Pilling et al. (6) were based on rank-normalized Martingale residuals,  
639 unadjusted for the proportion dead, which – for individual parents – could be converted to our  
640 scale by multiplying by  $\sqrt{c}/c$ , where  $c$  is the proportion dead in the original study (see  
641 Detailed Methods for derivation). Combined parent estimates were converted using the same  
642 method as the one used for longevity studies.

643

644 The deletion reported by Ben-Avraham et al. (26) is perfectly tagged by a SNP that we used to  
645 assess replication. Assuming a recessive effect and parental imputation, we derived the  
646 expected additive effect to be  $\hat{\beta}_C = \hat{\beta}_{CC} \frac{q^2}{q^2 + 2pq}$ , where  $\hat{\beta}_C$  is the additive effect we expect to  
647 observe,  $\hat{\beta}_{CC}$  is the homozygous effect reported in the original study,  $q$  is the C allele  
648 frequency, and  $p$  is  $1 - q$ . (see Detailed Methods for derivation)

649

650

651 **iGWAS**

652 58 GWAS on mortality risk factors were used to create Bayesian priors for the SNP effects  
653 observed in the combined cohort CES study, as described in (35). In short, Mendelian  
654 randomisation was used to estimate causal effects of independent risk factors on lifespan,  
655 and these estimates were combined with the risk factor GWAS to calculate priors for each  
656 SNP. Priors were multiplied with observed Z statistics and used to generate Bayes factors.  
657 Observed Z statistics were then permuted, leading to 7.2 billion null Bayes factors (using the  
658 same priors), which were used to assess significance.

659  
660  
661  
662  
663  
664  
665  
666  
667  
668  
669

### **Sex and age stratified analysis**

Cox survival models, adjusting for the same covariates as the standard GWAS, were used to test SNP dosage against father and mother survival separately. The analysis was split into age bands, where any parent who died at an age younger than the age band was excluded and any parent who died beyond the age band was treated as alive. Using the R package “metafor”, moderator effects of sex and age on hazard ratio could be estimated while taking into account the estimate uncertainty (see Detailed Methods for formula).

### **Causal genes and methylation sites**

SMR-HEIDI (49) tests were performed on our combined cohort CES statistics to implicate causal genes and methylation sites. Summary-level data from two studies on gene expression in blood (50, 51) and data on gene expression in 48 tissues from the GTEx consortium (52) were tested to find causal links between gene expression and lifespan. Similarly, data from a genome-wide methylation study (53) was used to find causal links between CpG sites and lifespan. All results from the SMR test passing a 5% FDR threshold where the HEIDI test  $P > 0.05$  were reported.

678  
679

### **Conditional analysis**

SOJO (54) was used to fine-map the genetic signals in 1 Mb regions around each top SNP identified in the discovery GWAS, combined cohort GWAS, and iGWAS. The analysis was based on UK Biobank CES discovery statistics, using the CES replication cohort to optimise the LASSO regression tuning parameters. For each parameter, a polygenic score was built and the proportion of predictable variance from the regional polygenic score in the validation sample was calculated.

687  
688

### **Disease-wide association analysis**

Logistic regression, adjusted for subject sex; subject age; genotyping batch and array; and 40 principal components, was used to test diseases against SNP dosages from lead SNPs from our discovery and combined cohort GWASs, and external survival GWAS. Diseases were self-reported by 325,292 unrelated, genomically British subjects from UK Biobank about themselves, their siblings, and each parent. Before analysis, subject diseases were grouped to match pre-existing disease categories for family members (see Table S16 for grouping). Results were corrected for multiple testing using Benjamini-Hochberg with an FDR threshold of 5% and then further grouped into broad disease categories.

PhenoScanner was used to look up known associations with the same SNPs and close proxies ( $r^2 > 0.8$ ) (25). All associations passing a 5% FDR threshold were divided using keywords into broad disease categories, which were then further curated (see Table S18 and Detailed Methods for grouping criteria).

702  
703

### **Lifespan variance explained by disease SNPs**

The GWAS catalog was checked for disease associations discovered in European ancestry studies, which were grouped into broad disease categories based on keywords and manual curation (see Table S19 and Detailed Methods). Associations were pruned by distance (500kb) and LD ( $r^2 < 0.1$ ), keeping the SNP most strongly associated with lifespan in the combined cohort CES GWAS. Where possible this SNP was tested against diseases in UK Biobank subjects and their family, as described above, to test for pleiotropy. Significance of associations with lifespan was determined by setting an FDR threshold that allowed for 1 false positive among all independent SNPs tested ( $q \leq 0.022$ ). Lifespan variance explained (LVE)

711  
712

713 was calculated as  $2pqa^2$ , where p and q are the frequencies of the effect and reference alleles  
714 in our lifespan GWAS, and a is the SNP effect size in years of life (55).

715

### 716 **Cell type enrichment**

717 Stratified LD-score regression (56) was used to test for cell type-specific enrichment in lifespan  
718 heritability in the CES discovery cohort GWAS statistics, which had the highest SNP  
719 heritability as measured by LD-score regression (57). The statistics were analysed using the  
720 procedure described in (56), and P values were adjusted for multiple testing using the  
721 Benjamin-Hochberg procedure.

722

### 723 **Pathway enrichment**

724 VEGAS2 v2.01.17 (58) was used to calculate gene scores using SNPs genotyped in UK  
725 Biobank, based on summary statistics of the combined cohort CES GWAS and the default  
726 software settings. VEGAS2Pathway was then used to check for pathway enrichment using  
727 those gene scores and the default list of gene sets (59).

728 DEPICT (60) was also used to map genes to lifespan loci and check for pathway enrichment  
729 in the combined cohort CES GWAS. Default analysis was run for regions with genome-wide  
730 significant ( $P < 5e-8$ ) variants in the first analysis, and genome-wide suggestive ( $P < 1e-5$ )  
731 variants in the second analysis, excluding the MHC in both cases.

732 PASCAL (61) was used with the same summary statistics and gene sets as DEPICT, except  
733 the gene probabilities within the sets were dichotomized ( $Z > 3$ ) as described in (62).

734 For each software independently, pathway enrichment was adjusted for multiple testing using  
735 the Benjamin-Hochberg procedure.

736

### 737 **Age-related eQTL enrichment**

738 Combined cohort CES lifespan statistics were matched to eQTLs associated with the  
739 expression of at least one gene ( $P < 1e-4$ ) in a dataset provided to us by the eQTLGen  
740 Consortium (14,155 individuals). Data on age-related expression (34) allowed eQTLs to be  
741 divided into 4 categories based on association with age and/or lifespan. Fisher's exact test  
742 was used check if age-related eQTLs were enriched for associations with lifespan.

743

### 744 **Polygenic score analysis**

745 Polygenic risk scores (PRS) for lifespan were calculated for two subsamples of UK Biobank  
746 (24,059 Scottish individuals and a random 29,815 English/Welsh individuals), and 36,499  
747 individuals from the Estonian Biobank, using combined cohort CES lifespan summary  
748 statistics that excluded these samples. PRSice 2.0.14.beta (63) was used to construct the  
749 scores from genotyped SNPs in UK Biobank and imputed data from the Estonian Biobank,  
750 pruned by LD ( $r^2 = 0.1$ ) and distance (250kb). Polygenic scores were Z standardised.

751 Cox proportional hazard models were used to fit parental survival against polygenic score,  
752 adjusted for subject sex; assessment centre; genotyping batch and array; and 10 principal  
753 components. Parental hazard ratios were converted into subject years of life as described in  
754 the GWAS method section.

755 Logistic regression models were used to fit polygenic score against the same self-reported UK  
756 Biobank disease categories used for individual SNPs. Effect estimates of first degree relatives  
757 were doubled to account for imputation of genotypes and then meta-analysed using inverse  
758 variance weighting, adjusting for trait correlations between family members.



759 *Data availability*

760

761 The results that support our findings, in particular, the GWAS summary statistics for >1 million  
762 parental lifespans in this study are available to bona-fide researchers from the corresponding  
763 author upon request or from UK Biobank(5, 34, 64, 65) eQTLGen Consortium results will be  
764 made available after that manuscript is published.

765

766 *Methods - Details*

767

768

769 **Data sources**

770 Our discovery cohort consisted of 409,700 genomically British individuals from UK Biobank.  
771 Details on genotyping marker and sample QC are described in (23). Subjects completed a  
772 questionnaire which included questions on adoption status, parental age, and parental deaths.  
773 For our analysis, we excluded individuals who were adopted or otherwise unclear about their  
774 adoption status (N = 5,829), individuals who did not report their parental ages (N = 2,650),  
775 and individuals both of whose parents died before the age of 40 and which were therefore  
776 more likely due to accident or injury (N = 3,927). We further excluded one of each pair from  
777 related individuals (N = 71,288) from every relative pair reported by UK Biobank, leaving  
778 326,006 individuals for the final analysis. Although exclusion of relatives reduces sample size,  
779 we were concerned that linear mixed modelling to account for relatedness might not be fully  
780 appropriate under the kin-cohort model. Consider the parental phenotypic correlation for two  
781 full sibling subjects ( $r^2 = 1$ ) or the maternal genetic covariance amongst two subjects who are  
782 the offspring of two brothers ( $r^2 = 0$ ): the heritability/GRM implied covariance is incorrect for  
783 both cases (although in the sibling case, it may be correct on average). Individuals passing  
784 QC reported a total of 312,260 paternal and 322,945 maternal lifespans, ranging from 40 to  
785 107 years of life, i.e. 635,205 lives in total (Table S1).

786

787 Our replication dataset was LifeGen, a consortium of 26 population cohorts investigating  
788 genomic effects on parental lifespans(5). LifeGen had included results from UK Biobank, but  
789 the UK Biobank GWAS data were removed here, giving GWAS summary statistics for 160,461  
790 father and 160,158 mother lifespans in the form of log hazard ratios. This dataset was then  
791 supplemented by 56,416 parental lifespans of UK Biobank individuals of self-reported British  
792 (but not identified as genomically British), Irish, and other white European descent, not  
793 included in the discovery. Cohorts were combined using inverse-variance meta-analysis,  
794 giving a total replication set of 377,035 lifespans, and over 1 million lives across discovery and  
795 replication combined.

796

797 **UK Biobank Genome-Wide Association Study**

798 In the discovery and UK Biobank portions of the replication cohorts separately for each self-  
799 declared ethnicity, we carried out association analysis between genotype (MAF > 0.005; HRC  
800 imputed SNPs only; ~9 million markers) and parent age and alive/dead status, effectively  
801 analysing the effect of genotype in offspring on parent survival, given survival to at least age  
802 40, using Cox Proportional Hazards models. The following model was assumed to hold:

803

804 Equation1

805

$$806 \quad h(x) = h_0(x)e^{\beta X + \gamma_1 Z_1 + \dots + \gamma_k Z_k}$$

807

808 Where  $x$  is (parent) age,  $h_0$  the baseline hazard and  $X$  the offspring genotype(coded 0,1,2),  
809  $\beta$  the  $\log_e$ (hazard ratio) associated with  $X$  and  $Z_1$ - $Z_k$  the covariates, with corresponding  
810 effect sizes  $\gamma_1$ - $\gamma_k$ . The covariates were genotyping batch and array, the first forty principal  
811 components of relatedness, as provided by UK Biobank, and subject sex (but not age, as we  
812 were analysing parent age).

813

814 To facilitate practical runtimes, the Martingale residuals of the Cox model were calculated for  
815 father and mothers separately and multiplied by 1/proportion dead to give estimates of the  
816 hazard ratio(66) giving a residual trait suitable for GWAS (for more details of the residual  
817 method see Joshi et al.(5)). Effect sizes observed under this model, for a SNP in offspring,  
818 are half that of the actual effect size in the parent carrying the variant(3). Reported effect sizes  
819 (and their SE) have therefore been doubled to give the effect sizes in carriers themselves,  
820 giving an estimate of the log hazard ratios (or often, with sign reversed, log protective ratios).  
821 These estimates are suitable for meta-analysis and allow direct comparison with the log  
822 hazard ratios from LifeGen.

823  
824 Analysis of association between genotype and survival across both parents was made under  
825 two contrasting assumptions and associated models, which had to adjust for the covariance  
826 amongst parent traits, preventing conventional unadjusted inverse-variance meta-analysis.  
827 Firstly, we assumed that the hazard ratio was the same for both sexes, i.e. a common effect  
828 size across sexes (CES). If there were no correlation amongst parents' traits, this could have  
829 been done by straightforward inverse variance meta-analysis of the single parent results.  
830 However, to account for the covariance amongst father and mother lifespans, we calculated  
831 a total parent residual, the sum of individual parent residuals, for each subject (i.e. offspring).  
832 Under the common effect assumption, the combined trait's effect size is twice that in the single  
833 parent, and the variance of the combined trait, automatically and appropriately reflects the  
834 parents' covariance, amongst the two parents, giving a residual trait suitable for GWAS, with  
835 an effect size **equal** to that in a carrier of the variant, and correct standard error. Secondly, we  
836 assumed that, there might be potentially different effect sizes across sexes (PDES) in fathers  
837 and mothers. Under the PDES assumption, individual parental GWAS were carried out, and  
838 the summary statistics results were meta-analysed using MANOVA, accounting for the  
839 correlation amongst the parent traits and the sample overlap (broadly complete), but agnostic  
840 as to whether the effect size was similar or different in each parent, giving a P value against  
841 the null hypothesis that both effect sizes are zero, but, naturally, no estimate of a single  
842 common beta. This procedure was carried out using the R package MultiABEL(48) and used  
843 summary-level data for the analysis(67). The procedure requires an estimate of the correlation  
844 amongst the traits (in this case parent residuals), which was measured directly ( $r = 0.1$ ). The  
845 procedure automatically estimates the variance of the traits from summary level data (Mother  
846 residuals  $\sigma^2 = 6.74$ ; Father residuals  $\sigma^2 = 5.25$ )

847  
848 For the replication cohort, the PDES procedure to combine results was identical to discovery  
849 (Mother residuals  $\sigma^2 = 14.12$ ; Father residuals  $\sigma^2 = 18.75$ ), except the trait correlation was  
850 derived from summary level data instead of measured directly ( $r = 0.1$ ). This was done by  
851 taking the correlations in effect estimates from independent SNPs from the summary statistics  
852 of the individual parents, which equals the trait correlation, assuming full sample overlap  
853 (which is slightly conservative). Similarly, since we did not have access to individual level  
854 (residual) data, it was not possible to carry out a single total parent residual GWAS under the  
855 CES assumption. Instead we meta-analysed the single parent effect sizes using inverse  
856 variance meta-analysis, but adjusted the standard errors to reflect the correlation amongst the  
857 traits ( $r$ ) as follows:

858  
859 
$$SE(\hat{\beta}) = SE_0(\hat{\beta}) * \sqrt{1+r}$$

860  
861 Where  $SE_0(\hat{\beta})$  is the usual (uncorrected) inverse-variance weighted meta-analysis standard  
862 error, ignoring the correlation amongst the estimates and  $SE(\hat{\beta})$  is the corrected estimate  
863 used.

864  
865 This is slightly conservative as

866 
$$Variance(\hat{\beta}) = Variance_0(\hat{\beta}) \left(1 + \frac{2rs_1s_2}{s_1^2+s_2^2}\right) \leq (1+r) * Variance_0(\hat{\beta}) \text{ (Equation 2)}$$

867 which follows straightforwardly from  $\hat{\beta} = \frac{P_1\hat{\beta}_1 + P_2\hat{\beta}_2}{P_1 + P_2}$ .

868 Where  $s_1$  and  $s_2$  are the standard error of the individual estimates and  $P_1, P_2$  their associated  
869 precisions (i.e. reciprocal of the variance). Equation (2) is always conservative, but exact if  
870  $s_1 = s_2$ . In practice  $s_1$  and  $s_2$  were similar, as the sample sizes, allele frequencies and variance  
871 in the traits for the two parents were very similar.

872

873 As we were using unrelated populations and fitting forty principal components to control for  
874 population structure, material inflation of test statistics due to structure or relatedness was not  
875 to be expected. This was confirmed using the intercept of LD-score regression(57) for the  
876 summary statistics as shown in Table S4. We have tried to use a consistent approach to the  
877 direction of lifespan altering effects: positive implies longer life, consistent with previous  
878 studies of long-livedness(15). Our base measure was thus a protection ratio, directly mirroring  
879 the cox hazard ratio. Effect sizes (betas) are typically  $-\log_e(\text{cox hazard ratio})$ , which we denote  
880 the  $\log_e(\text{protection ratio})$ . Years of life gained were estimated as  $10 * \log$  protection ratio, in  
881 accordance with a long-standing actuarial rule of thumb and recently verified(5).

882

### 883 **Candidate SNP replication**

884 We sought to reproduce and replicate genome-wide significant associations reported by Pilling  
885 et al.(6), who recently published a GWAS on the same UK Biobank data, but using a slightly  
886 different method. Rather than excluding relatives, Pilling et al. used BOLT-LMM and the  
887 genomic relationship matrix in subjects, to approximately account for covariance amongst  
888 parental phenotype. Pilling et al. also analysed parents separately as well as jointly, using a  
889 last survivor phenotype. Despite these factors, reproduction (obtaining the same result from  
890 almost the same data) was straightforward and consistent, once effect sizes were placed on  
891 the same scale (see below and **Fig. S1**), confirming our re-scaling was correct. To try to  
892 independently replicate their results, we used the consortium, LifeGen, excluding individuals  
893 from UK Biobank.

894

895 Pilling et al.(6) performed multiple parental survival GWAS in UK Biobank, identifying 14 loci  
896 using combined parent lifespan and 11 loci using individual parent lifespan. Their study design  
897 involved rank-normalising Martingale residuals before regressing against genotype, which  
898 does not give an estimate of the  $\log_e(\text{hazard ratio})$ , nor, we believe, another naturally  
899 interpretable scale of effects, as the scale is now dependent on the proportion dead.  
900 Simulations (not shown) suggested  $sd \approx \sqrt{c}$  for some Martingale residual distributions, where  
901  $sd$  is the standard deviation of the distribution and  $c$  is the proportion dead. As multiplying the  
902 untransformed Martingale residual distribution by  $1/c$  gives an estimate of the hazard ratio (5,  
903 66)), for individual parents, we could convert Pilling et al's effect sizes by multiplying them by  
904  $\sqrt{c}$  to return them to the Martingale residual scale (which still depends on the study  
905 structure) and then by  $1/c$  to place them on the log HR scale, using the proportion dead from  
906 Pilling et al.'s study descriptives. Further multiplication by 2 allows conversion from a subject-  
907 parent effect to an effect in self. The cumulative scale conversion allowing for all three of these  
908 effects was to multiply Pilling et al's effect sizes by 2.5863/2.2869 in mothers/fathers,  
909 respectively, placing them on a  $\log_e$  HR scale for effects in male/female subjects. The joint life  
910 parent phenotype does not appear to have a straightforward conversion to  $\log_e$  HR in self.  
911 Instead, we used an empirical estimate derived from effect sizes comparison of the APOE  
912 allele between Pilling's discovery sample and our own UK Biobank Gen. British discovery  
913 sample (both parents combined), which were largely overlapping: to get from Pilling et al.'s  
914 effect size to  $\log_e$  HR, we had to multiply their effect sizes by 1.9699 for APOE and used this  
915 ratio for other alleles, which should be completely valid under the proportional hazard  
916 assumption. Whilst this scheme may appear a little *ad hoc* (the use of simulation and APOE),  
917 it was confirmed empirically: visual inspection indeed showed hazard ratios from our own UK  
918 Biobank discovery sample calculations and inferred hazard ratios from Pilling were highly  
919 concordant (**Fig. S1**, noting one concordance – for joint life at APOE, which was pre-defined  
920 to be perfectly concordant by our procedure, is not, of itself, evidence).

921  
922 Flachsbart et al.(13) and Deelen et al.(15) tested extreme longevity cases (95–110 years, ≥85  
923 years, respectively) against controls (60–75 years, 65 years, respectively), identifying SNPs  
924 at or near *FOXO3* and 5q33.3/*EBF1*. As done previously(5), we estimated the relationship  
925 between longevity log odds ratio and log hazard ratio empirically using APOE variant  
926 rs4420638\_G (reported log OR –0.33 (15), our log HR –0.086), assuming increased odds of  
927 surviving to extreme age is due to a reduction in lifetime mortality risk. Inverting the sign to  
928 give  $\log_e(\text{protection ratio})$  estimates, the conversion estimate used was -3.82.

929 Ben-Avraham et al.(26) reported a deletion in Growth Hormone Receptor exon 3 (*d3-GHR*)  
930 associated with an increase of 10 years in male lifespan when homozygous. This deletion is  
931 tagged by rs6873545\_C(68), which is present in our combined discovery and replication  
932 sample at a frequency of 26.9% ( $q$ ). Considering the association is recessive and we are  
933 imputing father genotypes, we converted the reported effect size into expected years of life  
934 per allele as follows:

935  
936 If the subject genotype is CT, the parent contributing the C allele has 50% chance of being  
937 the father and  $\frac{q^2}{q^2+2pq}$  chance of being homozygous. If the subject genotype is CC, the father

938 has 100% chance of contributing the C allele and again has  $\frac{q^2}{q^2+2pq}$  chance of being  
939 homozygous. We therefore expect the relationship to be  $\hat{\beta}_C = \frac{1}{2}\hat{\beta}_{CC}\frac{q^2}{q^2+2pq}$ , where  $\hat{\beta}_C$  is the  
940 observed effect per subject allele on father lifespan and  $\hat{\beta}_{CC}$  is the reported effect of the  
941 homozygous deletion in the father. As before, doubling the allele effect gives an estimate of  
942 the effect of the allele on subject lifespan, which finally yielded a converted estimate of 0.155:  
943 i.e. under Ben-Avraham et al.'s assumptions on inheritance patterns, if their estimate of effect  
944 size in minor homozygotes is correct, we should see under the additive model an effect size  
945 of 0.155 years, or a  $\log_e(\text{hazard ratio})$  of –0.015, and correspondingly scaled standard errors  
946 (note we are assuming that the effect is actually recessive, and estimating how that effect  
947 should appear if an additive model is fitted).

948  
949 Standard errors were calculated from inferred betas and reported P values, assuming a two-  
950 sided test with a normally distributed estimator. Confidence interval overlap was then  
951 assessed using a two-sided test on the estimate difference ( $P_{\text{diff}}$ ), using a Z statistic from the  
952 difference divided by the standard error of the difference.

## 953 954 **iGWAS**

955 We performed a Bayesian Genome-Wide Association Study using the CES discovery-  
956 replication meta-analysis results and summary statistics on 58 risk factor GWASs (imputed,  
957 leading to 7.2 million SNPs in common between all the studies), as described by McDaid et  
958 al. (35). To calculate our prior for SNPs on a given chromosome, first we used a multivariate  
959 Mendelian Randomization (masking the focal chromosome) to identify the risk factors  
960 significantly influencing lifespan and estimate their causal effect. This identified 16 risk factors  
961 independently causally contributing to lifespan (see Table S9 for the causal effect estimates).  
962 Next, assuming that a SNP affects lifespan through its effects on the 16 risk factors, prior  
963 effects estimates were estimated as the sum of the products of the causal effect estimates of  
964 the 16 significant risk factors on lifespan and the effect of the SNP on each risk factor. We  
965 added 1 to the prior effect variance formula described in McDaid et al. (35) to account for the  
966 fact that prior effects are estimated using observed Z-scores, and not true Z-scores, with  
967  $Z_{\text{obs}} \sim \mathcal{N}(Z_{\text{true}}, 1)$ .

968  
969 We computed Bayes factors by combining the prior effects and the observed association Z  
970 statistics. The significance of the Bayes factors was assessed using a permutation approach  
971 to calculate P values, by comparing observed Bayes factors to 7.2 billion null Bayes factors.  
972 These null Bayes factors were estimated using 1000 null sets of Z statistics combined with the

973 same priors. These empirical P values were then adjusted for multiple testing using the  
974 Benjamini-Hochberg procedure.

975

### 976 **Replication in extreme long-livedness**

977 Published summary statistics for 3 GWAMAs of extreme long-livedness were used from  
978 Deelen *et al.* (age > 90)(15), Broer *et al.* (10), Walker *et al.* (28). Effect sizes were given (or  
979 could be estimated from P value, effect direction and N, as well as the SNPs MAF). These  
980 effect sizes were rescaled to hazard ratios, using the effect size in the GWAMA concerned at  
981 the reference SNP (rs2075650 near APOE), compared to the hazard ratio in our own GWAS,  
982 giving an assumed hazard ratio of 0.0822 in all GWAMA at rs2075650 and proportionate effect  
983 sizes at all other SNPs. This method assumes a stable relationship between the lifespan  
984 hazard ratio and effect on longevity, as is true under the proportionate hazards assumption  
985 (5) Having recalibrated the 3 published GWAMAs to a common scale, effect sizes were meta-  
986 analysed using fixed-effect inverse variance meta-analysis. Test of the hypothesis that the  
987 effect was zero, was one sided, with alternate hypothesis that the effect had the same sign as  
988 in discovery. Effect sizes in discovery and replication were then compared by calculating the  
989 ratio (alpha) of replication effect sizes to discovery effect sizes:

990

$$991 \alpha = \frac{\beta_{rep}}{\beta_{disc}}$$

992

993 and its standard error using the following formula, reflecting the Taylor series expansion of the  
994 denominator for SE:

995

$$996 SE_{\alpha} = \sqrt{\frac{SE_{rep}^2}{\beta_{disc}^2} + \frac{\beta_{rep}^2 SE_{disc}^2}{(\beta_{disc}^2)^2}}$$

997

998 where *rep* and *disc* are replication and discovery, respectively. Alpha was then inverse-  
999 variance meta-analysed across all SNPs to test for collective evidence that the discovery  
1000 SNPs influence longevity.

1001

1002

### 1003 **Age and sex-stratified effects**

1004 Calculation of age and sex stratified effect sizes was done using the full Cox model (Equation  
1005 1), imputed dosages and the package “Survival” in R. We split the full analysis into age  
1006 decades from 40 to 90 and a wider band, 90-120, beyond that, excluding any parent who died  
1007 at an age younger than the age band and treating any parent who died beyond the age band  
1008 as alive at the end of the age band. We thus had, across independent periods of life, estimates  
1009 of the hazard ratio by decade of age and parent sex, along with standard errors. This gave  
1010 estimates of the hazard ratio beta(age band, sex) in each age band and sex.

1011 We tested the effect of age and sex, by fitting the linear model beta(age band, sex) = intercept  
1012 + beta1 x ageband + beta2 x sex + e, where e is independent, but with known variance (the  
1013 square of the SE in the age/sex stratified model fit) and using the rma function from the R  
1014 package “metafor” which uses **known** variances of dependent variables. The process is more  
1015 easily understood by examining the age and sex related effect size graphs, and recognising  
1016 we are fitting an age and sex as explanatory variables, considering the standard error of each  
1017 point shown.

1018

1019

### 1020 **Causal gene prediction**

1021 In order to more accurately implicate causal genes and methylation sites from the detected  
1022 loci associated with human lifespan, Summary-level Mendelian Randomisation (SMR) and  
1023 HEterogeneity In InDependent Instruments (HEIDI) tests(49) were performed on our

1024 combined discovery and replication CES statistics. Three separate analyses were performed.  
1025 First, cis-eQTL scan results from peripheral blood tissue from two previous studies, the Westra  
1026 data(50) and CAGE data (51), were used to prioritize causal genes. Second, cis-eQTL signals  
1027 (SNPs with FDR < 0.05) for 48 tissues from the GTEx consortium (52) were used to prioritize  
1028 causal genes in multiple tissues. Third, genome-wide methylation QTL (mQTL) scan signals  
1029 in blood tissue from the Brisbane Systems Genetics Study and Lothian Birth Cohort (53) were  
1030 used to predict causal CpG sites associated with human lifespan loci. All results from SMR  
1031 test passing a 5% FDR threshold where the HEIDI test  $P > 0.05$  were reported.

1032  
1033

#### 1034 **Fine-mapping using LASSO regression**

1035 Selection Operator for JOint multi-SNP analysis (SOJO) (54) was used to perform conditional  
1036 fine-mapping analysis of the lifespan loci. The SOJO procedure implements LASSO  
1037 regression for each locus, which outperforms standard stepwise selection procedure (e.g.  
1038 GCTA-COJO), based on summary association statistics and the European-ancestry 1000  
1039 Genomes samples for LD reference. We based the SOJO analysis on our CES summary  
1040 association statistics from the discovery population and used the replication cohort as  
1041 validation sample to optimise the LASSO tuning parameters for each locus. Loci were defined  
1042 prior to analysis as 1Mb windows centred at each top variant from the GWAS. For each locus,  
1043 based on discovery data, we recorded the first 30 variants entering the model and the tuning  
1044 parameters for these entering points along the LASSO path, as well as the LASSO results at  
1045 the tuning parameters. For each recorded tuning parameter, we then built a polygenic score  
1046 and computed the proportion of predictable variance from the regional polygenic score in the  
1047 validation sample. The best out-of-sample R squared is reported, together with the selected  
1048 variants per locus.

1049  
1050

#### 1051 **Identification of disease traits underpinning variation in lifespan**

1052 For the lead lifespan SNPs, we used UK Biobank and PhenoScanner(25) to see if we could  
1053 identify disease pathways underpinning the longevity effects and also provide supporting  
1054 evidence for the plausibility of the lifespan effects. Because the UK Biobank analysis is reusing  
1055 the same samples, there is a risk of chance associations with lifespan being caused by chance  
1056 associations with disease (due to correlation between the two phenotypes), but for true  
1057 associations, the data is more comparable across SNPs. We tested lead SNPs and  
1058 candidates from Table 1 but loci that were only significant under iGWAS were precluded from  
1059 this analysis due to the potential circularity arising from the prior focus on disease-inducing  
1060 SNPs in building of the prior for iGWAS.

1061  
1062

#### 1063 **UK Biobank Disease-Wide Association Study**

1064 SNPs reaching genome-wide significance in the discovery cohort GWAS, combined discovery  
1065 and replication GWAS, as well as candidate SNPs, were tested for association with self-  
1066 reported diseases in the discovery sample of 325,292 unrelated, genomically British subjects,  
1067 their siblings, and each parent separately. Diseases of subject relatives were already coded  
1068 into broad disease categories by UK Biobank. For offspring, ICD codes had been recorded  
1069 which we grouped into similar categories (hypertension, cerebral infarction, heart disease,  
1070 diabetes, dementia, depression, stress, pulmonary disease, and cancer, in accordance with  
1071 Table S16, although cancer in subjects was more directly taken as the trait of reporting number  
1072 of cancers >0). The trait of reporting these diseases (separately for each relative and the  
1073 subject themselves) was then tested for association with genotypic dosage for our candidate  
1074 SNPs. The model fitted was a logistic regression of **not** reporting the disease, using the same  
1075 covariates as the main analysis with the addition of subject age, and estimated the log odds  
1076 ratio of protection from disease for each copy of the lifespan protective allele. Statistically  
1077 significant results were corrected for multiple testing using Benjamini-Hochberg with an FDR  
1078 threshold of 5%. Diseases were then grouped into broader categories, and number of

1079 protective (+) or deleterious (-), corresponding to the sign of the log odds ratio, associations  
1080 were counted for each variant. Each lead SNP could associate many times with a disease  
1081 category, as repeated associations across relatives, or diseases within the category (or both)  
1082 might be found (Table S17).

1083

1084 Lead SNPs from the discovery GWAS, combined discovery and replication GWAS, as well as  
1085 candidate SNPs and close proxies ( $r^2 > 0.8$ ), were scanned for known associations using  
1086 PhenoScanner(25). All associations passing a 5% FDR threshold were divided using  
1087 keywords into broad disease categories or “other”, which were then further curated. These  
1088 categories were CVD – Cardiovascular diseases and risk factors, such as myocardial  
1089 infarction, aortic valve calcification, hypertension, and cholesterol and triglyceride levels;  
1090 IMMUNE – autoimmune and chronic inflammation disorders, such as type 1 diabetes,  
1091 rheumatoid arthritis, systemic lupus erythematosus, inflammatory bowel diseases, and  
1092 autoimmune liver and thyroid disease; PULMONARY – pulmonary function and disease (exc.  
1093 cancer): asthma, chronic pulmonary obstructive disorder, respiratory function and airflow  
1094 obstruction; DIABETES – type 2 diabetes and risk factors including glucose, HbA1c, and  
1095 insulin levels; OBESITY – Anthropometric measures such as BMI, body fat percentage,  
1096 waist/hip circumference, weight, and obesity; NEURO – Neurological disorders, such as  
1097 Alzheimer’s, Parkinson’s, and Huntington’s disease, as well as depression, smoking addiction,  
1098 and neuroticism. CANCER – Any association with cancer. Identical traits (such as “LDL”,  
1099 “cholesterol LDL”, and “Serum LDL C”) and similar traits (such as “Childhood BMI”, “BMI in  
1100 females”, and “BMI in males”) were grouped, keeping only the strongest association. In total,  
1101 there were 131 unique traits of which 61 could be classified into one of the categories (15  
1102 CVD, 7 OBESITY, 14 NEURO, 4 DIABETES, 15 IMMUNE, 4 PULMONARY, 2 CANCER)  
1103 (Table S18).

1104

1105

### 1106 **Lifespan variance explained**

1107 As our tests of association with disease of lifespan SNPs in UK Biobank depended on power,  
1108 reflecting the UK Biobank sample structure and (parental) disease prevalence, or the study  
1109 designs underpinning PhenoScanner, we sought an independent, large set of disease-  
1110 associated SNPs with strong effects on lifespan. A large number of SNPs per disease  
1111 category, especially other cancers, were used to ensure that diseases were not under-  
1112 represented when testing for association with lifespan. The latest, genome-wide significant  
1113 disease SNPs from European ancestry studies were retrieved from the GWAS catalog (14  
1114 March 2018), based on string matching within reported trait names. For Alzheimer’s /  
1115 Parkinson’s disease, these were “alz” and “parkin”; for CVD, these were “myocard”, “cvd”,  
1116 “cardiovascular”, “coronary”, and “artery disease”; for Type 2 diabetes this was “type 2  
1117 diabetes”; for cancers, this was “cancer”, “noma”, “ioma”, “tumo[u]r”, and “leukemia”. Cancers  
1118 were then divided in Lung cancer and Other cancers based on the presence or absence of  
1119 the keyword “lung”. The Smoking / Lung cancer category was created by adding traits  
1120 containing the keywords “smoking” and “chronic obstructive” to the lung cancers. Each  
1121 category was manually checked to include only associations with the diseases themselves or  
1122 biomarkers of the diseases. Although some throat cancers are often caused by smoking and  
1123 alcohol consumption, we did not treat these as smoking loci; in practice, this choice had no  
1124 effect as the only significant throat cancer locus (oesophageal cancer near CFTR) was  
1125 discounted as secondary pleiotropic – see below.

1126

1127 SNPs missing from the CES meta-analysis summary statistics were imputed from the closest  
1128 proxy (min.  $r^2 > 0.9$ ) or averaged from multiple proxies if equally close. SNPs without effect  
1129 sizes, SNPs matching neither our reference nor effect alleles, and SNPs with reported  
1130 frequencies differing by more than 0.3 from our own were excluded. The remaining SNPs were  
1131 subdivided into independent ( $r^2 < 0.1$ ) loci 500kb apart, keeping the SNP most strongly  
1132 associated with lifespan in the CES meta-analysis – thus proportional to the lifespan GWAS  
1133 test statistic rather than disease structure in UK Biobank. Lastly, where possible, loci were

1134 tested for association with their disease category in UK Biobank parents and siblings (using  
1135 the same models as our disease-wide association study). Effects reported in the GWAS  
1136 catalog for which we found the pooled estimate from our association study was in the opposite  
1137 direction were flipped (if  $P < 0.05$ ) or discarded (if  $P \geq 0.05$ ).

1138  
1139 Our final dataset consisted of 555 disease SNPs (81 neurological, 72 cardiovascular, 65  
1140 diabetes, 22 smoking/lung cancer, and 315 other cancers). Lifespan variance explained (LVE)  
1141 was calculated as  $2pqa^2$ , where  $p$  and  $q$  are the frequencies of the effect and reference alleles  
1142 in our lifespan GWAS, and  $a$  is the SNP effect size in years of life(55). To assess pleiotropy,  
1143 SNPs were tested against other disease categories, and where possible, the relative strengths  
1144 of standardised associations between disease categories were compared. SNPs associating  
1145 more strongly with another disease, as defined by a Z statistic more than double that of the  
1146 original disease, were marked as pleiotropic and secondary. Whilst strength of association  
1147 would not normally be perceived as appropriately measured in this way (odds ratio being more  
1148 conventional and independent of prevalence), here we are interested in the excess number of  
1149 disease cases in the population due to the variant, so any locus with a moderate OR for a  
1150 highly prevalent disease is judged more causative of that disease than a locus with a  
1151 (somewhat) higher OR for a very rare disease, as the number of attributable cases will be  
1152 lower. The Z statistic captures this – given that  $p$  and  $q$  are obviously the same (same SNP,  
1153 same population). Correspondingly, for diseases only present in one sex, the other sex was  
1154 treated as all controls. Whilst this halves the apparent effect size, the required measure is the  
1155 amount of disease caused across the whole population. A SNP conferring similar attributable  
1156 counts of CVD and breast cancer in women, but also CVD in men, is causing CVD more than  
1157 cancer across the population. Correspondingly selection pressure on the breast cancer effect  
1158 is half that for a matching effect in both sexes. SNPs conferring both an increase in disease  
1159 and an increase in lifespan were marked as antagonistically pleiotropic. Unsurprisingly, in  
1160 practice, there were one or more other diseases reduced by the SNP and therefore the  
1161 reported disease-increasing association was considered secondary. Total LVE per disease  
1162 category was calculated by summing SNPs not marked as secondary and with significant  
1163 effects on lifespan, where significance was determined by setting an FDR threshold that  
1164 allowed for 1 false positive among all SNPs tested ( $q \leq 0.016$ , 60 SNPs). To compare the  
1165 cumulative LVE of the top LVE loci, all non-secondary association SNPs from the disease  
1166 categories were pooled and again subdivided into independent loci ( $r^2 < 0.1$ ) 500kb apart.  
1167 Applying an FDR threshold with the same criteria ( $q \leq 0.022$ ), a total of 45 (1 neurological, 23  
1168 cardiovascular, 4 diabetes, 6 smoking/lung cancer, and 11 other cancer) independent loci  
1169 remained and their LVE was summed by disease category.

1170

1171

### 1172 **Tissue and pathway enrichment**

1173 LD-score regression (57) indicated that between the CES and PDES discovery and discovery-  
1174 replication meta results, the CES discovery sample had the highest SNP heritability, plausibly  
1175 due to its uniformity of population sample. Stratified LD-score regression(56) partitions SNP  
1176 heritability into regions linked to specific tissues and cell types, such as super-enhancers and  
1177 histone marks, and then assesses whether the SNPs in these regions contribute  
1178 disproportionately to the total SNP heritability. The CES statistics were selected and analysed  
1179 using the procedure described by Finucane et al. (56), which included limiting the regressions  
1180 to HapMap3 SNPs with  $MAF > 0.05$  to reduce statistical noise. Results from all cell types were  
1181 merged and then adjusted for multiple testing using Benjamini–Hochberg (FDR 5%).

1182

1183 The CES discovery-replication meta-analysis dataset was subjected to gene-based tests,  
1184 which used up to  $10^6$  SNP permutations per gene to assign P values to 26,056 genes, as  
1185 implemented by VEGAS2 v2.01.17(58) Only directly genotyped SNPs from the UK Biobank  
1186 array were used to facilitate practical runtimes. Using the default settings, all SNPs located  
1187 within genes (relative to the 5' and 3' UTR) were included. Scored genes were then tested for  
1188 enrichment in 9,741 pathways from the NCBI BioSystems Database with up to  $10^8$  gene



1189 permutations per pathway using VEGAS2Pathway(59). Pathway enrichment P values were  
1190 automatically adjusted for pathway size (empirical P) and further adjusted for multiple testing  
1191 using Benjamini-Hochberg (FDR 5%).

1192  
1193 DEPICT was also used to create a list of genes; however, this method uses independent SNPs  
1194 passing a P value threshold to define lifespan loci and then attempts to map 18,922 genes to  
1195 them. Gene prioritization and subsequent gene set enrichment is done for 14,461  
1196 probabilistically-defined reconstituted gene sets, which are tested for enrichment under the  
1197 self-contained null hypothesis (60). Two separate analyses were performed on the combined  
1198 CES discovery-replication summary statistics, using independent SNPs (>500kb between top  
1199 SNPs) which were present in the DEPICT database. The first analysis used a genome-wide  
1200 significance threshold (GW DEPICT analysis) and mapped genes to 10 loci, automatically  
1201 excluding the major histocompatibility complex (MHC) region. The second used a suggestive  
1202 significance threshold ( $P < 10^{-5}$ ), which yielded 93 loci and mapped genes to 91 of these,  
1203 again excluding the MHC region. To test if pathways were significantly enriched at a 5% FDR  
1204 threshold, we used the values calculated by DEPICT, already adjusted for the non-  
1205 independence of the gene sets tested.

1206  
1207 PASCAL was used with the same summary statistics and gene sets as DEPICT, except the  
1208 gene probabilities within the sets were dichotomized ( $Z > 3$ ) (62), leading to the analysis of the  
1209 same 14,461 pathways. PASCAL transformed SNP P values into gene-based P values (with  
1210 default method "--genescore=sum") for 21,516 genes (61). When testing the pathways for  
1211 overrepresentation of high gene scores, the P values are estimated under the competitive null  
1212 hypothesis (69). These pathway empirical P values were further adjusted for multiple testing  
1213 using Benjamini-Hochberg procedure.

1214  
1215

### 1216 **Age-related eQTLs enrichment**

1217 We identified SNPs in our GWAS (discovery plus replication combined CES) that were eQTLs  
1218 i.e. associated with the expression of at least one gene with  $P < 10^{-4}$  in a dataset provided to  
1219 us by the eQTLGen Consortium (n=14,155 individuals). A total of 2,967 eQTLs after distance  
1220 pruning (500kb) were present, of which 500 were associated with genes differentially  
1221 expressed with age (34). We used Fisher's exact test to determine, amongst the set of eQTLs,  
1222 if SNPs which were associated with lifespan (at varying thresholds of statistical significance)  
1223 were enriched for SNPs associated with genes whose expression is age-related.

1224  
1225

### 1226 **Polygenic lifespan score associations**

1227 We used the combined discovery and replication CES GWAS, excluding (one at a time) all  
1228 Scottish populations (whether from Scottish UK Biobank assessment centres or Scottish  
1229 LifeGen cohorts), Estonian populations and a random 10% of UK Biobank English and Welsh  
1230 subjects to create polygenic risk scores using PRSice (63), where the test subjects had not  
1231 been part of the training data. As we find polygenic risk scores developed using all ( $P \leq 1$ )  
1232 independent ( $r^2 < 0.1$ ) SNPs (PRSP1), rather than those passing a tighter significance  
1233 threshold are most predictive (highest standardised effect size; see Table S25 for comparison  
1234 between thresholds), these were used in the prediction analysis.

1235 To make cross-validated lifespan predictions using polygenic scores, our unrelated,  
1236 genomically British sample was partitioned into training and test sets. The first test set  
1237 consisted of Scottish individuals from UK Biobank, as defined by assessment centre or  
1238 northings and eastings falling within Scotland (N = 24,059). The second set consisted of a  
1239 random subset of the remaining English and Welsh population, reproducibly sampled based  
1240 on the last digit of their UK Biobank identification number (#7, N = 29,815). The training set  
1241 was constructed by excluding these two populations, as well as excluding individuals from  
1242 Generation Scotland, from our GWAS and recalculating estimates of beta on that subset.

1243

1244 A third independent validation set was constructed by excluding the EGCUT cohort from the  
1245 LifeGen sample and using the remaining data to predict lifespan in the newly genotyped  
1246 EGCUT cohort(70), using unrelated individuals only (N = 36,499).

1247  
1248 Polygenic survival scores were constructed using PRSice 2.0.14.beta(63) in a two-step  
1249 process. First, lifespan SNPs were LD-clumped based on an  $r^2$  threshold of 0.1 and a window  
1250 size of 250kb. To facilitate practical run times of PRSice clumping, only directly genotyped  
1251 SNPs were used in the Scottish and English/Welsh subsets. The Estonian sample was  
1252 genotyped on four different arrays with limited overlap, so here imputed data (with imputation  
1253 measure  $R^2 > 0.9$ ) was used and clumped with PLINK directly ( $r^2 = 0.1$ ; window = 1000kb). The  
1254 clumped SNPs (85,539 in UK Biobank, 68,234 in Estonia) were then further pruned based on  
1255 several different P value thresholds, to find the most informative subset. For all individuals, a  
1256 polygenic score was calculated as the sum of SNP dosages (of SNPs passing the P value  
1257 threshold) multiplied by their estimated allele effect. These scores were then standardised to  
1258 allow for associations to be expressed in standard deviations in polygenic scores.

1259  
1260 Polygenic scores of test cohorts were regressed against lifespan and alive/dead status using  
1261 a cox proportional hazards model, adjusted for sex, assessment centre, batch, array, and 10  
1262 principal components. Where parental lifespan was used, hazard ratios were doubled to gain  
1263 an estimate of the polygenic score on own mortality. Scores were also regressed against  
1264 diseases using a logistic regression adjusted for the same covariates plus subject age. As  
1265 with previous disease associations, estimates were transformed so positive associations  
1266 indicate a protective or life-extending effect, and effect estimates of first degree relatives were  
1267 doubled. Meta-analysis of estimates between cohorts was done using inverse variance  
1268 weighting. Where estimates between kin were meta-analysed, standard errors were adjusted  
1269 for correlation between family members. This involved multiplying standard errors by  $\sqrt{1+r}$   
1270 for each correlation (r) with the reference kin (Equation 2), which appears slightly conservative.  
1271 As correlations between family member diseases were very low (range 0.0005 to 0.1048), in  
1272 practice, this adjustment had no effect.

1273  
1274

### 1275 **Sensitivity of annuity prices to age**

1276 Market annuity rates for life annuities in January 2018 written to 55, 60, 65, and 70 year olds  
1277 were obtained from the sharing pensions website  
1278 [http://www.sharingpensions.com/annuity\\_rates.htm](http://www.sharingpensions.com/annuity_rates.htm) (accessed 22 January 2018) and were  
1279 £4158, £4680, £5476, £6075, £7105 respectively per year for a £100,000 purchase price. The  
1280 arithmetic average increase from one quinquennial age to the next is 14 percent.

1281  
1282

### 1283 **URLs**

1284 MultiABEL: <https://github.com/xiashen/MultiABEL/>  
1285 LDSC: <https://github.com/bulik/ldsc>  
1286 SMR/HEIDI: <https://cnsgenomics.com/software/smr/>  
1287 SOJO: <https://github.com/zhenin/sojo/>  
1288 DEPICT: <https://www.broadinstitute.org/mpg/depict/>  
1289 PASCAL: <https://www2.unil.ch/cbg/index.php?title=Pascal>  
1290 GTEx: <https://gtexportal.org/home/datasets>

1291  
1292

### 1292 *Acknowledgements*

1293

1294 We thank the UK Biobank Resource, approved under application 8304; we acknowledge  
1295 funding from the UK Medical Research Council Human Genetics Unit, Wellcome Trust PhD  
1296 Training Fellowship for Clinicians, the Edinburgh Clinical Academic Track (ECAT) programme  
1297 (204979/Z/16/Z), the Medical Research Council Doctoral Training Programme  
1298 (MR/N013166/1) and the AXA research fund. We thank Tom Haller of the University of Tartu,

1299 for tailoring RegScan so we could use it with compressed files(65). We would also like to thank  
1300 the researchers, funders and participants of the LifeGen consortium(5).

1301

1302

1303 *Contributions*

1304

1305 PRJHT, NM, KL, KF, ZN, XF, AB, DC performed analyses.

1306 TE, eQTLGen contributed data

1307 XS, TE, KF, ZK, PKJ designed the experiments

1308 PRJHT, NM, KL, KF, AB, XS, TE, ZK, JFW, PKJ wrote the manuscript

1309

1310 *Additional Information*

1311

1312 eQTLGen Consortium

1313

1314 Agbessi M<sup>1</sup>, Ahsan H<sup>2</sup>, Alves I<sup>1</sup>, Andiappan A<sup>3</sup>, Awadalla P<sup>1</sup>, Battle A<sup>4</sup>, Beutner F<sup>5</sup>, Bonder  
1315 MJ<sup>6</sup>, Boomsma D<sup>7</sup>, Christiansen M<sup>8</sup>, Claringbould A<sup>6</sup>, Deelen P<sup>6</sup>, van Dongen J<sup>7</sup>, Esko T<sup>9</sup>,  
1316 Favé M<sup>1</sup>, Franke L<sup>6</sup>, Frayling T<sup>10</sup>, Gharib SA<sup>11</sup>, Gibson G<sup>12</sup>, Hemani G<sup>13</sup>, Jansen R<sup>7</sup>,  
1317 Kalnapekns A<sup>9</sup>, Kasela S<sup>9</sup>, Kettunen J<sup>14</sup>, Kim Y<sup>4</sup>, Kirsten H<sup>15</sup>, Kovacs P<sup>16</sup>, Krohn K<sup>17</sup>,  
1318 Kronberg-Guzman J<sup>9</sup>, Kukushkina V<sup>9</sup>, Kutalik Z<sup>18</sup>, Kähönen M<sup>19</sup>, Lee B<sup>3</sup>, Lehtimäki T<sup>20</sup>, Loeffler  
1319 M<sup>15</sup>, Marigorta U<sup>12</sup>, Metspalu A<sup>9</sup>, van Meurs J<sup>21</sup>, Milani L<sup>9</sup>, Müller-Nurasyid M<sup>22</sup>, Nauck M<sup>23</sup>,  
1320 Nivard M<sup>7</sup>, Penninx B<sup>7</sup>, Perola M<sup>24</sup>, Pervjakova N<sup>9</sup>, Pierce B<sup>2</sup>, Powell J<sup>25</sup>, Prokisch H<sup>26</sup>, Psaty  
1321 BM<sup>27</sup>, Raitakari O<sup>28</sup>, Ring S<sup>29</sup>, Ripatti S<sup>14</sup>, Rotzschke O<sup>3</sup>, Ruëger S<sup>18</sup>, Saha A<sup>4</sup>, Scholz M<sup>15</sup>,  
1322 Schramm K<sup>22</sup>, Seppälä I<sup>20</sup>, Stumvoll M<sup>30</sup>, Sullivan P<sup>31</sup>, Teumer A<sup>32</sup>, Thiery J<sup>33</sup>, Tong L<sup>2</sup>, Tönjes  
1323 A<sup>30</sup>, Verlouw J<sup>21</sup>, Visscher PM<sup>25</sup>, Vösa U<sup>6</sup>, Völker U<sup>34</sup>, Yaghoobkar H<sup>10</sup>, Yang J<sup>25</sup>, Zeng B<sup>12</sup>,  
1324 Zhang F<sup>25</sup>

1325

1326 1 Ontario Institute for Cancer Research Toronto Canada

1327 2 Department of Public Health Sciences University of Chicago Chicago United States of  
1328 America

1329 3 Singapore Immunology Network Agency for Science, Technology and Research Singapore  
1330 Singapore

1331 4 Department of Computer Science Johns Hopkins University Baltimore United States of  
1332 America

1333 5 Heart Center Leipzig Universität Leipzig Leipzig Germany

1334 6 Department of Genetics University Medical Centre Groningen Groningen The Netherlands

1335 7 Vrije Universiteit Amsterdam The Netherlands

1336 8 Cardiovascular Health Research Unit University of Washington Seattle United States of  
1337 America

1338 9 Estonian Genome Center University of Tartu Tartu Estonia

1339 10 Exeter Medical School University of Exeter Exeter United Kingdom

1340 11 Department of Medicine University of Washington Seattle United States of America

1341 12 School of Biological Sciences Georgia Tech Atlanta United States of America

1342 13 MRC Integrative Epidemiology Unit University of Bristol Bristol United Kingdom

1343 14 University of Helsinki Helsinki Finland

1344 15 Institut für Medizinische Informatik, Statistik und Epidemiologie, LIFE – Leipzig Research  
1345 Center for Civilization Diseases Universität Leipzig Leipzig Germany

1346 16 IFB Adiposity Diseases Universität Leipzig Leipzig Germany

1347 17 Interdisciplinary Center for Clinical Research, Faculty of Medicine Universität Leipzig  
1348 Leipzig Germany

1349 18 Lausanne University Hospital Lausanne Switzerland

1350 19 Department of Clinical Physiology Tampere University Hospital and Faculty of Medicine  
1351 and Life Sciences, University of Tampere Tampere Finland

1352 20 Department of Clinical Chemistry Fimlab Laboratories and Faculty of Medicine and Life  
1353 Sciences, University of Tampere Tampere Finland

1354 21 Department of Internal Medicine Erasmus Medical Centre Rotterdam The Netherlands  
1355 22 Institute of Genetic Epidemiology, Helmholtz Zentrum München, German Research Center  
1356 for Environmental Health, Neuherberg, Germany  
1357 23 Institute of Clinical Chemistry and Laboratory Medicine University Medicine Greifswald  
1358 Greifswald Germany  
1359 24 National Institute for Health and Welfare University of Helsinki Helsinki Finland  
1360 25 Institute for Molecular Bioscience University of Queensland Brisbane Australia  
1361 26 Institute of Human Genetics Helmholtz Zentrum München München Germany  
1362 27 Cardiovascular Health Research Unit, Departments of Epidemiology, Medicine, and Health  
1363 Services University of Washington Seattle United States of America  
1364 28 Department of Clinical Physiology and Nuclear Medicine Turku University Hospital and  
1365 University of Turku Turku Finland  
1366 29 School of Social and Community Medicine University of Bristol Bristol United Kingdom  
1367 30 Department of Medicine Universität Leipzig Leipzig Germany  
1368 31 Department of Medical Epidemiology and Biostatistics Karolinska Institutet Stockholm  
1369 Sweden  
1370 32 Institute for Community Medicine University Medicine Greifswald Greifswald Germany  
1371 33 Institute for Laboratory Medicine, LIFE – Leipzig Research Center for Civilization Diseases  
1372 Universität Leipzig Leipzig Germany  
1373 34 Interfaculty Institute for Genetics and Functional Genomics University Medicine Greifswald  
1374 *SI Appendix*  
1375  
1376

1377 **SI Appendix - section 1: Implication of causal genes and methylation sites**

1378

1379 SMR-HEIDI implicates specific causal genes within identified gene regions by finding similar  
1380 patterns in SNP effects on gene expression and the trait in question(49). Cis-eQTL scan  
1381 results from two previous studies on peripheral blood tissue, Westra (50) and CAGE (51),  
1382 were used to prioritize causal genes within loci reaching genome-wide significance in our  
1383 discovery GWAS, combined cohort GWAS, or iGWAS. We also included *d3-GHR*,  
1384 *5q33.3/EBF1*, and *FOXO3* in the analysis.

1385

1386 At a 5% FDR threshold for SMR and a  $P > 0.05$  threshold for HEIDI test, 11 genes (*PSRC1*,  
1387 *ARPC1B*, *SH2B3*, *PSMA4*, *FES*, *FURIN*, *OCIAD1*, *BECN1*, *ATP6V0A1*, *KANK2*, and *SESN1*)  
1388 are implicated in 9 separate gene regions (Table S5).

1389

1390 In order to expand the SMR-HEIDI analysis to other human tissues, we extracted cis-eQTL  
1391 (SNPs with  $FDR < 5\%$ ) signals for 48 tissues from the GTEx consortium(52). At a 5% FDR  
1392 threshold for SMR and a  $P > 0.05$  threshold for HEIDI test, 27 unique genes from 11 loci  
1393 across 25 tissues are implicated as causal (Table S12). Of these, the six most statistically  
1394 robust associations ( $FDR < 1\%$ ) are (tissue:gene) Muscle Skeletal:*CELSR2*, Liver:*PSRC1*,  
1395 Cells Transformed fibroblasts:*FES*, Liver:*CELSR2*, Esophagus Mucosa:*PSRC1*, Cells  
1396 Transformed fibroblasts:*BECN1*.

1397

1398 We also extended the SMR-HEIDI test to genome-wide methylation QTL (mQTL) scan signals  
1399 (blood tissue)(53) from BSGS and LBC studies, so that causal CpG sites associated with the  
1400 human lifespan GWAS signals can be predicted. All results from SMR test with a 5% FDR  
1401 threshold where the HEIDI test  $P > 0.05$  were reported (Table S13). 57 sites at 16 loci were  
1402 implicated as to having causal effects on the lifespan including some within loci with  
1403 established biological relevance to lifespan (*CHRNA3/5*, *APOE*, and *LPA*) which the eQTL  
1404 dataset may not have had sufficient power to reveal. The 9 most statistically significant results  
1405 ( $FDR < 0.1\%$ ) were for (gene region: CpG probe) *CHRNA3/5*:cg04882995,  
1406 *CHRNA3/5*:cg04140906, *CLU*:cg26027576, *FURIN/FES*:cg05469396, *LAMA5*:cg24112000,  
1407 *ARPC1*:cg04083712, *BECN1*:cg04987362, *HLA-DQA1*:cg18060330, and *HLA-*  
1408 *DQA1*:cg06871764.

## 1409 **SI Appendix - section 2: Disease associations of lead lifespan SNPs**

1410

1411 We see three variants (at or near *ATXN2/BRAP*, *CDKN2B-AS1* and *LPA*) with multiple  
1412 protective associations against CVD associating with a risk increase in self-reported cancer.  
1413 Additionally, 8 loci (at or near 13q21.33, *CLU*, *HLA-DQA1*, *HIST1*, *LAMA5*, *PSORS1C3*,  
1414 *MICA/MICB*, *EGLN2/CYP2A6*) show a protective effect on cancer and no statistically  
1415 significant association with CVD. Of these, all but two associations are protective from lung  
1416 cancer, the exceptions being *HLA-DQA1*, which associates with reduced respiratory disease  
1417 and cancer in general, and *LAMA5*, which associates with reduced bowel cancer. For  
1418 diabetes, we see lifespan-increasing variants with a protective effect at or near *CDKN2B-AS1*,  
1419 *ATXN2/BRAP*, *MAGI3*, *TMEM18*, *CHW43*, *HP*, *BECN1*, *PSORS1C3*, and *EXOC3L2/MARK4*,  
1420 but with deleterious associations on diabetes at or near *CELSR2/PSRC1*, *LDLR* and *APOE*.  
1421 For neurological diseases, we see 4 protective associations, all from the life-lengthening  
1422 variant near *APOE*, and 5 deleterious associations from SNPs at or near *CLU*, *FURIN/FES*,  
1423 *KCNK3* and *EXOC3L2/MARK4*. Finally, for pulmonary diseases, we see lifespan increasing  
1424 variants with a protective effect in 9 analyses (in loci at or near *HLA-DQA1*, *CHRNA3/5*,  
1425 *CHRNA4*, *TMEM18*, *MICA/MICB*, *FOXO3*, and *SEMA6D*), but with deleterious effects for the  
1426 life lengthening allele at or near *LPA* and *APOE*. Conversely, when considering the disease  
1427 associations SNP-by-SNP, we found that 16 out of our 25 genome-wide significant longevity  
1428 variants had more than one protective association with the diseases considered. Of the 11  
1429 SNPs for which we found replication, 9 SNPs have more than one protective association with  
1430 disease, *ZW10* and 13q21.31 being the exceptions. Furthermore, lead SNPs at or near  
1431 *CELSR2/PSRC1*, *LPA*, *CDKN2B-AS1*, *ATXN2/BRAP*, *CHRNA3/5*, *FURIN/FES*, *APOE*,  
1432 *KCNK3* and *IGF2R* showed 5 or more protective associations. Three variants (at or near *LPA*,  
1433 *CLU*, and *APOE*) with life-lengthening associations also showed more than one deleterious  
1434 association with disease.

1435

1436 Lookup of genome-wide significant SNPs and candidate SNPs on PhenoScanner (25),  
1437 together with their closest proxies ( $r^2 > 0.8$ ), show very similar patterns of association, but  
1438 now in independent data (again loci that were only significant under iGWAS were precluded).  
1439 We grouped phenotypes by broad disease category or obesity as summarised in Table S7  
1440 (for definition of the disease categories see Methods and see Table S18 for full detail). In  
1441 particular, of the 210 unique PhenoScanner disease associations (FDR < 5%) found for the  
1442 45 SNPs, 80 associations were with CVD (especially at or near *CELSR2/PSRC1*,  
1443 *ATXN2/BRAP*, *LDLR*, *LPA*, *CDKN2B-AS1*, and *HP*), and 48 were with obesity traits  
1444 (especially at or near *TMEM18*, *ATXN2/BRAP*, *FOXO3*, and *KCNK3*). Of the remaining 82  
1445 associations, 33 were for neurological disorders and addiction (primarily at or near  
1446 *FURIN/FES* and *CHRNA3/5*), 33 were for immune disorders (almost half near *ATXN2/BRAP*,  
1447 and a third near *MAGI3* and *MICA/MICB*), 8 were for type 2 diabetes risk factors, 6 were for  
1448 pulmonary disorders (mostly near *CHRNA3/5*), and two were for cancers (one lung cancer,  
1449 one glioma). Conversely when considering PhenoScanner associations SNP-by-SNP, we  
1450 found 8 or more statistically significant disease associations for each of the lead SNPs at or  
1451 near *ATXN2/BRAP*, *CELSR2/PSRC1*, *CHRNA3/5*, *FOXO3*, *HIST1*, *MICA/MICB*, *TMEM18*,  
1452 *FURIN/FES*, and *HP*, mostly concordant with our own PheWAS and supporting their putative  
1453 roles in lifespan. At the same time, we found 2 or fewer statistically significant disease  
1454 associations for lead SNPs at or near 13q21.31, 13q21.33, *ANKRD20A9P*, *BECN1*, *CHRNA4*,  
1455 *CHW43*, *FPGT/TNNI3K*, *LAMA5*, *SEMA6D*, *USP2-AS1*, *USP42*, *BEND3*, *d3-GHR*, *MC2R*,  
1456 *TMTC2*, *ZW10*, *ARPC1*, *EXOC3L2/MARK4*, *IL6*, *TOX*.

1457

1458 These disease associations are broadly consistent with mortality risk factor associations from  
1459 our iGWAS. When performing a lookup of 1% FDR iGWAS SNPs in the mortality risk factor  
1460 studies underpinning the iGWAS, we find the lead genome-wide significant loci either show  
1461 strong clustering of blood lipids and cardiovascular disease, moderate clustering of metabolic  
1462 and neurological traits, or weak but highly pleiotropic clustering amongst many of the traits  
1463 considered (Fig. S9).

1464

1465 We next looked up the 82 FDR < 1% iGWAS SNPs within the 16 risk factor GWAMAs used to  
1466 form the iGWAS prior. As the iGWAS had enriched SNPs with disease associations, this was  
1467 not an unbiased sample; nonetheless, the pattern of association is still of interest. Using a  
1468 Bonferroni corrected (16 traits, 82 SNPs) threshold of  $3.81 \times 10^{-5}$ , we find 52 associations  
1469 between our identified lifespan SNPs and risk factors. Education Level (years of schooling -  
1470 10), LDL Cholesterol (9) BMI (8), Coronary Artery Disease (8) show the highest number of  
1471 statistically significant associations. Conversely SNPs near *CELSR2/PSRC1* and  
1472 *BUD13/APOA5* show evidence of pleiotropy, with associations with three or more risk factors  
1473 (Table S10).

### 1474 **SI Appendix - section 3: Extended Discussion**

1475

1476 The functions, in the context of lifespan and longevity, of the newly replicated loci *CDKN2B-*  
1477 *AS1*, *ATXN2/BRAP*, and 5q33.3/*EBF1* have been described in detail previously (6, 15).  
1478 Briefly, variants within these loci are known to play a role in cardiovascular disease,  
1479 hypertension, and autoimmune disorders, matching disease associations in our own study.  
1480 Pilling et al. (6) suggest a causal role for *CDKN2B-AS1* lncRNA expression on lifespan, and  
1481 we identify a causal role for *SH2B3* gene expression in the *ATXN2/BRAP* locus, admittedly a  
1482 highly pleiotropic region. The causal element for lifespan near 5q33.3/*EBF1* remains unclear.  
1483

1484 The *FURIN/FES* variant associates with extended lifespan, decreased *FURIN* and increased  
1485 *FES* expression(71). The gene product, Furin, is a pro-protein convertase, linked to  
1486 dysregulation of lipid levels(72) and progression of atherosclerosis(73), matching the  
1487 protective role of the lifespan-increasing variant observed against heart disease and  
1488 hypertension. Despite both proteins playing a role in cancer development – Furin promoting  
1489 metastasis(74, 75) and Fes displaying both pro and anti-tumorigenic effects(76) – we did not  
1490 observe any significant associations between the lead variant and cancer.  
1491

1492 The lifespan-increasing variant rs61905747\_A near *ZW10* is associated with decreased  
1493 expression of *USP28* and increased expression of two uncharacterised pseudogenes(71).  
1494 *USP28* is a deubiquitinase that stabilises the oncogene *MYC*(77) and is upregulated in  
1495 multiple cancers(78-81). While we find no disease associations beyond protection from CVD  
1496 for our lead variant (95% CI logOR -0.10 to -0.03), Law et al. find a proxy in moderate LD  
1497 (rs61904987\_C,  $r^2 \sim 0.6$ ) is associated with decreased chronic lymphocytic leukaemia (95%  
1498 CI logOR -0.28 to -0.15)(82), suggesting decreased *USP28* expression may extend lifespan  
1499 by conferring a protection from CVD and some cancers.  
1500

1501 The variant near *PSORS1C3* is located within a known psoriasis susceptibility locus near *HLA-*  
1502 *C* (83, 84), but the complex LD structure complicates identification of a causal gene. Psoriasis  
1503 is linked to higher risk of myocardial infarction, and life expectancy of men and women with  
1504 severe psoriasis is decreased by an average of 3.5 and 4.4 years, respectively (85). The same  
1505 region has also been linked to lung cancer, follicular lymphoma, and multiple myeloma  
1506 susceptibility (86-88), although we only find an association between the SNP and protection  
1507 against lung cancer.  
1508

1509 The variant within cytogenetic band 13q21.31 is located in a gene desert. However, somatic  
1510 deletion of the 13q21-q22 region is frequently observed in non-*BRCA1/BRCA2* breast cancer,  
1511 suggesting the region contains functional elements involved in tumour suppression(89).  
1512 Altered breast cancer susceptibility would match the female-specific effects on lifespan we  
1513 observed for both intergenic lifespan SNPs 13q21.31 and 13q21.33 within this region.  
1514

1515 Despite the mixed evidence for association we found with lifespan, *CELSR2* is known to affect  
1516 cardiovascular disease in diverse populations (17, 90-92) and the locus is known to have sex-  
1517 specific effects on lipid metabolites (93, 94). It is likely *CELSR2* affects lifespan and in a sex-  
1518 specific way, with our CES replication failing due to sex specificity and the PDES replication  
1519 being (very) slightly underpowered at a 5% significance level ( $P = 0.0565$ ).  
1520

1521  
1522 Our findings validate the results of a previous Bayesian analysis (iGWAS) performed on a  
1523 subset ( $n=116,279$ ) of the present study's discovery sample (35), which highlighted two loci  
1524 which are now genome-wide significant in conventional GWAS in the present study's larger  
1525 sample. iGWAS thus appears to be an effective method able to identify lifespan-associated  
1526 variants in smaller samples than standard GWAS, albeit relying on known biology.  
1527



1528 Lipid metabolites – particularly cholesterol metabolites – have well-established effects on  
1529 atherosclerosis, type-2-diabetes, Alzheimer’s disease, osteoporosis, and age-related cancers  
1530 (95). It is therefore no surprise that lifespan genetics are enriched for lipid metabolism genes,  
1531 considering the mortality risk associated with these diseases. Lipid levels also play a role in  
1532 brain function, with cholesterol being necessary for dendrite differentiation and  
1533 synaptogenesis (96) and altered lipid metabolism causing multiple neurodegenerative  
1534 diseases (97). Pilling et al. (6) implicated nicotinic acetylcholine receptor pathways in human  
1535 lifespan, which we detect at nominal significance ( $P = 2 \times 10^{-4}$ ), but not quite at 5% FDR  
1536 correction ( $q = 0.0556$ ). Instead we highlight more general synapse and dendrite pathways,  
1537 and identify the dorsolateral prefrontal cortex (DLPC) as an ageing-related tissue. Indeed, the  
1538 DLPC, which is involved in smoking addiction (98) and dietary self-control (99), has been  
1539 found to be especially vulnerable to age-related synaptic death (100).

1540  
1541 Whilst it has previously been shown that transcriptomic age calculated based on ARGs is  
1542 meaningful in the sense that its deviation from the chronological age is associated with  
1543 biological features linked to aging (101), the role of ARGs in ageing was unclear. A gene  
1544 might be an ARG because (i) it is a biological clock (higher expression tracking biological  
1545 ageing, but not influencing ageing or disease); (ii) it is a response to the consequences of  
1546 ageing (e.g. a protective response to CVD); (iii) it is an indicator of selection bias: if low  
1547 expression is life-shortening, older people with low expression tend to be eliminated from the  
1548 study, hence the average expression level of older age groups is higher. However, our results  
1549 now show that the differential expression of many of these genes with age is not only a  
1550 biomarker of aging, but the genes identified by Peters et al(101) are enriched for direct effects  
1551 on lifespan.

1552  
1553 The strengths of our study undoubtedly include its size with over one million lifespans being  
1554 considered and the partition into independent discovery and replication, albeit mitigated by the  
1555 power-reducing effects of using (two) parents rather than genotyped subjects. Meta-analysing  
1556 under two contrasting assumptions of sexual dimorphism, also avoided the loss of power  
1557 associated with making the wrong assumption for a locus. However, despite its size, definitive  
1558 identification of ageing pathways beyond disease remains elusive in humans. In addition, our  
1559 replication was not sufficiently powered to allow for a multiple testing adjustment across  
1560 discovered alleles, the risk of some false positives is thus increased, albeit mitigated by the  
1561 consistency with other lines of evidence, for example strong and previously well-known  
1562 disease susceptibilities at many of the loci.

1563  
1564 We also show how disease informed lifespan GWAS (iGWAS) scan can improve statistical  
1565 power and identification of novel loci. Its main limitation is the inability to discover any new  
1566 mechanisms that are not acting through disease predisposition. Interestingly, the observed  
1567 lifespan-modulating effects of the discovered SNPs and the expected effects based on their  
1568 known disease associations are still quite far apart, indicating that there are many heritable  
1569 life-shortening conditions have not yet (sufficiently) studied by GWAS.

1570  
1571 Our observation, that despite a larger dataset, we consider our study only moderately  
1572 powered, whereas Pilling et al (6) stated “indeed the power (>99% to detect an allele of 1%  
1573 minor allele frequency accounting for 0.1% of phenotype variance) is sufficient to suggest that  
1574 we have identified all moderate to larger effect common genotyped or imputed variants in our  
1575 studied population” can perhaps be reconciled by recognising the phenotype to which Pilling  
1576 et al’s statement related: Martingale residuals of parent survival, not subject lifespan. Variance  
1577 explained by an allele for the former will be several times less than for the latter (more  
1578 pertinent) trait, due to the mitigating effects of parent imputation and the proportion still alive.

1579 SI Figures

1580

1581 **Fig. S1: Concordance between inferred effect sizes from Pilling 2017 and our estimated**  
 1582 **effect sizes in a largely overlapping UK Biobank sample**

1583

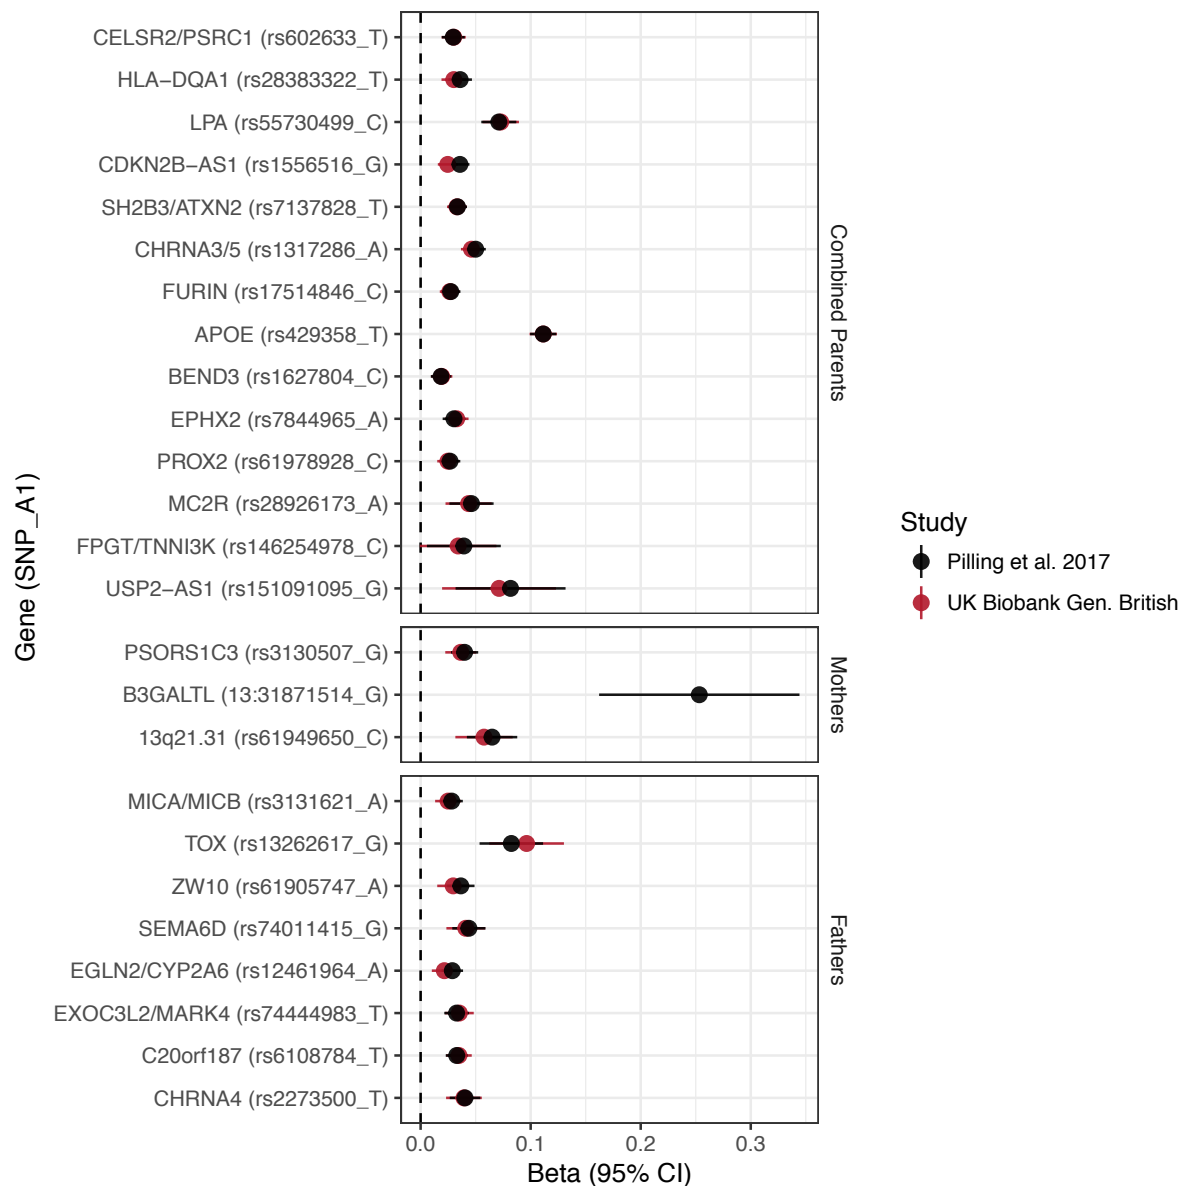

1584

1585

1586 *Effect estimates from Pilling et al.(6) were converted to  $\log_e(\text{protection ratio})$  based solely on the*  
 1587 *proportion dead in individual parental samples, or (for combined parents results) based on an*  
 1588 *empirical conversion factor from APOE (see Methods). By definition, the inferred effect estimate for*  
 1589 *APOE in combined parents is identical between the studies; all other estimates provide a measure of*  
 1590 *concordance between inferred and calculated effects for each locus. Gene names are as reported by*  
 1591 *discovery. Note, rs161091095 near USP2-AS1 is a proxy ( $r^2 = 1.00$ ) for rs139137459, the SNP reported*  
 1592 *by Pilling et al. No proxies could be found for 13:31871514\_T\_G. Gene – Nearby gene(s) as reported*  
 1593 *by discovery. SNP – rsID of SNP or proxy. A1 – Longevity allele. Beta - the estimated  $\log_e(\text{protection}$*   
 1594 *ratio) for one copy of the effect allele. CI – Confidence Interval*

1595 **Fig. S2: Loci with significantly predicted candidate genes using SMR-HEIDI test and the**  
 1596 **CAGE eQTL dataset (blood tissue)**  
 1597

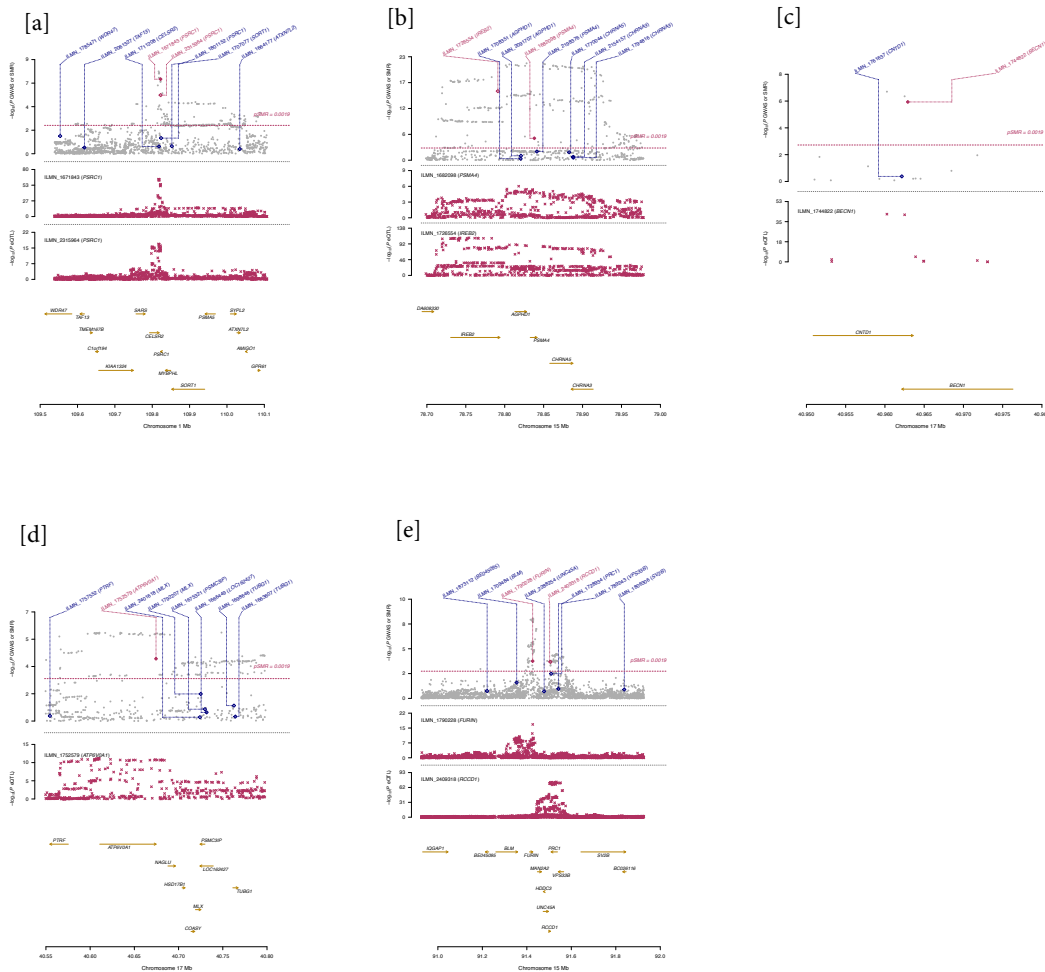

1598 *Lifespan GWAS and eQTL signals are plotted and compared. Gene expression probe names are*  
 1599 *provided with the corresponding gene names in brackets. The pSMR threshold corresponds to a*  
 1600 *significance level of FDR < 5%, and the gene expression probes that have SMR signal passing this*  
 1601 *threshold are displayed as red diamonds, otherwise blue. Filled diamonds indicate that the*  
 1602 *corresponding probes also pass the  $p > 0.05$  threshold for the HEIDI test, i.e. the expressions of the*  
 1603 *particular genes possibly share causal variants with the lifespan GWAS signals. Panels are genomic*  
 1604 *loci around a) CELSR2/PSRC1; b) CHRNA3/5; c) BECN1; d) ARPC1; e) FURIN/FES*  
 1605  
 1606

1607 **Fig. S3: Loci with significantly predicted candidate genes using SMR-HEIDI test and the**  
 1608 **Westra eQTL dataset (blood tissue)**  
 1609

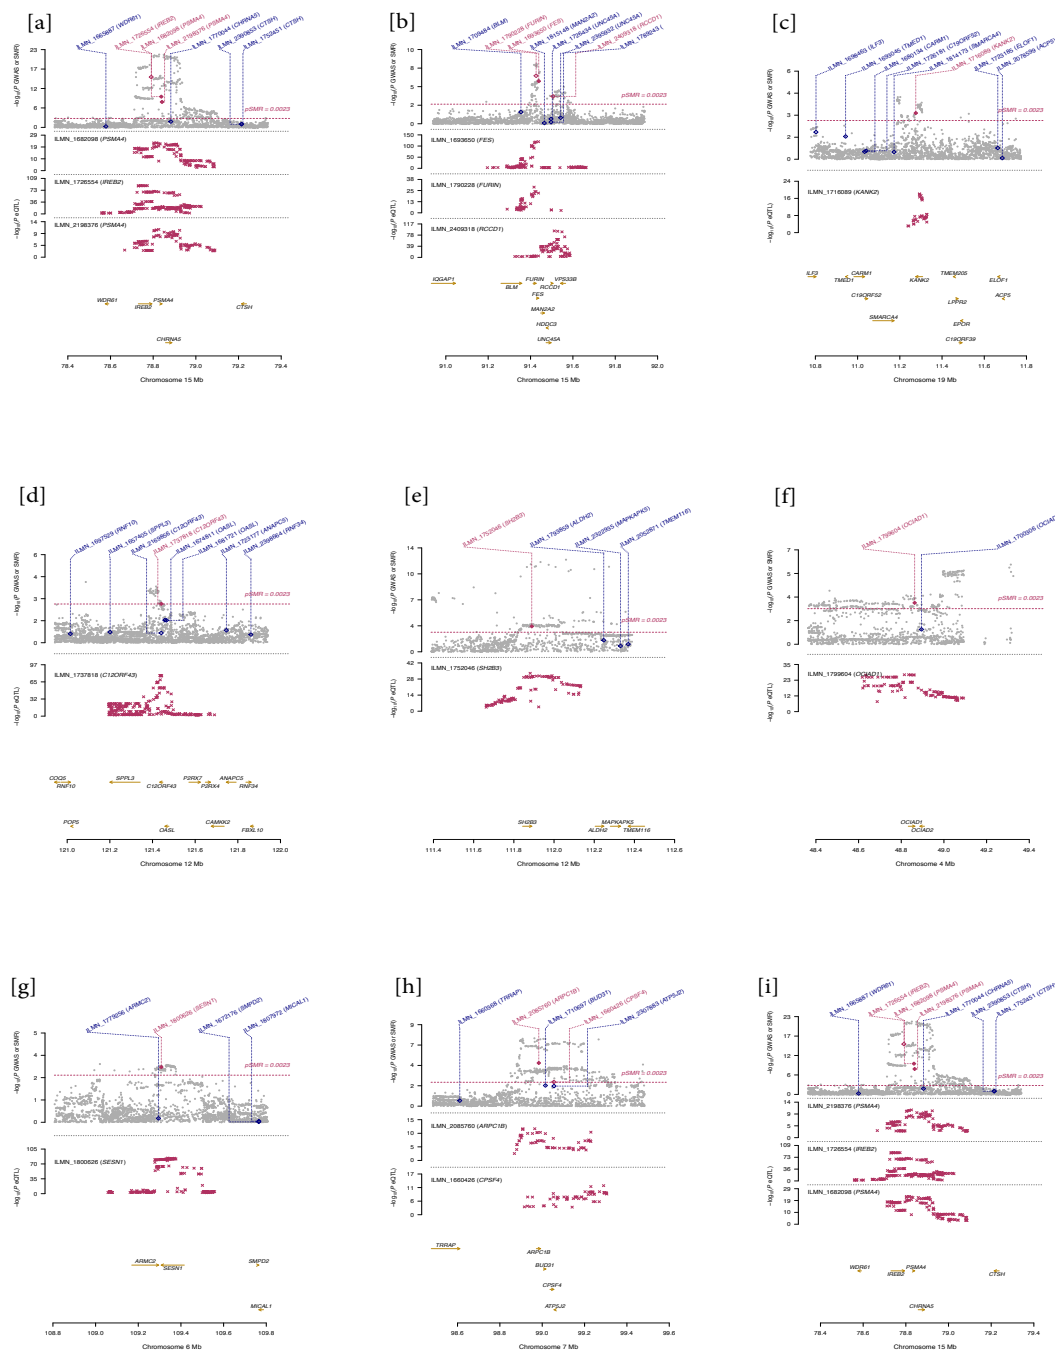

1610  
 1611  
 1612 *Lifespan GWAS and eQTL signals are plotted and compared. Gene expression probe names are*  
 1613 *provided with the corresponding gene names in brackets. The pSMR threshold corresponds to a*  
 1614 *significance level of FDR < 5%, and the gene expression probes that have SMR signal passing this*  
 1615 *threshold are displayed as red diamonds, otherwise blue. Filled diamonds indicate that the*  
 1616 *corresponding probes also pass the  $p > 0.05$  threshold for the HEIDI test, i.e. the expressions of the*  
 1617 *particular genes possibly share causal variants with the lifespan GWAS signals. Panels are genomic*  
 1618 *loci around a) CHRNA3/5; b) FURIN/FES; c) KANK2; d) C12Orf43; e) ATXN2/BRAP; g) FOXO3; h)*  
 1619 *ARPC1; i) CHRNA3/5*

1620 **Fig. S4: eQTL SNPs associated with lifespan for genes whose expression varies with**  
1621 **age**  
1622

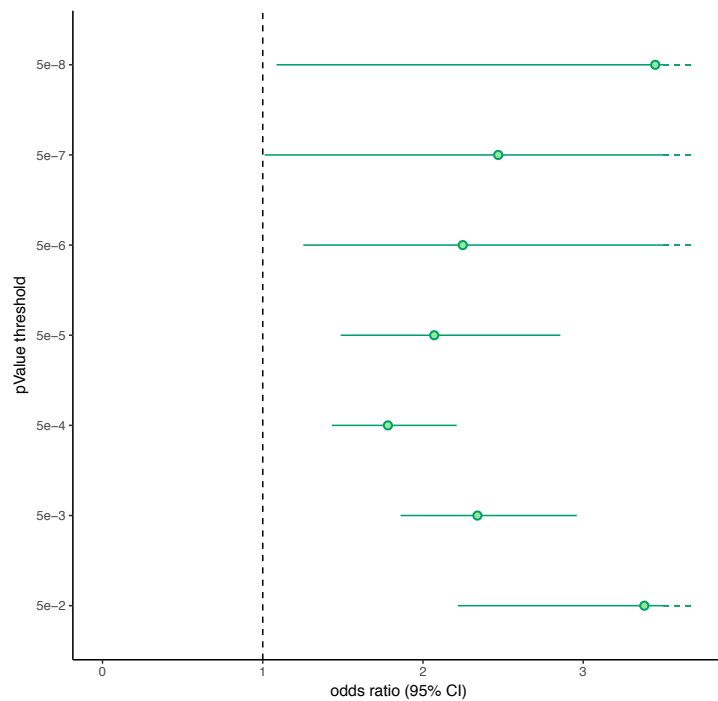

1623  
1624

1625 *We identified SNPs in our CES GWAS (discovery and replication combined) that were also eQTLs i.e.*  
1626 *associated with the expression of at least one gene with  $P < 10^{-5}$  in a dataset provided to us by the*  
1627 *eQTLGen Consortium. A total of 2,967 eQTLs after distance pruning (500 kb) were present, of which*  
1628 *500 were associated with genes differentially expressed with age(101). We used Fisher's exact test to*  
1629 *determine, amongst the set of eQTLs, if SNPs which were associated with lifespan (at varying thresholds*  
1630 *of statistical significance) were enriched for SNPs associated with genes whose expression is age-*  
1631 *related. Odds ratio and 95% confidence intervals from Fisher's exact test are represented for different*  
1632 *thresholds of statistical significance. Upper bounds of confidence interval higher than 3.5 are*  
1633 *represented by a dotted line (respectively 10.46, 5.68 and 5.37 for significance thresholds of 5e-8, 5e-*  
1634 *7 and 5e-2). We see a significant enrichment ( $P < 0.05$ ) in age-related eQTLs for all thresholds pointing*  
1635 *out that age-related eQTLs, modulating the expression of genes differentially expressed with age, are*  
1636 *enriched for lower than expected P value in our lifespan GWAS.*  
1637

1638 **Fig. S5: Sex and age specific effects of polygenic survival score (PRS) on parental**  
 1639 **lifespan of Scottish and English/Welsh subsamples of UK Biobank**  
 1640

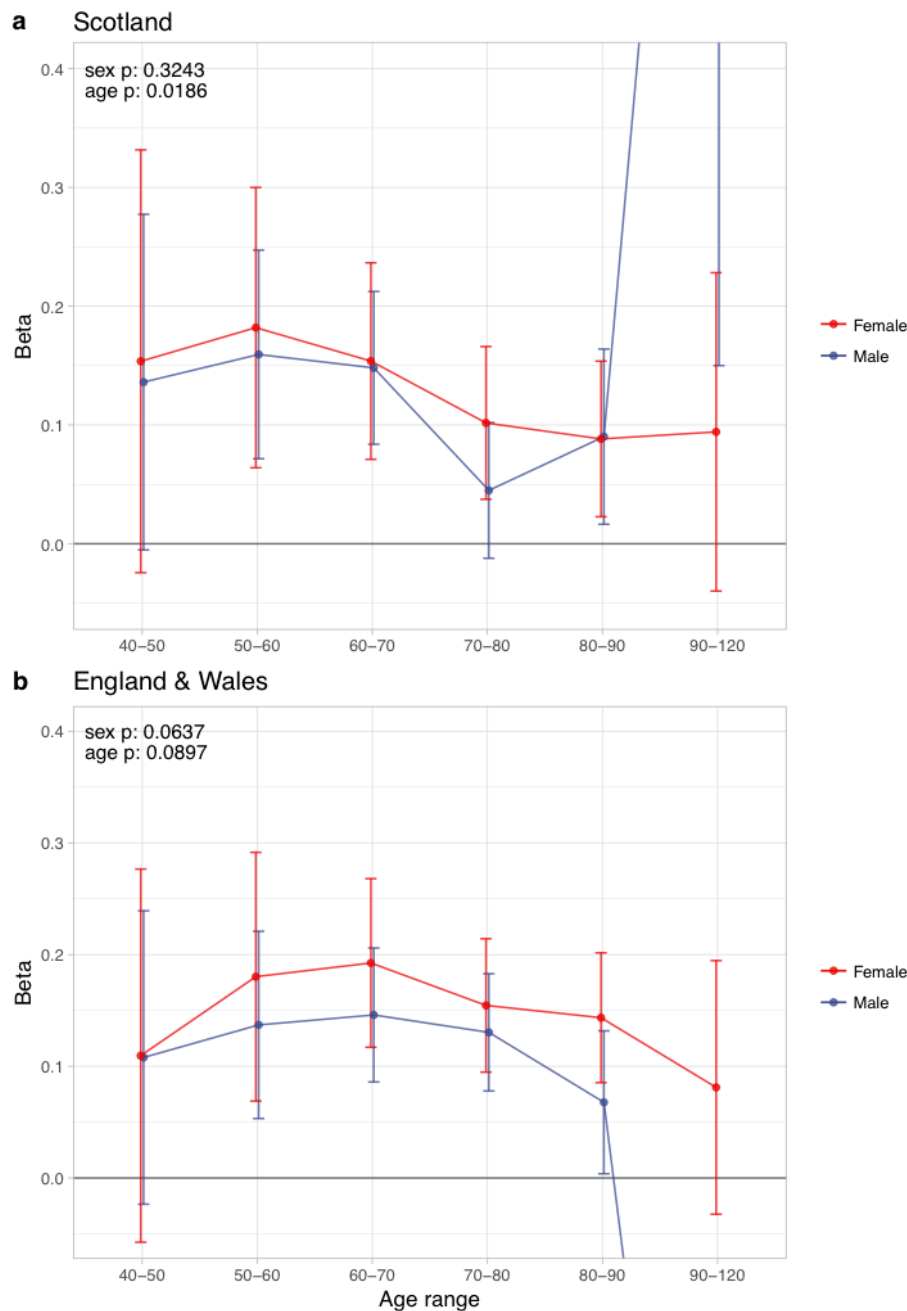

1641 *a) Out of sample Scottish subset of UK Biobank; b) Out of sample English and Welsh subset of UK*  
 1642 *Biobank; Estimates for the PRS on father lifespan in the highest age range have very wide confidence*  
 1643 *intervals (CI) due to the limited number of fathers surviving past 90 years of age. The beta 95% CI for*  
 1644 *these estimates are 0.15 to 2.20 for Scottish subsamples and -1.34 to -0.16 for English & Welsh*  
 1645 *subsamples. Beta – log.(protection ratio) for 1 standard deviation of PRS for increased lifespan in self*  
 1646 *in the age band (i.e. 2 x observed due to 50% kinship), bounds shown are 95% CI; Age range – the*  
 1647 *range of ages over which beta was estimated; sex p – P value for association of effect size with sex; age*  
 1648 *p – P value for association of effect size with age*  
 1649

1650 **Fig. S6: Survival Curves for highest and lowest deciles of lifespan polygenic risk score**  
 1651 **in UK Biobank subjects.**  
 1652

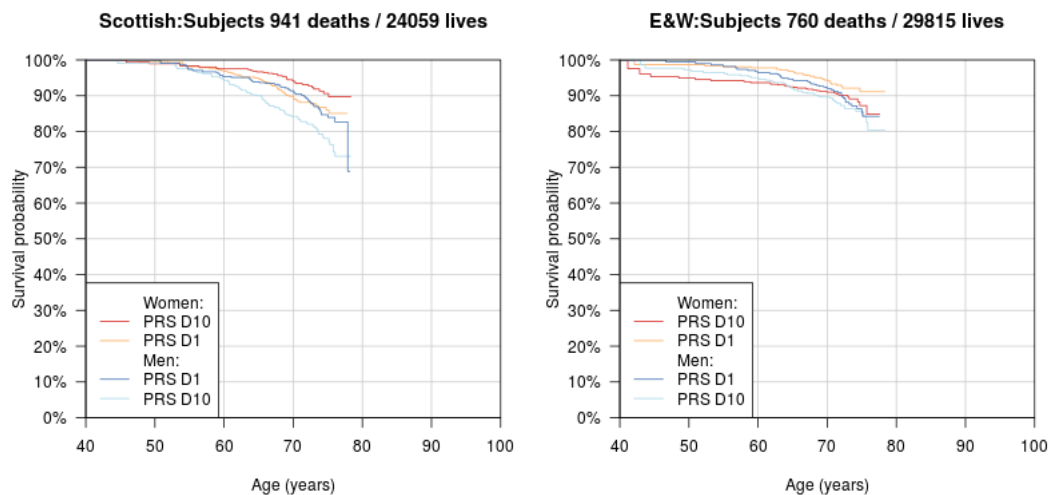

1653  
 1654 *A polygenic risk score was made for each subject using GWAS results that did not include the subject*  
 1655 *sets under consideration. Subject survival information (age entry, age exit, age of death (if applicable))*  
 1656 *was used to create Kaplan-Meier curves for the top and bottom decile of score. The narrow range of*  
 1657 *ages and short time since inception means that UK Biobank subject curves are subject to greater*  
 1658 *uncertainty, particularly at each end, and only cover a shorter interval. E&W – England and Wales;*  
 1659 *PRS – polygenic risk score.*

1660  
 1661 **Fig. S7: Associations between polygenic lifespan score and diseases of UK Biobank**  
 1662 **subjects and their kin.**

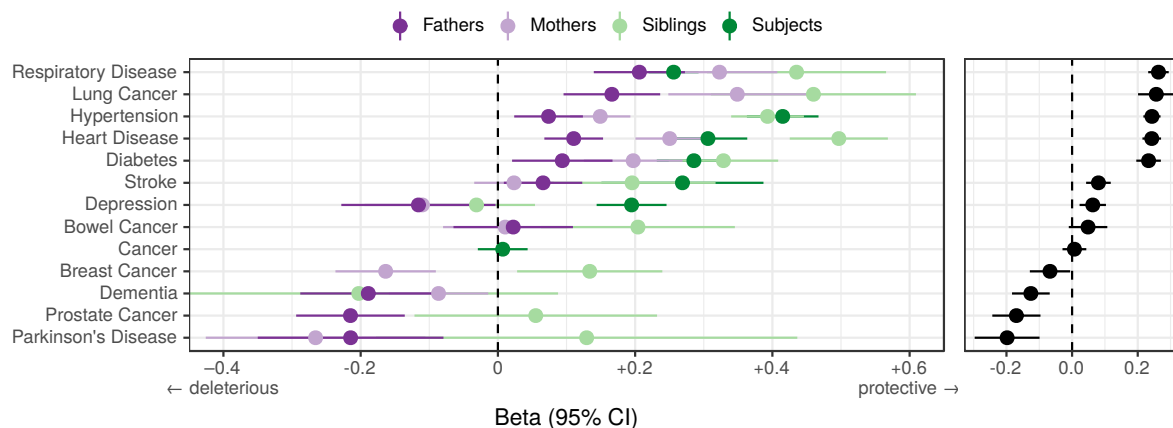

1663  
 1664 *Logistic regression was performed on standardised polygenic survival score (all variants) and 21*  
 1665 *disease traits reported by 24,059 Scottish and 29,815 English/Welsh out-of-sample individuals about*  
 1666 *themselves and their kin. Displayed here are inverse-variance meta-analysed estimates of the diseases*  
 1667 *for which multiple sources of data were available (i.e. parents and/or siblings; see Fig. S8 for all*  
 1668 *associations). “Cancer” is only in subjects, whilst the specific subtypes are analysed for kin. The left*  
 1669 *panel shows disease estimates for each kin separately; the right panel shows the combined estimate,*  
 1670 *with standard errors adjusted for correlation between family members. Diseases have been ordered by*  
 1671 *magnitude of effect size (combined estimate). Beta – log odds reduction ratio of disease per standard*  
 1672 *deviation of polygenic survival score, where a negative beta indicates a deleterious effect of score on*  
 1673 *disease prevalence (lifetime so far), and positive beta indicates a protective effect on disease. Effect*  
 1674 *sizes for first degree relative have been doubled. Cancer – Binary cancer phenotype (any cancer, yes /*  
 1675 *no).*  
 1676

1677 **Fig. S8: Associations between polygenic survival score and diseases of individuals and**  
 1678 **their kin from Scottish and English/Welsh subsamples of UK Biobank.**  
 1679

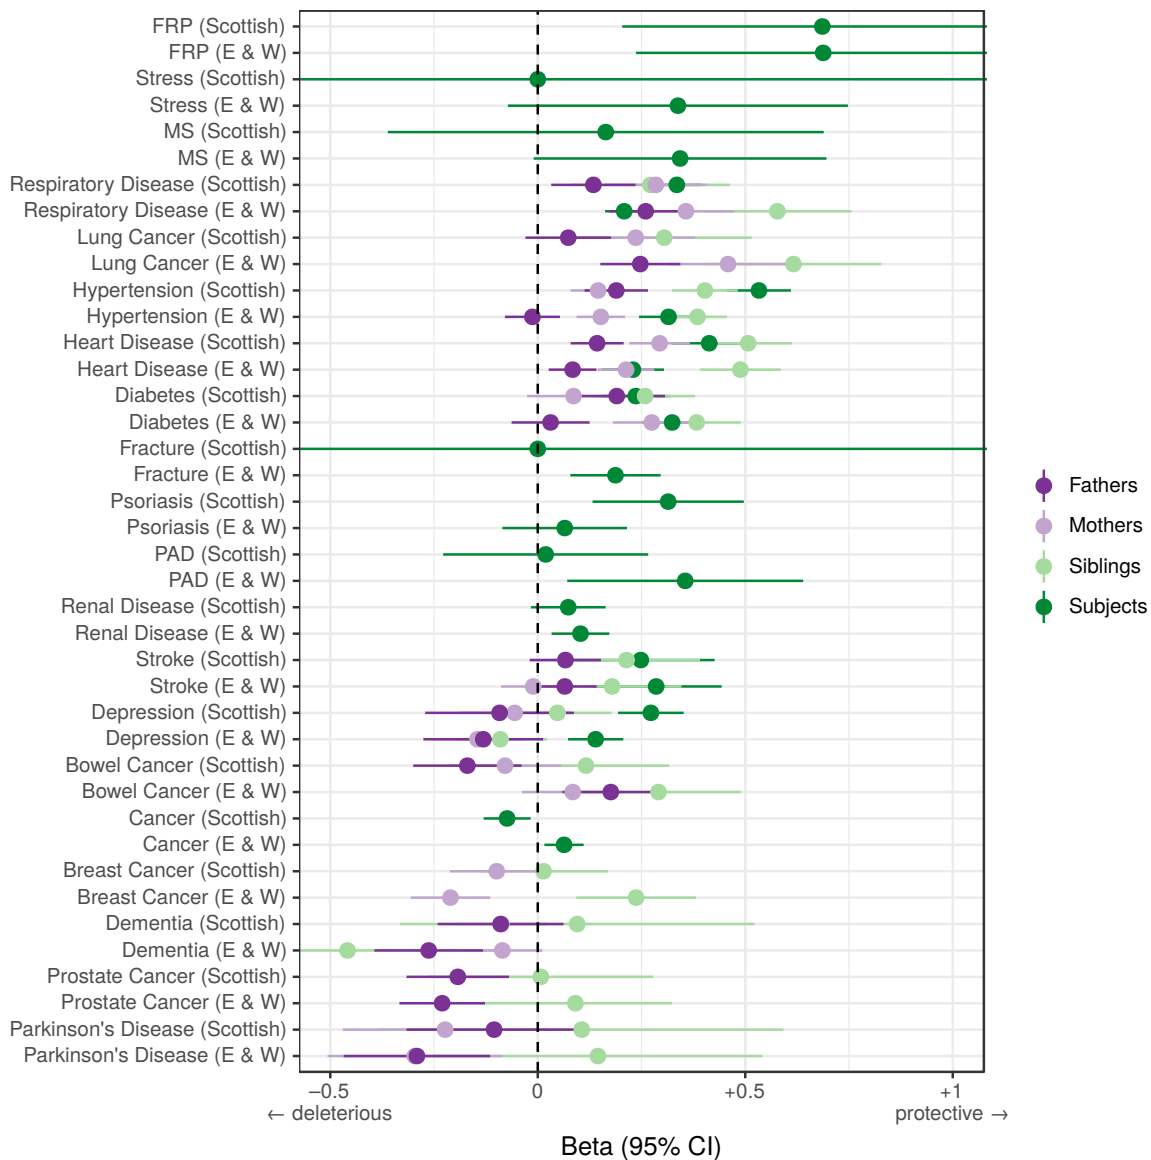

1680  
 1681 *Logistic regression was performed on standardised polygenic survival score (all variants) and 21 traits*  
 1682 *reported by 24,059 Scottish and 29,815 English/Welsh out-of-sample individuals about themselves and*  
 1683 *their kin. Diseases have been ordered by magnitude of effect size (meta-analysed between cohorts and*  
 1684 *kin). Beta – log odds reduction ratio of disease per standard deviation of polygenic survival score,*  
 1685 *where a negative beta indicates a deleterious effect of score on disease prevalence (lifetime so far), and*  
 1686 *positive beta indicates a protective effect on disease. Effect sizes for first degree relative have been*  
 1687 *doubled. Cancer – Binary cancer phenotype (yes / no), FRP – Female Reproductive Problems, MS –*  
 1688 *Multiple Sclerosis, PAD – Peripheral Artery Disease.*



1689 **Fig. S9: Heat map of the effect of 19 SNPs significant at 5e-8 on the risk factors in the**  
 1690 **iGWAS.**  
 1691

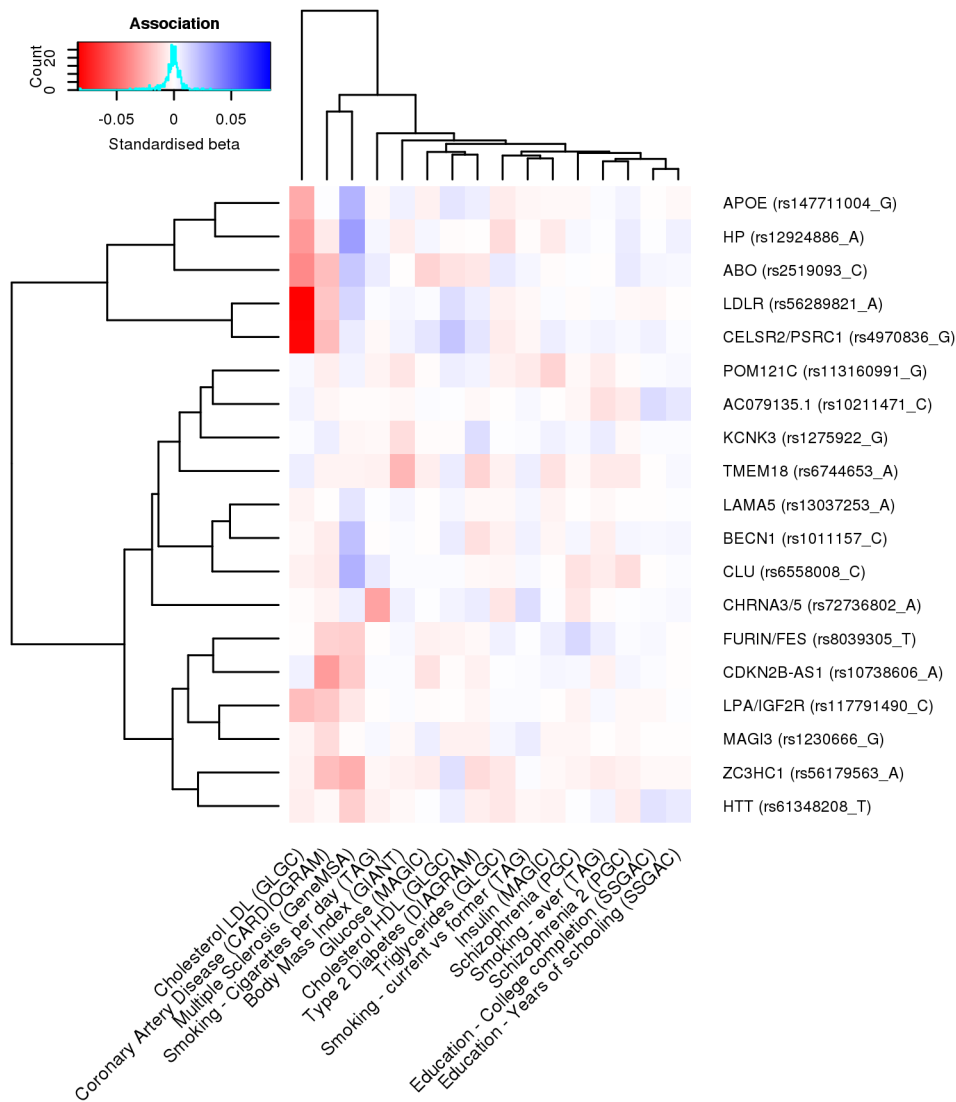

1692  
 1693 *We looked up the effects of lifespan protecting alleles identified by iGWAS in the consortium GWAMA*  
 1694 *for all risk factors significantly associated with lifespan in univariate analysis (for studies tested see*  
 1695 *Methods). We kept all traits univariately associated with lifespan to allow for the presence of potentially*  
 1696 *correlated traits, not significant in the multivariate analysis. In the iGWAS analysis, Z-scores*  
 1697 *(estimated effect divided by standard error) are used, but for comparison purposes, standardised betas*  
 1698 *(Z-score divided by square root of the sample size) were calculated for each risk factor at every SNP*  
 1699 *and represented in this figure. Both SNPs and traits were clustered for similarity. For example, we can*  
 1700 *see that almost all iGWAS alleles identified as protective for lifespan are exhibiting negative*  
 1701 *standardized betas in the coronary artery disease (CAD) association study, confirming the hypothesis*  
 1702 *that CAD is negatively affecting lifespan. We can also notice that some SNPs are strongly associated*  
 1703 *with some risk factors (APOE and LDR with lipids traits or CDKN2B-AS1 with CAD) and likely*  
 1704 *influence lifespan through their effect on these traits. However, some other SNPs (KCNK3 and HTT for*  
 1705 *example) are showing moderate effects on several risk factors and are probably affecting lifespan*  
 1706 *through pleiotropic effects.*

1707 SI Tables

1708

1709 **Table S1: Descriptive statistics of the cohorts and lives analysed**

| Study       | Cohort      | Ancestry    | Parent  | Dead  | Count     | Age |       |     |
|-------------|-------------|-------------|---------|-------|-----------|-----|-------|-----|
|             |             |             |         |       |           | Max | Mean  | Min |
| UK Biobank  | Discovery   | Gen.British | Father  | FALSE | 74,320    | 103 | 77.97 | 60  |
| UK Biobank  | Discovery   | Gen.British | Father  | TRUE  | 237,940   | 106 | 71.51 | 40  |
| UK Biobank  | Discovery   | Gen.British | Mother  | FALSE | 129,357   | 105 | 78.60 | 60  |
| UK Biobank  | Discovery   | Gen.British | Mother  | TRUE  | 193,588   | 107 | 75.14 | 40  |
| UK Biobank  | Replication | British     | Father  | FALSE | 4,087     | 106 | 78.55 | 60  |
| UK Biobank  | Replication | British     | Father  | TRUE  | 12,035    | 102 | 71.64 | 40  |
| UK Biobank  | Replication | British     | Mother  | FALSE | 7,430     | 105 | 78.36 | 60  |
| UK Biobank  | Replication | British     | Mother  | TRUE  | 9,605     | 104 | 74.35 | 40  |
| UK Biobank  | Replication | Irish       | Father  | FALSE | 1,799     | 100 | 77.56 | 60  |
| UK Biobank  | Replication | Irish       | Father  | TRUE  | 7,955     | 101 | 71.20 | 40  |
| UK Biobank  | Replication | Irish       | Mother  | FALSE | 3,546     | 102 | 78.32 | 60  |
| UK Biobank  | Replication | Irish       | Mother  | TRUE  | 6,564     | 103 | 74.08 | 40  |
| UK Biobank  | Replication | European    | Father  | FALSE | 523       | 101 | 76.28 | 60  |
| UK Biobank  | Replication | European    | Father  | TRUE  | 1,073     | 103 | 70.29 | 40  |
| UK Biobank  | Replication | European    | Mother  | FALSE | 947       | 96  | 74.46 | 60  |
| UK Biobank  | Replication | European    | Mother  | TRUE  | 852       | 101 | 71.94 | 40  |
| LifeGen     | Replication | European    | Father  | FALSE | 83,298    | 117 | 57.48 | 41  |
| LifeGen     | Replication | European    | Father  | TRUE  | 77,163    | 109 | 71.06 | 41  |
| LifeGen     | Replication | European    | Mother  | FALSE | 97,794    | 117 | 59.55 | 41  |
| LifeGen     | Replication | European    | Mother  | TRUE  | 62,364    | 108 | 75.27 | 41  |
| Total       | D+R         | European    | Father  | FALSE | 164,027   | 117 | 67.57 | 41  |
| Total       | D+R         | European    | Father  | TRUE  | 336,166   | 109 | 71.40 | 40  |
| Total       | D+R         | European    | Mother  | FALSE | 239,074   | 117 | 70.78 | 41  |
| Total       | D+R         | European    | Mother  | TRUE  | 272,973   | 108 | 75.10 | 40  |
| Grand Total | D+R         | European    | Parents | ALL   | 1,012,240 | 117 | 71.63 | 40  |

1710

1711 *Summary statistics for the 1,012,240 parental lifespans passing phenotypic QC (most notably, parent*  
 1712 *age > 40). In practice, fewer lives than these were analysed for some SNPs, as a SNP may not have*  
 1713 *passed QC in all cohorts (in particular LifeGen MAF > 1%). Ancestries in UK Biobank are self-*  
 1714 *declared, except in the case of Gen. British. Gen. British – Participants identified as genomically British*  
 1715 *by UK Biobank, based on their genomic profile. D+R - Discovery and replication cohorts combined.*  
 1716 *LifeGen – A consortium of 26 population cohorts of European Ancestry, with UK Biobank lives removed*

1717 **Table S2: Fourteen regions associate with lifespan at genome-wide significance in**  
 1718 **discovery and seven nominally replicate ( $P < 0.05$ ) in a European population sample**  
 1719

| rsID               | At or near        | Chr       | Position         | A1       | Freq1        | Discovery     |               |                |                |                | Replication   |               |               |                |                |
|--------------------|-------------------|-----------|------------------|----------|--------------|---------------|---------------|----------------|----------------|----------------|---------------|---------------|---------------|----------------|----------------|
|                    |                   |           |                  |          |              | Beta1         | SE            | Years          | CES P          | PDES P         | Beta1         | SE            | Years         | CES P          | PDES P         |
| rs7528419          | CELSR2/PSRC1      | 1         | 109817192        | G        | 0.222        | 0.0314        | 0.0055        | 0.31441        | 1.4E-08        | 2.6E-08        | 0.0012        | 0.0840        | 0.0121        | 0.4426         | 0.0565         |
| <b>rs34967069</b>  | <b>HLA-DQA1</b>   | <b>6</b>  | <b>32591248</b>  | <b>T</b> | <b>0.053</b> | <b>0.0577</b> | <b>0.0117</b> | <b>0.57693</b> | <b>7.5E-07</b> | <b>3.3E-08</b> | <b>0.0529</b> | <b>0.1669</b> | <b>0.5293</b> | <b>0.0008</b>  | <b>0.0087</b>  |
| <b>rs118039278</b> | <b>LPA</b>        | <b>6</b>  | <b>160985526</b> | <b>G</b> | <b>0.919</b> | <b>0.0737</b> | <b>0.0085</b> | <b>0.73662</b> | <b>4.0E-18</b> | <b>3.7E-18</b> | <b>0.0857</b> | <b>0.1548</b> | <b>0.8566</b> | <b>1.6E-08</b> | <b>1.3E-07</b> |
| rs10225529         | ARPC1             | 7         | 98963155         | C        | 0.104        | 0.0419        | 0.0076        | 0.41888        | 3.2E-08        | 2.4E-07        | -0.0048       | 0.1141        | -0.0481       | 0.3368         | 0.6272         |
| rs7844965          | CLU               | 8         | 27442064         | A        | 0.232        | 0.0328        | 0.0055        | 0.32802        | 2.2E-09        | 4.4E-09        | 0.0057        | 0.0840        | 0.0569        | 0.7510         | 0.3500         |
| <b>rs1556516</b>   | <b>CDKN2B-AS1</b> | <b>9</b>  | <b>22100176</b>  | <b>G</b> | <b>0.503</b> | <b>0.0246</b> | <b>0.0046</b> | <b>0.24638</b> | <b>9.1E-08</b> | <b>8.0E-10</b> | <b>0.0262</b> | <b>0.0703</b> | <b>0.2617</b> | <b>9.9E-05</b> | <b>0.0014</b>  |
| rs10908903         | GADD45G           | 9         | 92228559         | T        | 0.532        | 0.0256        | 0.0047        | 0.2564         | 3.7E-08        | 1.3E-06        | 0.0065        | 0.0710        | 0.0653        | 0.1790         | 0.5779         |
| <b>rs11065979</b>  | <b>ATXN2/BRAP</b> | <b>12</b> | <b>112059557</b> | <b>C</b> | <b>0.563</b> | <b>0.0338</b> | <b>0.0047</b> | <b>0.33797</b> | <b>3.9E-13</b> | <b>1.8E-13</b> | <b>0.0137</b> | <b>0.0731</b> | <b>0.1366</b> | <b>0.0307</b>  | <b>0.1652</b>  |
| rs143498116        | 13q21.33          | 13        | 71286100         | A        | 0.994        | 0.1052        | 0.0320        | 1.05173        | 0.0010         | 2.4E-08        | 0.1209        | 0.9451        | 1.2094        | 0.1004         | 0.4474         |
| <b>rs72738786</b>  | <b>CHRNA3/5</b>   | <b>15</b> | <b>78828086</b>  | <b>G</b> | <b>0.666</b> | <b>0.0474</b> | <b>0.0049</b> | <b>0.47408</b> | <b>3.0E-22</b> | <b>6.0E-26</b> | <b>0.0302</b> | <b>0.0747</b> | <b>0.3021</b> | <b>2.6E-05</b> | <b>0.0001</b>  |
| <b>rs7177338</b>   | <b>FURIN/FES</b>  | <b>15</b> | <b>91428636</b>  | <b>A</b> | <b>0.525</b> | <b>0.0266</b> | <b>0.0046</b> | <b>0.2658</b>  | <b>9.1E-09</b> | <b>6.9E-08</b> | <b>0.0204</b> | <b>0.0724</b> | <b>0.2040</b> | <b>0.0024</b>  | <b>0.0247</b>  |
| <b>rs429358</b>    | <b>APOE</b>       | <b>19</b> | <b>45411941</b>  | <b>T</b> | <b>0.844</b> | <b>0.1114</b> | <b>0.0063</b> | <b>1.11421</b> | <b>9.4E-69</b> | <b>8.8E-71</b> | <b>0.0890</b> | <b>0.1074</b> | <b>0.8897</b> | <b>5.9E-17</b> | <b>5.5E-16</b> |
| rs6108784          | C20orf187         | 20        | 10964366         | T        | 0.585        | 0.0185        | 0.0047        | 0.18466        | 8.5E-05        | 3.3E-08        | 0.0086        | 0.0727        | 0.0857        | 0.1193         | 0.4176         |
| rs6011779          | CHRNA4            | 20        | 61984317         | T        | 0.81         | 0.0328        | 0.0059        | 0.32835        | 2.3E-08        | 6.2E-07        | -0.0044       | 0.0999        | -0.0438       | 0.3307         | 0.8935         |

1720 *At or near – Gene, cluster of genes, or cytogenetic band in close proximity to lead SNP; Chr –*  
 1721 *Chromosome, Position – Base-pair position on chromosome (build GRCh37); A1 – the effect allele,*  
 1722 *increasing lifespan; Freq1- Frequency of the A1 allele in the discovery population; Years – Years of*  
 1723 *lifespan gained for carrying one copy of the A1 allele; Beta1 – the  $\log_e(\text{protection ratio})$  for carrying*  
 1724 *one copy of A1 under additive dosage model which multiplied observed offspring genotype on parent*  
 1725 *effect by 2; SE – Standard Error; CES – Common effect size assumption of A1 across sexes; PDES –*  
 1726 *Potentially different effect size assumption of A1 across sexes; P – P value for the Wald test of*  
 1727 *association between imputed dosage and Cox model residual (replication P values are one sided for*  
 1728 *CES and direction agnostic for PDES). Loci reaching nominal significance ( $P < 0.05$ ) in the replication*  
 1729 *cohort are bolded. Non-significant replication P values are greyed out.*  
 1730  
 1731

1732 **Table S3: Five candidate lifespan regions replicate nominally ( $P < 0.05$ ) in our**  
 1733 **discovery+replication meta-analysis sample or European population sample.**  
 1734

| rsID            | At or near    | Chr | Position  | A1 | Freq1 | Sex    | Discovery |        |        |         | Study                   | Replication |        |         |         | Sample |
|-----------------|---------------|-----|-----------|----|-------|--------|-----------|--------|--------|---------|-------------------------|-------------|--------|---------|---------|--------|
|                 |               |     |           |    |       |        | Beta1     | SE     | Years  | P       |                         | Beta1       | SE     | Years   | P       |        |
| rs3800231       | FOXO3A        | 6   | 108998266 | A  | 0.285 | Both   | 0.0499    | 0.0223 | 0.4989 | 0.0250  | Flachsbar et al. 2009   | 0.0174      | 0.0043 | 0.1745  | 2.2E-05 | a      |
| rs2149954       | 5q33.3/EBF1   | 5   | 157820602 | T  | 0.359 | Both   | 0.0249    | 0.0044 | 0.2494 | 1.7E-08 | Deelen et al. 2014      | 0.0085      | 0.0040 | 0.0853  | 0.0167  | a      |
| rs2069837       | IL6           | 7   | 22768027  | A  | 0.067 | Both   | 0.0716    | 0.0119 | 0.7160 | 1.8E-09 | Zeng et al. 2016        | -0.0074     | 0.0076 | -0.0743 | 0.8362  | a      |
| rs113946246     | ANKRD20A9P    | 13  | 19429318  | T  | 0.822 | Both   | 0.0735    | 0.0134 | 0.7351 | 3.7E-08 | Zeng et al. 2016        | 0.0008      | 0.0055 | 0.0078  | 0.4440  | a      |
| rs6873545       | d3-GHR        | 5   | 42631264  | C  | 0.269 | Male   | 0.1553    | 0.0603 | 1.5533 | 0.0100  | Ben-Avraham et al. 2017 | -0.0008     | 0.0056 | -0.0084 | 0.5597  | a      |
| rs3764814       | USP42         | 7   | 6189780   | C  | 0.929 | Both   | 0.0565    | 0.0072 | 0.5650 | 5.0E-15 | Sebastiani et al. 2017  | 0.0046      | 0.0075 | 0.0463  | 0.2681  | a      |
| rs7976168       | TMTC2         | 12  | 83438559  | A  | 0.667 | Both   | 0.0282    | 0.0048 | 0.2820 | 4.0E-09 | Sebastiani et al. 2017  | 0.0049      | 0.0041 | 0.0494  | 0.1140  | a      |
| rs146254978     | FPGT/TNNI3K   | 1   | 74867799  | C  | 0.059 | Both   | 0.0393    | 0.0171 | 0.3929 | 0.0210  | Pilling et al. 2017     | 0.0051      | 0.0555 | 0.0507  | 0.4636  | b      |
| rs1627804       | BEND3         | 6   | 107400428 | C  | 0.666 | Both   | 0.0185    | 0.0047 | 0.1854 | 1.1E-04 | Pilling et al. 2017     | 0.0092      | 0.0085 | 0.0921  | 0.1382  | b      |
| rs151091095     | USP2-AS1      | 11  | 119289932 | G  | 0.013 | Both   | 0.0817    | 0.0255 | 0.8172 | 0.0013  | Pilling et al. 2017     | 0.1265      | 0.1004 | 1.2652  | 0.1038  | b      |
| rs61978928      | PROX2         | 14  | 75321714  | C  | 0.323 | Both   | 0.0267    | 0.0048 | 0.2673 | 2.0E-08 | Pilling et al. 2017     | -0.0051     | 0.0085 | -0.0509 | 0.7258  | b      |
| rs28926173      | MC2R          | 18  | 13886719  | A  | 0.050 | Both   | 0.0462    | 0.0103 | 0.4622 | 6.4E-06 | Pilling et al. 2017     | 0.0376      | 0.0231 | 0.3761  | 0.0521  | b      |
| rs3131621       | MICA/MICB     | 6   | 31425499  | A  | 0.682 | Male   | 0.0283    | 0.0051 | 0.2828 | 3.6E-08 | Pilling et al. 2017     | 0.0203      | 0.0154 | 0.2032  | 0.0930  | b      |
| rs13262617      | TOX           | 8   | 59838133  | G  | 0.035 | Male   | 0.0824    | 0.0147 | 0.8242 | 3.1E-08 | Pilling et al. 2017     | 0.0230      | 0.0303 | 0.2305  | 0.2233  | b      |
| rs61905747      | ZW10          | 11  | 113639842 | A  | 0.806 | Male   | 0.0365    | 0.0063 | 0.3654 | 5.5E-09 | Pilling et al. 2017     | 0.0298      | 0.0139 | 0.2977  | 0.0161  | b      |
| rs74011415      | SEMA6D        | 15  | 47660194  | G  | 0.853 | Male   | 0.0439    | 0.0077 | 0.4385 | 1.4E-08 | Pilling et al. 2017     | 0.0105      | 0.0167 | 0.1049  | 0.2646  | b      |
| rs12461964      | EGLN2/CYP2A6  | 19  | 41341229  | A  | 0.504 | Male   | 0.0288    | 0.0050 | 0.2879 | 8.2E-09 | Pilling et al. 2017     | 0.0041      | 0.0139 | 0.0408  | 0.3844  | b      |
| rs74444983      | EXOC3L2/MARK4 | 19  | 45745607  | T  | 0.735 | Male   | 0.0327    | 0.0057 | 0.3265 | 9.1E-09 | Pilling et al. 2017     | 0.0164      | 0.0130 | 0.1638  | 0.1032  | b      |
| rs3130507       | PSORS1C3      | 6   | 31147476  | G  | 0.750 | Female | 0.0400    | 0.0063 | 0.3998 | 2.1E-10 | Pilling et al. 2017     | 0.0292      | 0.0175 | 0.2919  | 0.0480  | b      |
| 13:31871514_T_G | B3GALT1       | 13  | 31871514  | G  | 0.005 | Female | 0.2532    | 0.0464 | 2.5324 | 4.7E-08 | Pilling et al. 2017     | NA          | NA     | NA      | NA      | b      |
| rs61949650      | 13q21.31      | 13  | 64836488  | C  | 0.066 | Female | 0.0649    | 0.0117 | 0.6492 | 2.9E-08 | Pilling et al. 2017     | 0.0404      | 0.0239 | 0.4037  | 0.0455  | b      |

1735  
 1736  
 1737 *At or near – Gene, cluster of genes, or cytogenetic band in close proximity to lead SNP; Chr –*  
 1738 *Chromosome, Position – Base-pair position on chromosome (build GRCh37); A1 – the effect allele,*  
 1739 *increasing lifespan in discovery; Freq1- Frequency of the A1 allele in the replication sample, or if*  
 1740 *missing, the discovery sample; Sex – sex of the individuals or their parents used in the discovery and*  
 1741 *replication; Beta1 – the log(protection ratio) for carrying one copy of A1 under additive dosage model,*  
 1742 *inferred for discovery (see Methods); SE – Standard Error, calculated from reported P value and*  
 1743 *inferred effect estimates for discovery, assuming a two-sided test; Years – Years of lifespan gained for*  
 1744 *carrying one copy of the A1 allele; P – P value reported by original study for discovery, one-sided P*  
 1745 *value for the Wald test association between imputed dosage and cox model residual for the replication.*  
 1746 *For discovery, except Pilling et al's (6) SNPs, where we re-calculated effects directly from individual*  
 1747 *UKBB data ourselves, effects sizes have been converted to a common scale to enable comparison. Ref-*  
 1748 *reference ID of original study that identified the candidate SNP; Sample – independent sample used to*  
 1749 *replicate the results (a = UK Biobank Discovery+Replication Meta-analysis, b = LifeGen excluding*  
 1750 *UK Biobank). Loci showing nominal replication ( $P < 0.05$ ) are bolded. Note, rs151091095 near USP2-*  
 1751 *AS1 is a proxy ( $r^2 = 1.00$ ) for rs139137459, the SNP reported by Pilling et al; rs113946246 near*  
 1752 *ANKRD20A9P is a proxy ( $r^2 = 0.97$ ) for rs2440012, the SNP reported by Zeng et al; no proxies could*  
 1753 *be found for 13:31871514\_T\_G.*  
 1754  
 1755

1756 **Table S4: LD-score regression intercepts for GWAS results**  
 1757

| Cohort      | CES             | PDES            |
|-------------|-----------------|-----------------|
| Discovery   | 1.0351 (0.0049) | 1.0256 (0.0046) |
| Replication | 1.056 (0.0073)  | 1.0134 (0.0045) |
| Meta        | 1.0542 (0.0057) | 1.0307 (0.0049) |

1758  
 1759 *Regression intercepts (standard error) of the GWAS summary statistics as calculated by LD-score*  
 1760 *regression, using LD scores from on average 457,407 SNPs from the UK Biobank array. CES – Results*  
 1761 *under the assumption of common effect sizes across sexes, PDES – Results under the assumption of*  
 1762 *potentially different effect sizes across sexes..*

1763 **Table S5: Predicted candidate genes using SMR-HEIDI test and two blood eQTL**  
 1764 **datasets**  
 1765

| rsID        | Chr | Position  | At or near   | SMR Prioritized Genes | Westra   |          | CAGE     |          |
|-------------|-----|-----------|--------------|-----------------------|----------|----------|----------|----------|
|             |     |           |              |                       | P SMR    | P HEIDI  | P SMR    | P HEIDI  |
| rs7528419   | 1   | 109817192 | CELSR2/PSRC1 | PSRC1                 |          |          | 7.28E-08 | 2.98E-01 |
| rs10225529  | 7   | 98963155  | ARPC1        | ARPC1B                | 1.71E-05 | 2.97E-01 |          |          |
| rs11065979  | 12  | 112059557 | ATXN2/BRAP   | SH2B3                 | 3.76E-04 | 6.02E-02 |          |          |
| rs72738786  | 15  | 78828086  | CHRNA3/5     | PSMA4                 | 8.19E-10 | 2.24E-01 | 1.30E-05 | 1.08E-01 |
| rs7177338   | 15  | 91428636  | FURIN/FES    | FURIN/FES             | 3.06E-08 | 5.59E-01 |          |          |
| rs28971796  | 4   | 49151982  | CHW43        | OCIAD1                | 1.83E-06 | 5.50E-02 | 1.84E-04 | 6.21E-02 |
| rs1011157   | 17  | 40960253  | BECN1        | BECN1                 | 8.51E-04 | 1.99E-01 |          |          |
| rs142158911 | 19  | 11190534  | LDLR         | ATP6V0A1              |          |          | 1.16E-06 | 1.55E-01 |
| rs3800231   | 6   | 108998266 | FOXO3        | KANK2                 | 7.17E-04 | 5.66E-01 | 1.01E-04 | 9.47E-01 |
|             |     |           |              | SESN1                 | 8.17E-04 | 2.64E-01 |          |          |

1766  
 1767  
 1768 *All loci reaching genome-wide significance in discovery cohort GWAS, combined cohort GWAS, or*  
 1769 *iGWAS (Table 1), plus candidate loci d3-GHR, 5q33.3/EBF1, and FOXO3 were tested against eQTL*  
 1770 *data. Only genes that pass 5% false discovery rate threshold for the SMR test and  $P > 0.05$  threshold*  
 1771 *for HEIDI test are listed for their corresponding loci. Westra and CAGE refer to the two eQTL studies*  
 1772 *in the blood tissue. Corresponding probes also pass the  $P > 0.05$  threshold for the HEIDI test, i.e. the*  
 1773 *expressions of the particular genes possibly share causal variants with the lifespan GWAS signals. Chr*  
 1774 *– chromosome. At or near – nearby gene or cluster of genes to lead variant. SMR genes – genes*  
 1775 *prioritised by SMR within the given locus.*

1776 **Table S6: Significant associations of lifespan-protective variants (genome-wide**  
 1777 **significant in discovery or discovery+replication meta-analysis) and candidate variants**  
 1778 **with protection from 5 major disease categories in UK Biobank.**  
 1779

|                            | rsID        | Chr      | Position  | A1  | Cancer | CVD    | Diabetes | Neurological | Pulmonary | Total    | At or near   |
|----------------------------|-------------|----------|-----------|-----|--------|--------|----------|--------------|-----------|----------|--------------|
| Discovery                  | rs7528419   | 1        | 109817192 | G   |        | +++++  | -        |              |           | +6 -1    | CELSR2/PSRC1 |
|                            | rs34967069  | 6        | 32591248  | T   | +      |        |          |              | +         | +2 -0    | HLA-DQA1     |
|                            | rs118039278 | 6        | 160985526 | G   | -      | ++++   |          |              | -         | +5 -2    | LPA          |
|                            | rs10225529  | 7        | 98963155  | C   |        | +      |          |              |           | +1 -0    | ARPC1        |
|                            | rs7844965   | 8        | 27442064  | A   | +      |        |          | --           |           | +1 -2    | CLU          |
|                            | rs1556516   | 9        | 22100176  | G   | -      | +++++  | +        |              |           | +8 -1    | CDKN2B-AS1   |
|                            | rs10908903  | 9        | 92228559  | T   |        |        |          |              |           | +0 -0    | GADD45G      |
|                            | rs11065979  | 12       | 112059557 | C   | -      | +++++  | +        |              |           | +7 -1    | ATXN2/BRAP   |
|                            | rs143498116 | 13       | 71286100  | A   | +      |        |          |              |           | +1 -0    | 13q21.33     |
|                            | rs72738786  | 15       | 78828086  | G   | +++    | +      |          |              | +++       | +7 -0    | CHRNA3/5     |
|                            | rs7177338   | 15       | 91428636  | A   |        | +++++  |          | -            |           | +7 -1    | FURIN/FES    |
|                            | rs429358    | 19       | 45411941  | T   |        | ++     | ---      | ++++         | -         | +6 -5    | APOE         |
|                            | rs6108784   | 20       | 10964366  | T   |        | ++++   |          |              |           | +4 -0    | C20orf187    |
| rs6011779                  | 20          | 61984317 | T         |     |        |        |          | +            | +1 -0     | CHRNA4   |              |
| Disc + Repli Meta-Analysis | rs1230666   | 1        | 114173410 | G   |        |        | +        |              |           | +1 -0    | MAG13        |
|                            | rs66906321  | 2        | 630070    | T   |        | +      | +        |              | +         | +3 -0    | TMEM18       |
|                            | rs1275922   | 2        | 26932887  | G   |        | ++++   |          | -            |           | +5 -1    | KCNK3        |
|                            | rs61348208  | 4        | 3089564   | T   |        | +      |          |              |           | +1 -0    | HTT          |
|                            | rs28971796  | 4        | 49151982  | G   |        |        | +        |              |           | +1 -0    | CHW43        |
|                            | rs9393691   | 6        | 26272829  | C   | +      |        |          |              |           | +1 -0    | HIST1        |
|                            | rs144078421 | 6        | 160424890 | G   |        | ++++   |          |              |           | +5 -0    | IGF2R        |
|                            | rs12924886  | 16       | 72075593  | A   |        | +      | +        |              |           | +2 -0    | HP           |
|                            | rs1011157   | 17       | 40960253  | C   |        | ++     | +        |              |           | +3 -0    | BECN1        |
|                            | rs142158911 | 19       | 11190534  | A   |        | ++++   | -        |              |           | +4 -1    | LDLR         |
| rs13037253                 | 20          | 60928724 | A         | +++ |        |        |          |              | +3 -0     | LAMA5    |              |
| Candidates                 | rs146254978 | 1        | 74867799  | C   |        |        |          |              |           | +0 -0    | FPGT/TNNI3K  |
|                            | rs6873545   | 5        | 42631264  | C   |        | +      |          |              |           | +1 -0    | d3-GHR       |
|                            | rs2149954   | 5        | 157820602 | T   |        | ++++   |          |              |           | +4 -0    | 5q33.3/EBF1  |
|                            | rs3130507   | 6        | 31147476  | G   | ++     |        | ++       |              |           | +4 -0    | PSORS1C3     |
|                            | rs3131621   | 6        | 31425499  | A   | +      |        |          |              | +         | +2 -0    | MICA/MICB    |
|                            | rs1627804   | 6        | 107400428 | C   |        |        |          |              |           | +0 -0    | BEND3        |
|                            | rs3800231   | 6        | 108998266 | A   |        | +      |          |              | +         | +2 -0    | FOXO3A       |
|                            | rs3764814   | 7        | 6189780   | T   |        |        |          |              |           | +0 -0    | USP42        |
|                            | rs2069837   | 7        | 22768027  | G   |        |        |          |              |           | +0 -0    | IL6          |
|                            | rs13262617  | 8        | 59838133  | G   |        |        |          |              |           | +0 -0    | TOX          |
|                            | rs61905747  | 11       | 113639842 | A   |        | +      |          |              |           | +1 -0    | ZW10         |
|                            | rs151091095 | 11       | 119289932 | G   |        |        |          |              |           | +0 -0    | USP2-AS1     |
|                            | rs7976168   | 12       | 83438559  | A   |        |        |          |              |           | +0 -0    | TMTC2        |
|                            | rs113946246 | 13       | 19429318  | T   |        |        |          |              |           | +0 -0    | ANKRD20A9P   |
| rs61949650                 | 13          | 64836488 | C         |     |        |        |          |              | +0 -0     | 13q21.31 |              |
| rs61978928                 | 14          | 75321714 | C         |     |        |        |          |              | +0 -0     | PROX2    |              |
|                            | Total       |          |           |     | +14 -3 | +67 -1 | +10 -5   | +4 -5        | +9 -2     | +104 -16 | Total        |

1780  
 1781  
 1782 *Reported associations have been identified in 325,292 UK Biobank subjects, their siblings, or parents,*  
 1783 *at FDR 5%. Protective (+) and deleterious (-) associations of longevity increasing variant with a*  
 1784 *disease are listed within diseases categories. Chr – Chromosome; Position – Base-pair position*  
 1785 *(GRCh37); A1 – the effect allele, increasing lifespan; Count of protective and deleterious with: Cancer*  
 1786 *– cancer incidence, CVD – cardiovascular disease incidence, Diabetes – Type 2 diabetes incidence,*  
 1787 *Neurological – neurological disease incidence, Pulmonary – pulmonary disease incidence. Except for*  
 1788 *LAMA5 and HLA-DQA1, loci associating protectively with cancer specifically affect lung cancer. For*  
 1789 *the list of individual associations, see Table S17.*

1790 **Table S7: Count of associations of lead SNPs with traits in PhenoScanner by broad**  
 1791 **disease category.**  
 1792

| Gene          | CANCER | CVD | OBESITY | DIABETES | NEURO | IMMUNE | PULMONARY | TOTAL |
|---------------|--------|-----|---------|----------|-------|--------|-----------|-------|
| CELSR2/PSRC1  | 0      | 10  | 3       | 2        | 1     | 0      | 0         | 16    |
| HLA-DQA1      | 0      | 0   | 0       | 0        | 2     | 1      | 0         | 3     |
| LPA           | 0      | 6   | 0       | 0        | 0     | 0      | 0         | 6     |
| ARPC1         | 0      | 0   | 1       | 1        | 0     | 0      | 0         | 2     |
| CLU           | 0      | 1   | 1       | 1        | 1     | 0      | 0         | 4     |
| CDKN2B-AS1    | 0      | 5   | 0       | 1        | 0     | 0      | 0         | 6     |
| GADD45G       | 0      | 2   | 3       | 0        | 0     | 0      | 0         | 5     |
| ATXN2/BRAP    | 0      | 7   | 6       | 2        | 1     | 13     | 1         | 30    |
| 13q21.33      | 0      | 0   | 0       | 0        | 0     | 0      | 0         | 0     |
| CHRNA3/5      | 1      | 1   | 3       | 0        | 4     | 0      | 3         | 12    |
| FURIN/FES     | 0      | 3   | 1       | 0        | 4     | 0      | 0         | 8     |
| APOE          | 0      | 4   | 0       | 0        | 3     | 0      | 0         | 7     |
| C20orf187     | 0      | 2   | 1       | 0        | 1     | 0      | 0         | 4     |
| CHRNA4        | 0      | 0   | 0       | 0        | 0     | 0      | 0         | 0     |
| MAGI3         | 0      | 1   | 0       | 0        | 0     | 6      | 0         | 7     |
| TMEM18        | 0      | 1   | 7       | 1        | 0     | 0      | 0         | 9     |
| KCNK3         | 0      | 2   | 5       | 0        | 0     | 0      | 0         | 7     |
| HTT           | 0      | 2   | 1       | 0        | 2     | 2      | 0         | 7     |
| CHW43         | 0      | 0   | 0       | 0        | 0     | 0      | 0         | 0     |
| HIST1         | 0      | 3   | 3       | 0        | 3     | 2      | 0         | 11    |
| IGF2R         | 0      | 4   | 0       | 0        | 0     | 1      | 0         | 5     |
| HP            | 0      | 5   | 2       | 0        | 1     | 0      | 0         | 8     |
| BECN1         | 0      | 0   | 0       | 0        | 0     | 0      | 0         | 0     |
| LDLR          | 0      | 7   | 0       | 0        | 0     | 0      | 0         | 7     |
| LAMA5         | 0      | 0   | 0       | 0        | 0     | 0      | 0         | 0     |
| FPGT/TNNI3K   | 0      | 0   | 0       | 0        | 0     | 0      | 0         | 0     |
| d3-GHR        | 0      | 0   | 1       | 0        | 0     | 0      | 0         | 1     |
| 5q33.3/EBF1   | 0      | 3   | 0       | 0        | 0     | 0      | 0         | 3     |
| MICA/MICB     | 0      | 2   | 1       | 0        | 1     | 5      | 1         | 10    |
| PSORS1C3      | 0      | 0   | 0       | 0        | 1     | 2      | 0         | 3     |
| BEND3         | 1      | 0   | 0       | 0        | 0     | 0      | 0         | 1     |
| FOXO3A        | 0      | 2   | 6       | 0        | 3     | 0      | 1         | 12    |
| USP42         | 0      | 0   | 0       | 0        | 0     | 0      | 0         | 0     |
| IL6           | 0      | 0   | 0       | 0        | 1     | 1      | 0         | 2     |
| TOX           | 0      | 2   | 0       | 0        | 0     | 0      | 0         | 2     |
| ZW10          | 0      | 0   | 1       | 0        | 0     | 0      | 0         | 1     |
| USP2-AS1      | 0      | 0   | 0       | 0        | 0     | 0      | 0         | 0     |
| TMTC2         | 0      | 0   | 1       | 0        | 0     | 0      | 0         | 1     |
| ANKRD20A9P    | 0      | 0   | 0       | 0        | 0     | 0      | 0         | 0     |
| 13q21.31      | 0      | 0   | 0       | 0        | 0     | 0      | 0         | 0     |
| PROX2         | 0      | 2   | 0       | 0        | 2     | 0      | 0         | 4     |
| SEMA6D        | 0      | 0   | 0       | 0        | 0     | 0      | 0         | 0     |
| MC2R          | 0      | 1   | 0       | 0        | 0     | 0      | 0         | 1     |
| EGLN2/CYP2A6  | 0      | 0   | 1       | 0        | 2     | 0      | 0         | 3     |
| EXOC3L2/MARK4 | 0      | 2   | 0       | 0        | 0     | 0      | 0         | 2     |
| TOTAL         | 2      | 80  | 48      | 8        | 33    | 33     | 6         | 210   |

1793 Associations of lead lifespan SNPs, i.e. those identified in the discovery sample (top) and/or the  
 1794 combined discovery and replication sample (middle), and candidate lifespan SNPs (bottom), were  
 1795 retrieved from the PhenoScanner database. Trait associations include those with SNPs in high linkage  
 1796 disequilibrium with lead variants ( $r^2 > 0.8$ ) and were only reported if they passed a FDR 5%  
 1797 significance threshold. Grouping by broad disease categories was done as follows: CVD –  
 1798 Cardiovascular diseases and risk factors, such as myocardial infarction, aortic valve calcification,  
 1800 hypertension, and cholesterol and triglyceride levels (15 traits). IMMUNE – autoimmune and chronic  
 1801 inflammation disorders, such as type 1 diabetes, rheumatoid arthritis, multiple sclerosis, inflammatory  
 1802 bowel diseases, and autoimmune liver and thyroid disease (15 traits). PULMONARY – pulmonary  
 1803 function and disease (exc. cancer): asthma, chronic pulmonary obstructive disorder, respiratory  
 1804 function and airflow obstruction (4 traits). DIABETES – type 2 diabetes and risk factors including  
 1805 glucose, HbA1c, and insulin levels (4 traits). OBESITY – Anthropometric measures such as BMI, body  
 1806 fat percentage, waist/hip circumference, weight, and obesity (7 traits). NEURO – Neurological  
 1807 disorders, such as Alzheimer’s, Parkinson’s, and Huntington’s disease, as well as depression, smoking  
 1808 addiction, and neuroticism (14 traits). See Table S18 for a full list of traits and associations.  
 1809

1810 **Table S8: Gene sets identified as enriched by VEGAS (FDR 5%), and corresponding**  
 1811 **results from DEPICT and PASCAL**  
 1812

| Pathway ID | Vegas Name                                                     | VEGAS Q | Nominal P |            |               |
|------------|----------------------------------------------------------------|---------|-----------|------------|---------------|
|            |                                                                |         | DEPICT GW | DEPICT Sug | PASCAL        |
| GO:0032994 | protein-lipid complex                                          | 0.0024  | 0.4007    | 0.1129     | 0.0179        |
| GO:0034358 | plasma lipoprotein particle                                    | 0.0024  | 0.4007    | 0.1129     | 0.0177        |
| HSA-174824 | lipoprotein metabolism                                         | 0.0024  | 0.3872    | 0.0640     | 0.0829        |
| GO:1990777 | lipoprotein particle                                           | 0.0024  |           |            |               |
| GO:0034362 | low-density lipoprotein particle                               | 0.0039  | 0.3886    | 0.1151     | 0.0367        |
| GO:0099572 | postsynaptic specialization                                    | 0.0065  |           |            |               |
| GO:0043691 | reverse cholesterol transport                                  | 0.0070  | 0.5256    | 0.0265     | 0.1451        |
| GO:0014069 | postsynaptic density                                           | 0.0097  | 0.9199    | 0.9629     | <b>0.0014</b> |
| GO:0030301 | cholesterol transport                                          | 0.0117  | 0.4263    | 0.1479     | 0.8495        |
| GO:0070328 | triglyceride homeostasis                                       | 0.0117  | 0.4761    | 0.7302     | 0.7190        |
| GO:0071813 | lipoprotein particle binding                                   | 0.0123  | 0.1612    | 0.1106     | 0.0206        |
| GO:0015918 | sterol transport                                               | 0.0123  | 0.4783    | 0.1716     | 0.8408        |
| GO:0034185 | apolipoprotein binding                                         | 0.0123  | 0.0413    | 0.0557     | 0.0107        |
| GO:0034364 | high-density lipoprotein particle                              | 0.0123  | 0.3213    | 0.1674     | 0.0115        |
| GO:0055090 | acylglycerol homeostasis                                       | 0.0123  |           |            |               |
| GO:0060076 | excitatory synapse                                             | 0.0123  | 0.8615    | 0.9116     | 0.0271        |
| GO:0060627 | regulation of vesicle-mediated transport                       | 0.0123  | 0.4993    | 0.8919     | 0.8416        |
| GO:0071814 | protein-lipid complex binding                                  | 0.0123  | 0.1612    | 0.1106     | 0.0209        |
| GO:0098794 | postsynapse                                                    | 0.0123  |           |            |               |
| GO:0034369 | plasma lipoprotein particle remodeling                         | 0.0130  | 0.7773    | 0.1237     | 0.0727        |
| GO:0097006 | regulation of plasma lipoprotein particle levels               | 0.0130  | 0.5828    | 0.0579     | 0.0458        |
| GO:0015850 | organic hydroxy compound transport                             | 0.0146  | 0.5181    | 0.6117     | 0.3329        |
| GO:0034368 | protein-lipid complex remodeling                               | 0.0161  | 0.7773    | 0.1237     | 0.0728        |
| GO:0042632 | cholesterol homeostasis                                        | 0.0170  | 0.1629    | 0.1931     | 0.0943        |
| GO:0055092 | sterol homeostasis                                             | 0.0187  | 0.1629    | 0.1931     | 0.0956        |
| GO:0034367 | macromolecular complex remodeling                              | 0.0216  | 0.7773    | 0.1237     | 0.0726        |
| GO:1902991 | regulation of amyloid precursor protein catabolic process      | 0.0216  |           |            |               |
| GO:0048261 | negative regulation of receptor-mediated endocytosis           | 0.0285  |           |            |               |
| 138068     | signaling events mediated by stem cell factor receptor (c-kit) | 0.0302  |           |            |               |
| GO:0042157 | lipoprotein metabolic process                                  | 0.0357  | 0.9639    | 0.2099     | 0.3124        |
| GO:0030425 | dendrite                                                       | 0.0377  | 0.5113    | 0.9234     | 0.0002        |
| GO:0006897 | endocytosis                                                    | 0.0426  | 0.7422    | 0.6595     | 0.2804        |
| GO:0071827 | plasma lipoprotein particle organization                       | 0.0443  | 0.6279    | 0.0703     | 0.0973        |

1813 *Pathway ID* – Gene ontology identifier or VEGAS ID number of the pathway; *VEGAS Name* – Name  
 1814 *of the pathway in VEGAS*; *VEGAS Q* – Empirical P value from VEGAS adjusted for multiple testing  
 1815 *using Benjamini-Hochberg correction*; *Nominal P* – Uncorrected P value obtained for enrichment of  
 1816 *the pathway using each method*; *DEPICT GW*: DEPICT analysis run on genome-wide significant  
 1817 *variants ( $P < 5 \times 10^{-8}$ )*; *DEPICT Sug* – DEPICT analysis run on variants passing suggestive significance  
 1818 *( $P < 1 \times 10^{-5}$ )*; *PASCAL* – PASCAL analysis using dichotomised gene set from DEPICT. Grey boxes  
 1819 *indicate there was no gene set in DEPICT matching the VEGAS gene set. Green boxes highlight*  
 1820 *nominally significant P values. P values remaining significant after correcting for multiple comparisons*  
 1821 *with VEGAS are listed in bold.*  
 1822  
 1823



1824 **Table S9: Bayesian GWAS - Multivariate effect estimates for the 16 traits chosen by the**  
 1825 **AIC based stepwise model selection**  
 1826

| Trait                                       | Causal Effect Estimate | SE    | P        |
|---------------------------------------------|------------------------|-------|----------|
| Cholesterol LDL (GLGC)                      | -0.139                 | 0.007 | 1.25E-81 |
| Education level, years of schooling (SSGAC) | 0.218                  | 0.012 | 3.62E-75 |
| Body mass index (GIANT)                     | -0.146                 | 0.012 | 1.55E-31 |
| Coronary Artery Disease (CARDIoGRAM)        | -0.253                 | 0.030 | 1.19E-16 |
| Cholesterol HDL (GLGC)                      | 0.048                  | 0.008 | 4.18E-10 |
| Smoking, cigarettes per day (TAG)           | -0.437                 | 0.055 | 2.31E-15 |
| Triglycerides (GLGC)                        | -0.029                 | 0.009 | 2.05E-03 |
| Type 2 diabetes (DIAGRAM)                   | -0.080                 | 0.021 | 1.81E-04 |
| Smoking, current vs former (TAG)            | 0.215                  | 0.078 | 5.86E-03 |
| Schizophrenia (PGC)                         | -0.031                 | 0.011 | 3.74E-03 |
| Glucose (MAGIC)                             | -0.070                 | 0.025 | 5.88E-03 |
| Smoking, ever (TAG)                         | -0.227                 | 0.071 | 1.30E-03 |
| Insulin (MAGIC)                             | -0.191                 | 0.066 | 3.62E-03 |
| Multiple Sclerosis (GeneMSA)                | -0.083                 | 0.038 | 2.78E-02 |
| Schizophrenia 2 (PGC)                       | -0.127                 | 0.061 | 3.94E-02 |
| Education level, college completion (SSGAC) | 0.080                  | 0.041 | 4.89E-02 |

1827

1828

1829 *The multivariate MR identified 16 traits (58 tested, see McDaid et al, 2017 for an exhaustive list) with*  
 1830 *significant causal effect on lifespan and used the effect estimates to create the prior assumption of the*  
 1831 *expected effect size of each variant on lifespan, in the (Bayesian) iGWAS. Effect Estimate – the*  
 1832 *estimated effect of standardized trait on standardized lifespan, in multivariate model. SE – the standard*  
 1833 *error of the estimated effect, in multivariate model. P – the P value (two sided) from MR, for testing*  
 1834 *association between standardized trait and standardized lifespan, in multivariate model.*

1835

1836

1837

1838 **Table S10: 82 SNPs significantly associated with lifespan at 1% FDR and the SNP's**  
 1839 **associations with risk factors.**

1840

1841 [see Supplementary Information Excel File]

1842

1843 *Bayesian iGWAS was performed using observed association results from combined GWAS (discovery*  
 1844 *and replication sample) and prior was based on 16 traits selected by AIC based stepwise model*  
 1845 *selection. Bayes Factor were calculated to compare effect estimates observed in the conventional*  
 1846 *GWAS to the prior effect computed. Empirical P values were assigned using a permutation approach*  
 1847 *and further corrected for multiple testing using Benjamini-Hochberg correction. Chr – Chromosome,*  
 1848 *Position – Base-pair position on chromosome (GRCh37), A1 – Effect Allele, Freq1 – Frequency of the*  
 1849 *A1 allele (from conventional GWAS), Beta1 (from conventional GWAS), SE – Standard Error of Beta1,*  
 1850 *Years – Years of lifespan gained for carrying one copy of the A1 allele (from conventional GWAS), P –*  
 1851 *P value (from conventional GWAS), PriorEffect – Prior effect estimate calculated from the summary*  
 1852 *statistics data for the 16 risk factors identified, PriorSE – Standard Error of the prior effect estimate,*  
 1853 *LogBF – Log of the observed Bayes Factor, P\_BF – Empirical P value from a permutation approach*  
 1854 *for the log Bayes Factor. Final columns show the P value of each SNP in the studies used to calculate*  
 1855 *the prior, if the P value is significant after Bonferroni multiple testing correction ( $P < 3.81 \times 10^{-5}$ ,  $82 \times 16$*   
 1856 *tests) the cell is shaded green. Counts of these significant associations by SNP/trait are shown in the*  
 1857 *final column/row.*

1858 **Table S11: Replication of lead SNPs associating with lifespan using published**  
1859 **longevity GWAS**

1860

1861 [See Supplementary Information Excel File]

1862

1863 *At or near* – gene, cluster of genes, or cytogenetic band near lead SNP; *Proxy* – the rsID of the nearest  
1864 ( $r^2$ ) SNP reported by Deelen et al.; *Chr* – Chromosome; *Position* – Base-pair position (GRCh37); *A1*  
1865 – the effect allele, *A0* – the reference allele, *Freq1* – the frequency of A1 allele; *Beta1* – the log hazard  
1866 ratio (in self) for a carrier of 1 copy of A1; *SE* – standard error; *P* – P value for test of association  
1867 between proxy and lifespan (for IVM replication this is one sided); *Discovery* – the combined GWAS of  
1868 UKBB genomically British, UKBB other and LifeGen; *Replication* – the GWAMAs of Deelen et al (15),  
1869 Broer et al (10) and Walter et al (28), recalibrated (using APOE) to log hazard ratios and then  
1870 combined using inverse-variance meta-analysis; *Alpha* – the ratio of effect size in replication to  
1871 discovery (note as this was calibrated on APOE, that result was necessarily 1).

1872

1873

1874 **Table S12: Predicted causal genes using SMR-HEIDI test and expression QTLs**

1875

1876 [see Supplementary Information Excel File]

1877

1878 *48 tissues of the GTEx project were analysed by taking the significant eQTL signals. Only genes that*  
1879 *pass 5% false discovery rate threshold for the SMR test and  $P > 0.05$  threshold for HEIDI test are listed*  
1880 *for their corresponding loci. Chr – chromosome, Position – Base-pair position (GRCh37), At or near*  
1881 *– Nearest gene, cluster of genes, or cytogenetic band to lead SNP.*

1882

1883

1884

1885 **Table S13: Predicted causal CpG probes using SMR-HEIDI and methylation QTLs**

1886

1887 [see Supplementary Information Excel File]

1888

1889 *Methylation QTLs from blood tissue were analysed. Only CpG probes that pass 5% false discovery rate*  
1890 *threshold for the SMR test and  $P > 0.05$  threshold for HEIDI test are listed for their corresponding*  
1891 *loci. Chr – chromosome, (Probe) Position – Base-pair position (GRCh37), At or near – Nearest gene,*  
1892 *cluster of genes, or cytogenetic band to lead SNP.*

1893 **Table S14: Evidence of allelic heterogeneity of the lifespan loci via identification of**  
 1894 **secondary associations using SOJO**  
 1895

| Lead Variant | At or near   | R-squared<br>(Lead Variant) | R-squared<br>(SOJO) | N SOJO | Ratio   |
|--------------|--------------|-----------------------------|---------------------|--------|---------|
| rs7528419    | CELSR2/PSRC1 | 6.65E-08                    | 4.55E-06            | 30     | 68.50   |
| rs34967069   | HLA-DQA1     | 6.33E-06                    | 3.37E-05            | 29     | 5.32    |
| rs118039278  | LPA          | 7.07E-05                    | 1.89E-04            | 15     | 2.67    |
| rs10225529   | ARPC1        | 5.26E-07                    | 2.04E-05            | 23     | 38.80   |
| rs7844965    | CLU          | 1.42E-06                    | 4.02E-06            | 11     | 2.84    |
| rs1556516    | CDKN2B-AS1   | 4.54E-05                    | 4.61E-05            | 2      | 1.01    |
| rs10908903   | GADD45G      | 2.70E-06                    | 3.32E-06            | 22     | 1.23    |
| rs11065979   | ATXN2/BRAP   | 1.07E-05                    | 1.14E-05            | 2      | 1.05    |
| rs143498116  | 13q21.33     | 1.65E-06                    | 2.55E-05            | 21     | 15.50   |
| rs72738786   | CHRNA3/5     | 5.27E-05                    | 7.29E-05            | 30     | 1.39    |
| rs7177338    | FURIN/FES    | 2.48E-05                    | 8.21E-05            | 29     | 3.30    |
| rs429358     | APOE         | 2.04E-04                    | 2.63E-04            | 30     | 1.29    |
| rs6108784    | C20orf187    | 4.54E-06                    | 2.33E-05            | 11     | 5.12    |
| rs6011779    | CHRNA4       | 5.09E-07                    | 3.23E-06            | 8      | 6.36    |
| rs1230666    | MAGI3        | 1.66E-05                    | 1.74E-05            | 2      | 1.05    |
| rs66906321   | TMEM18       | 5.66E-09                    | 2.40E-05            | 23     | 4235.00 |
| rs1275922    | KCNK3        | 3.25E-05                    | 4.17E-05            | 30     | 1.28    |
| rs61348208   | HTT          | 3.39E-05                    | 4.52E-05            | 3      | 1.33    |
| rs28971796   | CHW43        | 5.69E-06                    | 6.02E-06            | 2      | 1.06    |
| rs9393691    | HIST1        | 1.43E-05                    | 4.38E-05            | 18     | 3.07    |
| rs144078421  | IGF2R        | 9.78E-06                    | 5.52E-05            | 17     | 5.63    |
| rs12924886   | HP           | 6.14E-05                    | 1.34E-04            | 3      | 2.18    |
| rs1011157    | BECN1        | 9.60E-06                    | 4.37E-05            | 30     | 4.56    |
| rs142158911  | LDLR         | 5.05E-05                    | 5.65E-05            | 6      | 1.12    |
| rs13037253   | LAMA5        | 1.16E-05                    | 1.18E-05            | 2      | 1.01    |
| rs10211471   | AC079135.1   | 3.63E-05                    | 5.33E-05            | 5      | 1.47    |
| rs113160991  | POM121C      | 1.22E-05                    | 1.23E-05            | 20     | 1.01    |
| rs56179563   | ZC3HC1       | 5.27E-05                    | 6.64E-05            | 30     | 1.26    |
| rs2519093    | ABO          | 1.66E-05                    | 1.66E-05            | 1      | 1.00    |
| Total        |              | 7.90E-04                    | 1.41E-03            | 455    | 1.79    |

1896  
 1897  
 1898 *SOJO maps additional variants of each locus besides the top variant by implementing a LASSO*  
 1899 *regression across the locus. R-squared (Top variant): the captured narrow-sense heritability by the top*  
 1900 *variant of each locus. R-squared (SOJO): out-of-sample prediction R-squared achieved in the*  
 1901 *replication cohort, i.e. the captured narrow-sense heritability of each locus by the polygenic score*  
 1902 *across multiple variants within the same locus; R-squared is on a non-intuitive scale here, as the*  
 1903 *phenotype is martingale residuals in the replication cohort, where a substantial proportion of the*  
 1904 *parents are still alive. It is therefore much lower than the proportion of lifespan variance explained for*  
 1905 *a set of subjects that are all dead. Nonetheless, the ratios of R-squared, which allow allelic*  
 1906 *heterogeneity to be assessed, remain valid. At or near – the gene, cluster of genes, or cytogenetic band*  
 1907 *in close proximity to the lead variant; N SOJO – The number of variants selected by SOJO, maximum*  
 1908 *is set to be 30; Ratio – The ratio of out of sample R-squared between using SOJO variants and top*  
 1909 *variant. A large ratio together with large N SOJO indicate there is higher allelic heterogeneity at the*  
 1910 *locus.*

1911 **Table S15: Detailed results of the fine-mapping analysis by SOJO**

1912

1913 [see Supplementary Information Excel File]

1914

1915 *SOJO maps additional variants of each locus besides the top variant by implementing a LASSO*  
1916 *regression across the locus. This table expands the results of Table S14. Each additional variant at*  
1917 *each locus is reported. R-squared is on a non-intuitive scale here, as the phenotype is martingale*  
1918 *residuals in the replication cohort, where a substantial proportion of the parents are still alive. It is*  
1919 *therefore much lower than the proportion of lifespan variance explained for a set of subjects that are*  
1920 *all dead. Nonetheless, the ratios of R-squared, which allow allelic heterogeneity to be assessed, remain*  
1921 *valid. R-squared (Top variant) – the captured narrow-sense heritability by the top variant of each locus.*  
1922 *R-squared (SOJO) – out-of-sample prediction R-squared achieved in the replication cohort, i.e. the*  
1923 *captured narrow-sense heritability of each locus by the polygenic score across multiple variants within*  
1924 *the same locus. RA – reference allele. EA(F) – effective allele (frequency). r – LD correlation with the*  
1925 *top variant in each locus.*

1926

1927

1928 **Table S16: Grouping of UK Biobank disease codes into diseases and major disease**  
1929 **categories**

1930

1931 [see Supplementary Information Excel File]

1932

1933 *UKBB phenotypes included 29 self-reported non-cancer disease fields for the participants and each of*  
1934 *their parents, which included 474 integer-value coded diseases. These 474 diseases were aggregated*  
1935 *and meta-analysed into four major mortality-increasing disease groups, namely CVD, diabetes,*  
1936 *neurological and pulmonary disorders. Cancer was the fifth major disease group and was coded as*  
1937 *either the occurrence or absence of cancers instances throughout the participant's lifetime. Codes not*  
1938 *shown were excluded from the analysis.*

1939

1940

1941 **Table S17: Full list of associations of lead SNPs with subject, sibling, and parental**  
1942 **diseases in UK Biobank**

1943

1944 [see Supplementary Information Excel File]

1945

1946 *Disease associations have been identified in 325,292 UK Biobank subjects, their siblings, or parents,*  
1947 *at FDR 5%. At or near – Gene, cluster of genes, or cytogenetic band in close proximity to lead variant.*  
1948 *A1 – Longevity allele of lead SNP. Trait – Disease reported by UK Biobank subject (kin). N – Number*  
1949 *of individuals tested. Cases – Number of reported individuals or kin carrying the disease. Beta – log*  
1950 *OR of NOT carrying the disease (i.e. positive beta indicates the longevity SNP protects from disease).*  
1951 *SE – Standard Error. P – Two-sided P value. Q – Benjamin-Hochberg adjusted P value*

1952 **Table S18: Full list of associations of lead SNPs with traits in PhenoScanner by broad**  
1953 **disease category**

1954  
1955 [see Supplementary Information Excel File]

1956  
1957 *Associations of lead lifespan SNPs identified in the discovery sample and/or the combined discovery*  
1958 *and replication sample, and candidate lifespan SNPs, were retrieved from the PhenoScanner database.*  
1959 *Trait associations include those with SNPs in high linkage disequilibrium with lead variants ( $r^2 > 0.8$ )*  
1960 *and were only reported if they passed a FDR 5% significance threshold. Gene – Nearest gene or cluster*  
1961 *of genes to lead variant, rsID – SNP identifier of lead or proxy SNP, Alleles – Effect allele and non-*  
1962 *effect allele, matched to the lead SNP alleles,  $r^2$  – correlation coefficient between lead and proxy SNP,*  
1963 *Trait – trait name reported by PhenoScanner, P – P value of association, Q – Benjamini-Hochberg*  
1964 *FDR adjusted P value, PMID – PubMed identification number of study reporting the association,*  
1965 *Category – Disease category the association has been assigned to.*

1966  
1967  
1968 **Table S19: List of genome-wide significant disease variants, their association with**  
1969 **disease in UK Biobank and their lifespan variance explained**

1970  
1971 [see Supplementary Information Excel File]

1972  
1973 *Genome-wide significant disease SNPs from the GWAS catalog are listed with the amount of lifespan*  
1974 *variance explained (LVE), with disease-protective alleles signed positively when increasing lifespan*  
1975 *and signed negatively when decreasing lifespan. SNPs with limited evidence of an effect on lifespan are*  
1976 *greyed out: an FDR cut-off of 1.55% is applied simultaneously across all diseases, allowing for 1 false*  
1977 *positive among all significant SNPs. Secondary pleiotropic SNPs (i.e. those associating strongly with*  
1978 *another one of the diseases, as assessed by PheWAS in UK Biobank) are coloured, as less relevant to*  
1979 *the disease in question. Of these, turquoise SNPs show one or more alternative disease associations in*  
1980 *the same direction and at least twice as strong (double Z statistic) as the principal disease, while brown*  
1981 *SNPs show one or more significant associations with alternative disease in the opposite direction that*  
1982 *explains the negative association of the disease-protective SNP with lifespan. At or near – Gene, cluster*  
1983 *of genes, or cytogenetic band in close proximity to lead variant. Chr – Chromosome. Position – Base-*  
1984 *pair position on chromosome (build GRCh37). A1 – Allele protecting from disease or disease risk*  
1985 *factors. Freq1 – Frequency of the disease-protective allele in the discovery+replication sample. Years*  
1986 *– Years of lifespan gained for carrying one copy of the A1 allele. P – P value for association with*  
1987 *lifespan under CES assumption (left), P value for genome-wide significant association with disease as*  
1988 *reported in the GWAS catalog (right). Q – Benjamini-Hochberg FDR-corrected P value for association*  
1989 *with lifespan. LVE – Lifespan variance explained, signed positively when A1 increases lifespan and*  
1990 *negative when A1 decreases lifespan. Pleiotropic – SNP shows evidence of pleiotropy, see definition*  
1991 *above. Trait – Disease trait reported in GWAS catalog. Beta1 – log OR for having the reported disease,*  
1992 *or unit increase in risk factors associated with disease, per copy of A1 allele. PMID – PubMed*  
1993 *identification number of the study reporting the disease association. Z estimates – Z statistic for*  
1994 *association with disease in unrelated, Gen. British UK Biobank samples. Missing statistics indicate the*  
1995 *SNP is not present in the CES meta-analysis summary statistics and its LVE has been imputed from the*  
1996 *closest proxy (min.  $r^2 > 0.9$ ) or proxies if equally close.*

1997 **Table S20: Sex and age stratified effects on survival for 49 lifespan increasing variants**

1998

1999 [see Supplementary Information Excel File]

2000

2001 *At or near – Gene, cluster of genes, or cytogenetic band in close proximity to lead variant. Variant –*  
2002 *rsID, longevity allele. Parent – Parent. Age range – Lower limit to upper limit of age in analysis. N –*  
2003 *Number of lives used for the analysis (e.g. a parent aged 55 contributed to analysis of 40-50 and 50-*  
2004 *60, but not 60-70). Deaths – Number of deaths within the age range. Beta –  $\log_e(\text{protection ratio})$  for 1*  
2005 *copy of effect allele in self in the age band (i.e. 2 x observed due to kin cohort method). SE – Standard*  
2006 *error. Z – Test statistic for test of  $H_0$ . P – P value of two sided test of association.*

2007

2008

2009

2010 **Table S21: Effect sizes of sex and age moderators within fixed-effects with moderators'**  
2011 **model of longevity alleles for 49 SNPs**

2012

2013 [see Supplementary Information Excel File]

2014

2015 *At or near – Gene, cluster of genes, or cytogenetic band in close proximity to lead variant. Variant –*  
2016 *rsID, longevity allele. Beta – Moderator effect estimate of sex (categorical variable, being male) or age*  
2017 *(ordinal variable, mean age in age band) on lead SNP effect on lifespan. SE – Standard error. P – P*  
2018 *value for association of SNP lifespan effect size with age or sex. Q – Benjamini-Hochberg FDR-*  
2019 *corrected P value. Bolded lines contain sex or age-specific effects passing a 5% FDR threshold.*

2020

2021

2022

2023 **Table S22: Cell types enriched for lifespan heritability identified by stratified LD-score**  
2024 **regression**

2025

2026 [see Supplementary Information Excel File]

2027

2028 *Name – Default tissue or cell-type names from stratified LD-score regression data. Beta – regression*  
2029 *coefficient fitting baseline model and cell-type specific LD scores. SE – Standard Error. P – Two-sided*  
2030 *P value for regression coefficient. Q – Benjamini-Hochberg FDR corrected P value.*

2031

2032

2033

2034 **Table S23: Putative lifespan pathways highlighted by VEGAS2Pathway gene set**  
2035 **enrichment analysis**

2036

2037 [see Supplementary Information Excel File]

2038

2039 *Pathway – Reference number and name of gene set. nGenesMapped – Number of genes in the pathway*  
2040 *tagged by SNPs. nGenesUsed – Number of genes after pruning. nSamples – Number of permutations*  
2041 *used to calculate observed P value. ObservedP – Unadjusted P value for pathway enrichment.*  
2042 *empiricalP – Observed P value adjusted for pathway size. Q – Benjamini-Hochberg-adjusted empirical*  
2043 *P value. Genes – Genes present in the gene set*

2044 **Table S24: eQTL SNPs associated with lifespan are for genes whose expression varies**  
 2045 **with age**

| Threshold | # eQTLs |        | OR   | P       |
|-----------|---------|--------|------|---------|
|           | All     | Ageing |      |         |
| 5E-8      | 16      | 7      | 3.45 | 0.0176  |
| 5E-7      | 28      | 10     | 2.47 | 0.0266  |
| 5E-6      | 63      | 21     | 2.25 | 0.0046  |
| 5E-5      | 206     | 63     | 2.07 | 1.4E-05 |
| 5E-4      | 654     | 168    | 1.78 | 1.7E-07 |
| 0.005     | 1685    | 386    | 2.34 | 1.1E-14 |
| 0.05      | 2340    | 475    | 3.38 | 6.8E-11 |
| 1         | 2967    | 500    | -    | -       |

2046  
 2047 *We identified SNPs in our GWAS (discovery plus replication combined CES) that were also eQTLs i.e.*  
 2048 *associated with the expression of at least one gene in a dataset provided to us by the eQTLGen*  
 2049 *Consortium. A total of 2967 eQTLs after distance pruning (500kb) were present, of which 500 were*  
 2050 *associated with genes differentially expressed with age(101). We used Fisher's exact test to determine,*  
 2051 *amongst the set of eQTLs, if SNPs which were associated with lifespan (at varying thresholds of*  
 2052 *statistical significance) were enriched for SNPs associated with genes whose expression is age-related.*  
 2053 *Threshold – P value threshold for lifespan association. #eQTLs (All) – number of independent eQTLs*  
 2054 *passing the significance threshold. #eQTLs (Ageing) – number of independent eQTLs for genes*  
 2055 *differentially expressed with age passing the significance threshold. OR – Odds ratio. P – P value for*  
 2056 *Fisher's exact test.*

2057 **Table S25: Polygenic survival scores in independent samples are most predictive when**  
 2058 **including all markers**  
 2059

| Sample                                 | Parent  | N      | Deaths | Threshold | Beta | SE   | Mean Years | P       |
|----------------------------------------|---------|--------|--------|-----------|------|------|------------|---------|
| Scottish                               | Fathers | 23,071 | 18,255 | P < 5E-8  | 0.08 | 0.01 | 0.81       | 5.2E-08 |
|                                        |         |        |        | P < 1E-6  | 0.08 | 0.01 | 0.78       | 1.5E-07 |
|                                        |         |        |        | P < 1E-4  | 0.08 | 0.01 | 0.78       | 1.5E-07 |
|                                        |         |        |        | P < 0.05  | 0.08 | 0.01 | 0.82       | 3.9E-08 |
|                                        |         |        |        | P < 1     | 0.10 | 0.02 | 0.99       | 4.4E-11 |
|                                        | Mothers | 23,865 | 14,941 | P < 5E-8  | 0.08 | 0.02 | 0.84       | 3.1E-07 |
|                                        |         |        |        | P < 1E-6  | 0.09 | 0.02 | 0.91       | 2.7E-08 |
|                                        |         |        |        | P < 1E-4  | 0.11 | 0.02 | 1.12       | 1.3E-11 |
|                                        |         |        |        | P < 0.05  | 0.10 | 0.02 | 1.02       | 5.8E-10 |
|                                        |         |        |        | P < 1     | 0.12 | 0.02 | 1.19       | 5.8E-13 |
| English & Welsh (out-of-sample subset) | Fathers | 28,532 | 21,699 | P < 5E-8  | 0.07 | 0.01 | 0.73       | 8.3E-08 |
|                                        |         |        |        | P < 1E-6  | 0.08 | 0.01 | 0.82       | 1.7E-09 |
|                                        |         |        |        | P < 1E-4  | 0.08 | 0.01 | 0.84       | 6.8E-10 |
|                                        |         |        |        | P < 0.05  | 0.09 | 0.01 | 0.94       | 7.0E-12 |
|                                        |         |        |        | P < 1     | 0.12 | 0.01 | 1.21       | 2.9E-18 |
|                                        | Mothers | 29,538 | 17,648 | P < 5E-8  | 0.07 | 0.02 | 0.74       | 1.1E-06 |
|                                        |         |        |        | P < 1E-6  | 0.07 | 0.02 | 0.70       | 4.0E-06 |
|                                        |         |        |        | P < 1E-4  | 0.09 | 0.02 | 0.89       | 3.8E-09 |
|                                        |         |        |        | P < 0.05  | 0.12 | 0.02 | 1.18       | 8.2E-15 |
|                                        |         |        |        | P < 1     | 0.15 | 0.02 | 1.48       | 1.9E-22 |

2060  
 2061 A polygenic risk score was made for each subject using GWAS results that did not include the  
 2062 subject sets under consideration. Parent survival information (age and alive/dead status) was  
 2063 used to test the association between survival and several polygenic risk scores with different  
 2064 P value thresholds. Sample – Out-of-sample subsets of UK Biobank individuals used for  
 2065 PGRS association. N – Number of reported parental lifespans by sample individuals. Deaths  
 2066 – Number of reported parental deaths by sample individuals. Threshold – Criteria for SNPs to  
 2067 be included in the polygenic score. Beta –  $\text{Log}_e(\text{protection ratio})$  per standard deviation of  
 2068 polygenic score, doubled to reflect the effect of the score on offspring survival. SE – standard  
 2069 error of the effect estimate. Mean Years – Mean years of life gained per standard deviation in  
 2070 PGRS. P – P value of the predicted effect of the polygenic score on lifespan.



2071  
2072  
2073

**Table S26: Sex and age-stratified association of polygenic score on lifespan**

| Sample   | Parent  | N      | Deaths | Ages      | Beta  | SE   | P       |
|----------|---------|--------|--------|-----------|-------|------|---------|
| Scottish | Mothers | 24,168 | 662    | 40 to 50  | 0.21  | 0.04 | 0.0062  |
| Scottish | Mothers | 23,574 | 1,515  | 50 to 60  | 0.23  | 0.03 | 8.5E-06 |
| Scottish | Mothers | 22,286 | 3,114  | 60 to 70  | 0.18  | 0.02 | 3.0E-07 |
| Scottish | Mothers | 18,408 | 5,077  | 70 to 80  | 0.13  | 0.02 | 3.1E-06 |
| Scottish | Mothers | 10,051 | 4,938  | 80 to 90  | 0.10  | 0.02 | 7.0E-04 |
| Scottish | Mothers | 2,014  | 1,298  | 90 to 120 | 0.12  | 0.03 | 0.0411  |
| Scottish | Fathers | 23,363 | 1,067  | 40 to 50  | 0.17  | 0.04 | 0.0062  |
| Scottish | Fathers | 22,452 | 2,754  | 50 to 60  | 0.18  | 0.02 | 2.4E-06 |
| Scottish | Fathers | 20,014 | 5,151  | 60 to 70  | 0.19  | 0.02 | 3.4E-11 |
| Scottish | Fathers | 14,876 | 6,512  | 70 to 80  | 0.07  | 0.01 | 0.0041  |
| Scottish | Fathers | 6,506  | 4,019  | 80 to 90  | 0.11  | 0.02 | 5.9E-04 |
| Scottish | Fathers | 173    | 102    | 90 to 120 | 0.24  | 0.18 | 0.4721  |
| E&W      | Mothers | 32,232 | 802    | 40 to 50  | 0.18  | 0.04 | 0.0104  |
| E&W      | Mothers | 31,528 | 1,814  | 50 to 60  | 0.21  | 0.03 | 9.4E-06 |
| E&W      | Mothers | 29,982 | 3,927  | 60 to 70  | 0.23  | 0.02 | 6.2E-13 |
| E&W      | Mothers | 24,637 | 6,269  | 70 to 80  | 0.17  | 0.01 | 2.3E-11 |
| E&W      | Mothers | 14,010 | 6,591  | 80 to 90  | 0.17  | 0.01 | 5.7E-12 |
| E&W      | Mothers | 2,957  | 1,835  | 90 to 120 | 0.10  | 0.03 | 0.0477  |
| E&W      | Fathers | 31,129 | 1,312  | 40 to 50  | 0.14  | 0.03 | 0.0115  |
| E&W      | Fathers | 30,015 | 3,232  | 50 to 60  | 0.18  | 0.02 | 3.2E-07 |
| E&W      | Fathers | 27,214 | 6,334  | 60 to 70  | 0.18  | 0.01 | 2.8E-12 |
| E&W      | Fathers | 20,698 | 8,382  | 70 to 80  | 0.14  | 0.01 | 1.1E-10 |
| E&W      | Fathers | 9,705  | 5,749  | 80 to 90  | 0.08  | 0.02 | 0.0040  |
| E&W      | Fathers | 321    | 191    | 90 to 120 | -0.25 | 0.12 | 0.2301  |

2074

2075 *A polygenic risk score was made for each subject using GWAS results that did not include the subject*  
 2076 *sets under consideration. Parent survival information (age and alive/dead status) was stratified by sex*  
 2077 *and age. Sample – Out-of-sample subsets of UK Biobank individuals used for PGRS association (E&W:*  
 2078 *English and Welsh). N – Number of parental lifespans reported by sample individuals and used for the*  
 2079 *analysis (e.g. a parent aged 55 contributed to analysis of 40-50 and 50-60, but not 60-70). Deaths –*  
 2080 *Number of parental deaths within the age range reported by sample individuals. Ages – Lower limit to*  
 2081 *upper limit of age in analysis. Beta –  $\log_e(\text{protection ratio})$  for 1 standard deviation in polygenic score*  
 2082 *in self in the age band (i.e. 2 x observed due to kin cohort method). SE – Standard error. P – P value of*  
 2083 *two sided test of association.*

2084

2085

**Table S27: Associations of polygenic score with diseases in UK Biobank**

2086

[see Supplementary Information Excel File]

2087

2088

2089 *A polygenic risk score was made for each subject using GWAS results that did not include the subject*  
 2090 *sets under consideration. Disease associations have been identified in the subjects, their siblings, or*  
 2091 *parents, at FDR 5%. Sample — Out-of-sample subsets of UK Biobank individuals used for PGRS*  
 2092 *association (E&W: English and Welsh). Kin – Family member for which the disease was reported. Trait*  
 2093 *– Disease reported by UK Biobank subject. N – Number of individuals tested. Cases – Number of*  
 2094 *reported individuals or kin carrying the disease. Beta –  $\log$  OR of NOT carrying the disease per*  
 2095 *standard deviation of PGRS (i.e. positive beta indicates the PGRS protects from disease). SE – Standard*  
 2096 *Error. P – Two-sided P value. Q – Benjamin-Hochberg adjusted P value*

2097

2098 *References*

2099

2100 1. van den Berg N, Beekman M, Smith KR, Janssens A, Slagboom PE. Historical  
2101 demography and longevity genetics: Back to the future. *Ageing Research Reviews*.  
2102 2017;38:28-39.

2103 2. Kaplanis J, Gordon A, Shor T, Weissbrod O, Geiger D, Wahl M, et al. Quantitative  
2104 analysis of population-scale family trees with millions of relatives. 2018.

2105 3. Joshi PK, Fischer K, Schraut KE, Campbell H, Esko T, Wilson JF. Variants near  
2106 CHRNA3/5 and APOE have age- and sex-related effects on human lifespan. *Nat Commun*.  
2107 2016;7:11174.

2108 4. Pilling LC, Atkins JL, Bowman K, Jones SE, Tyrrell J, Beaumont RN, et al. Human  
2109 longevity is influenced by many genetic variants: evidence from 75,000 UK Biobank  
2110 participants. *Aging (Albany NY)*. 2016;8(3):547-60.

2111 5. Joshi PK, Pirastu N, Kentistou KA, Fischer K, Hofer E, Schraut KE, et al. Genome-  
2112 wide meta-analysis associates HLA-DQA1/DRB1 and LPA and lifestyle factors with human  
2113 longevity. *Nat Commun*. 2017;8(1):910.

2114 6. Pilling LC, Kuo CL, Sicinski K, Tamosauskaite J, Kuchel GA, Harries LW, et al. Human  
2115 longevity: 25 genetic loci associated in 389,166 UK biobank participants. *Aging (Albany NY)*.  
2116 2017;9(12):2504-20.

2117 7. Deelen J, Beekman M, Uh HW, Helmer Q, Kuningas M, Christiansen L, et al. Genome-  
2118 wide association study identifies a single major locus contributing to survival into old age; the  
2119 APOE locus revisited. *Aging Cell*. 2011;10(4):686-98.

2120 8. Sebastiani P, Solovieff N, DeWan AT, Walsh KM, Puca A, Hartley SW, et al. Genetic  
2121 Signatures of Exceptional Longevity in Humans. *PLoS One*. 2012;7(1).

2122 9. Beekman M, Blanche H, Perola M, Hervonen A, Bezrukov V, Sikora E, et al. Genome-  
2123 wide linkage analysis for human longevity: Genetics of Healthy Aging Study. *Aging Cell*.  
2124 2013;12(2):184-93.

2125 10. Broer L, Buchman AS, Deelen J, Evans DS, Faul JD, Lunetta KL, et al. GWAS of  
2126 longevity in CHARGE consortium confirms APOE and FOXO3 candidacy. *J Gerontol A Biol  
2127 Sci Med Sci*. 2015;70(1):110-8.

2128 11. Sebastiani P, Gurinovich A, Bae H, Andersen S, Malovini A, Atzmon G, et al. Four  
2129 Genome-Wide Association Studies Identify New Extreme Longevity Variants. *J Gerontol A  
2130 Biol Sci Med Sci*. 2017;72(11):1453-64.

2131 12. Zeng Y, Nie C, Min J, Liu X, Li M, Chen H, et al. Novel loci and pathways significantly  
2132 associated with longevity. *Scientific reports*. 2016;6.

2133 13. Flachsbarth F, Caliebe A, Kleindorp R, Blanché H, von Eller-Eberstein H, Nikolaus S,  
2134 et al. Association of FOXO3A variation with human longevity confirmed in German  
2135 centenarians. *Proceedings of the National Academy of Sciences*. 2009;106(8):2700-5.

2136 14. Newman AB, Walter S, Lunetta KL, Garcia ME, Slagboom PE, Christensen K, et al. A  
2137 meta-analysis of four genome-wide association studies of survival to age 90 years or older:  
2138 the Cohorts for Heart and Aging Research in Genomic Epidemiology Consortium. *J Gerontol  
2139 A Biol Sci Med Sci*. 2010;65(5):478-87.

2140 15. Deelen J, Beekman M, Uh HW, Broer L, Ayers KL, Tan Q, et al. Genome-wide  
2141 association meta-analysis of human longevity identifies a novel locus conferring survival  
2142 beyond 90 years of age. *Hum Mol Genet*. 2014;23(16):4420-32.

2143 16. Sebastiani P, Nussbaum L, Andersen SL, Black MJ, Perls TT. Increasing Sibling  
2144 Relative Risk of Survival to Older and Older Ages and the Importance of Precise Definitions  
2145 of "Aging," "Life Span," and "Longevity". *J Gerontol A Biol Sci Med Sci*. 2016;71(3):340-6.

2146 17. Deloukas P, Kanoni S, Willenborg C, Farrall M, Assimes TL, Thompson JR, et al.  
2147 Large-scale association analysis identifies new risk loci for coronary artery disease. *Nat  
2148 Genet*. 2013;45(1):25-33.

2149 18. Sung YJ, Winkler TW, de Las Fuentes L, Bentley AR, Brown MR, Kraja AT, et al. A  
2150 Large-Scale Multi-ancestry Genome-wide Study Accounting for Smoking Behavior Identifies  
2151 Multiple Significant Loci for Blood Pressure. *Am J Hum Genet*. 2018;102(3):375-400.

- 2152 19. Malik R, Chauhan G, Traylor M, Sargurupremraj M, Okada Y, Mishra A, et al.  
2153 Multiancestry genome-wide association study of 520,000 subjects identifies 32 loci associated  
2154 with stroke and stroke subtypes. *Nat Genet.* 2018;50(4):524-37.
- 2155 20. Schmit SL, Edlund CK, Schumacher FR, Gong J, Harrison TA, Huyghe JR, et al. Novel  
2156 Common Genetic Susceptibility Loci for Colorectal Cancer. *J Natl Cancer Inst.* 2018.
- 2157 21. Schumacher FR, Al Olama AA, Berndt SI, Benlloch S, Ahmed M, Saunders EJ, et al.  
2158 Association analyses of more than 140,000 men identify 63 new prostate cancer susceptibility  
2159 loci. *Nat Genet.* 2018.
- 2160 22. Lewontin RC. Senior Lecture, Annual Short Course on Medical and Experimental  
2161 Mammalian Genetics, Bar Harbor, Maine, 1968. *International Journal of Epidemiology.*  
2162 2016;45(3):654-64.
- 2163 23. Bycroft CF, Colin ; Petkova, Desislava ; Band, Gavin ; Lloyd T Elliott; Kevin Sharp;  
2164 Allan Motyer; Damjan Vukcevic; Olivier Delaneau, Jared O'Connell, Adrian Cortes, Samantha  
2165 Welsh, Gil McVean, Stephen Leslie, Peter Donnelly; Jonathan Marchini. Genome-wide  
2166 genetic data on ~500, 000 UK Biobank participants 2017 [Available from:  
2167 <https://doi.org/10.1101/166298>.
- 2168 24. Wacholder S, Hartge P, Struwing JP, Pee D, McAdams M, Brody L, et al. The kin-  
2169 cohort study for estimating penetrance. *Am J Epidemiol.* 1998;148(7):623-30.
- 2170 25. Staley JR, Blackshaw J, Kamat MA, Ellis S, Surendran P, Sun BB, et al.  
2171 PhenoScanner: a database of human genotype-phenotype associations. *Bioinformatics.*  
2172 2016;32(20):3207-9.
- 2173 26. Ben-Avraham D, Govindaraju DR, Budagov T, Fradin D, Durda P, Liu B, et al. The GH  
2174 receptor exon 3 deletion is a marker of male-specific exceptional longevity associated with  
2175 increased GH sensitivity and taller stature. *Sci Adv.* 2017;3(6):e1602025.
- 2176 27. Flachsbart F, Caliebe A, Kleindorp R, Blanche H, von Eller-Eberstein H, Nikolaus S,  
2177 et al. Association of FOXO3A variation with human longevity confirmed in German  
2178 centenarians. *Proc Natl Acad Sci U S A.* 2009;106(8):2700-5.
- 2179 28. Walter S, Atzmon G, Demerath EW, Garcia ME, Kaplan RC, Kumari M, et al. A  
2180 genome-wide association study of aging. *Neurobiol Aging.* 2011;32(11):2109 e15-28.
- 2181 29. MacArthur J, Bowler E, Cerezo M, Gil L, Hall P, Hastings E, et al. The new NHGRI-  
2182 EBI Catalog of published genome-wide association studies (GWAS Catalog). *Nucleic Acids*  
2183 *Res.* 2016.
- 2184 30. Cooper JD, Smyth DJ, Smiles AM, Plagnol V, Walker NM, Allen JE, et al. Meta-  
2185 analysis of genome-wide association study data identifies additional type 1 diabetes risk loci.  
2186 *Nature Genetics.* 2008;40(12):1399.
- 2187 31. Raychaudhuri S, Remmers EF, Lee AT, Hackett R, Guiducci C, Burt NP, et al.  
2188 Common variants at CD40 and other loci confer risk of rheumatoid arthritis. *Nature Genetics.*  
2189 2008;40(10):1216.
- 2190 32. Livingstone SJ, Levin D, Looker HC, Lindsay RS, Wild SH, Joss N, et al. Estimated life  
2191 expectancy in a Scottish cohort with type 1 diabetes, 2008-2010. *Jama.* 2015;313(1):37-44.
- 2192 33. Myllykangas-Luosujarvi R, Aho K, Kautiainen H, Isomaki H. Shortening of life span and  
2193 causes of excess mortality in a population-based series of subjects with rheumatoid arthritis.  
2194 *Clin Exp Rheumatol.* 1995;13(2):149-53.
- 2195 34. Peters MJ, Joehanes R, Pilling LC, Schurmann C, Conneely KN, Powell J, et al. The  
2196 transcriptional landscape of age in human peripheral blood. *Nat Commun.* 2015;6:8570.
- 2197 35. McDaid AF, Joshi PK, Porcu E, Komljenovic A, Li H, Sorrentino V, et al. Bayesian  
2198 association scan reveals loci associated with human lifespan and linked biomarkers. *Nat*  
2199 *Commun.* 2017;8:15842.
- 2200 36. Kenyon C, Chang J, Gensch E, Rudner A, Tabtiang R. A *C. elegans* mutant that lives  
2201 twice as long as wild type. *Nature.* 1993;366(6454):461.
- 2202 37. Hwangbo DS, Gersham B, Tu M-P, Palmer M, Tatar M. *Nature.* 2004;429(6991):562.
- 2203 38. Donlon TA, Morris BJ, Chen R, Masaki KH, Allsopp RC, Willcox DC, et al. FOXO3  
2204 longevity interactome on chromosome 6. *Aging Cell.* 162017. p. 1016-25.

- 2205 39. Flachsbart F, Dose J, Gentschew L, Geismann C, Caliebe A, Knecht C, et al.  
2206 Identification and characterization of two functional variants in the human longevity gene  
2207 FOXO3. *Nature Communications*. 2017;8(1):2063.
- 2208 40. Grossi V, Medical Genetics DoBSaHOD, University of Bari Aldo Moro, Bari 70124,  
2209 Italy, Forte G, Medical Genetics NifG, IRCCS 'S. de Bellis', Castellana Grotte (Ba) 70013,  
2210 Italy, Sanese P, Medical Genetics DoBSaHOD, University of Bari Aldo Moro, Bari 70124, Italy,  
2211 et al. The longevity SNP rs2802292 uncovered: HSF1 activates stress-dependent expression  
2212 of FOXO3 through an intronic enhancer. *Nucleic Acids Research*. 2018;46(11):5587-600.
- 2213 41. General La. Legal and General Group Results page 14 2018 [Available from:  
2214 [http://www.legalandgeneralgroup.com/files/pdf/results/2017/half\\_year\\_results/2017\\_half\\_year\\_results\\_slides.pdf](http://www.legalandgeneralgroup.com/files/pdf/results/2017/half_year_results/2017_half_year_results_slides.pdf).  
2215
- 2216 42. ABI. Concordat and Moratorium on Genetics and Insurance UK Government and ABI;  
2217 2014.
- 2218 43. Organization WH. Global Health Estimates 2015: Deaths by Cause, Age, Sex, by  
2219 Country and by Region, 2000-2015 Geneva: Who; 2016 [Available from:  
2220 [http://www.who.int/healthinfo/global\\_burden\\_disease/estimates/en/index1.html](http://www.who.int/healthinfo/global_burden_disease/estimates/en/index1.html).  
2221
- 2221 44. Mucci LA, Hjelmberg JB, Harris JR, Czene K, Havelick DJ, Scheike T, et al. Familial  
2222 Risk and Heritability of Cancer Among Twins in Nordic Countries. *JAMA*. 2016;315(1):68-76.
- 2223 45. Zdravkovic S, Wienke A, Pedersen NL, de Faire U. Genetic susceptibility of myocardial  
2224 infarction. *Twin Res Hum Genet*. 2007;10(6):848-52.
- 2225 46. Prevalence and penetrance of BRCA1 and BRCA2 mutations in a population-based  
2226 series of breast cancer cases. Anglian Breast Cancer Study Group. *Br J Cancer*.  
2227 2000;83(10):1301-8.
- 2228 47. Williams GC. Pleiotropy, natural selection, and the evolution of senescence. *Evolution*.  
2229 1957;11(4):398-411.
- 2230 48. Shen X, Klaric L, Sharapov S, Mangino M, Ning Z, Wu D, et al. Multivariate discovery  
2231 and replication of five novel loci associated with Immunoglobulin G N-glycosylation. *Nat*  
2232 *Commun*. 2017;8(1):447.
- 2233 49. Zhu Z, Zhang F, Hu H, Bakshi A, Robinson MR, Powell JE, et al. Integration of  
2234 summary data from GWAS and eQTL studies predicts complex trait gene targets. *Nature*  
2235 *Genetics*. 2016;48(5):481.
- 2236 50. Westra H-J, Peters MJ, Esko T, Yaghootkar H, Schurmann C, Kettunen J, et al.  
2237 Systematic identification of trans eQTLs as putative drivers of known disease associations.  
2238 *Nature genetics*. 2013;45(10):1238-43.
- 2239 51. Lloyd-Jones LR, Holloway A, McRae A, Yang J, Small K, Zhao J, et al. The Genetic  
2240 Architecture of Gene Expression in Peripheral Blood. *Am J Hum Genet*. 2017;100(2):371.
- 2241 52. Consortium G. Genetic effects on gene expression across human tissues. *Nature*.  
2242 2017;550(7675):204.
- 2243 53. McRae A, Marioni RE, Shah S, Yang J, Powell JE, Harris SE, et al. Identification of  
2244 55,000 Replicated DNA Methylation QTL. 2017.
- 2245 54. Ning Z, Lee Y, Joshi PK, Wilson JF, Pawitan Y, Shen X. A Selection Operator for  
2246 Summary Association Statistics Reveals Allelic Heterogeneity of Complex Traits. *Am J Hum*  
2247 *Genet*. 2017;101(6):903-12.
- 2248 55. Falconer DS, Mackay TFC. Introduction to quantitative genetics. 3rd ed. Burnt Mill,  
2249 Harlow, Essex, England  
2250 New York: Longman  
2251 Wiley; 1996. xii, 438 p. p.
- 2252 56. Finucane HK, Bulik-Sullivan B, Gusev A, Trynka G, Reshef Y, Loh PR, et al.  
2253 Partitioning heritability by functional annotation using genome-wide association summary  
2254 statistics. *Nat Genet*. 2015;47(11):1228-35.
- 2255 57. Bulik-Sullivan BK, Loh P-R, Finucane HK, Ripke S, Yang J, Consortium SWGotPG, et  
2256 al. LD Score regression distinguishes confounding from polygenicity in genome-wide  
2257 association studies. *Nature Genetics*. 2015;47(3):291.
- 2258 58. Mishra A, Macgregor S. VEGAS2: Software for More Flexible Gene-Based Testing.  
2259 *Twin Res Hum Genet*. 2015;18(1):86-91.

- 2260 59. Mishra A, MacGregor S. A Novel Approach for Pathway Analysis of GWAS Data  
2261 Highlights Role of BMP Signaling and Muscle Cell Differentiation in Colorectal Cancer  
2262 Susceptibility. *Twin Research and Human Genetics*. 2017;20(1):1-9.
- 2263 60. Pers TH, Karjalainen JM, Chan Y, Westra HJ, Wood AR, Yang J, et al. Biological  
2264 interpretation of genome-wide association studies using predicted gene functions. *Nat*  
2265 *Commun*. 2015;6:5890.
- 2266 61. Lamparter D, Marbach D, Rueedi R, Kutalik Z, Bergmann S. Fast and Rigorous  
2267 Computation of Gene and Pathway Scores from SNP-Based Summary Statistics. *PLoS*  
2268 *Comput Biol*. 2016;12(1):e1004714.
- 2269 62. Marouli E, Graff M, Medina-Gomez C, Lo KS, Wood AR, Kjaer TR, et al. Rare and low-  
2270 frequency coding variants alter human adult height. *Nature*. 2017;542(7640):186.
- 2271 63. Euesden J, Lewis CM, O'Reilly PF. PRSice: Polygenic Risk Score software.  
2272 *Bioinformatics*. 2015;31(9):1466-8.
- 2273 64. Sudlow C, Gallacher J, Allen N, Beral V, Burton P, Danesh J, et al. UK biobank: an  
2274 open access resource for identifying the causes of a wide range of complex diseases of middle  
2275 and old age. *PLoS Med*. 2015;12(3):e1001779.
- 2276 65. Haller T, Kals M, Esko T, Magi R, Fischer K. RegScan: a GWAS tool for quick  
2277 estimation of allele effects on continuous traits and their combinations. *Brief Bioinform*.  
2278 2015;16(1):39-44.
- 2279 66. Therneau TG, PM; Fleming, TR. Martingale-Based residuals for Survival Models.  
2280 *Biometrika*. 1990;77(1):147-60.
- 2281 67. Shen X, Wang X, Ning Z, Tsepilov Y, Shirali M, Smith BH, et al. Simple multi-trait  
2282 analysis identifies novel loci associated with growth and obesity measures. *bioRxiv*. 2015.
- 2283 68. McKay JD, Kaaks R, Johansson M, Biessy C, Wiklund F, Balter K, et al. Haplotype-  
2284 based analysis of common variation in the growth hormone receptor gene and prostate cancer  
2285 risk. *Cancer Epidemiol Biomarkers Prev*. 2007;16(1):169-73.
- 2286 69. Maciejewski H. Gene set analysis methods: statistical models and methodological  
2287 differences. *Briefings in Bioinformatics*. 2018;15(4):504-18.
- 2288 70. Leitsalu L, Haller T, Esko T, Tammesoo ML, Alavere H, Snieder H, et al. Cohort Profile:  
2289 Estonian Biobank of the Estonian Genome Center, University of Tartu. *Int J Epidemiol*.  
2290 2015;44(4):1137-47.
- 2291 71. GTEx Consortium. Human genomics. The Genotype-Tissue Expression (GTEx) pilot  
2292 analysis: multitissue gene regulation in humans. *Science*. 2015;348(6235):648-60.
- 2293 72. Liu J, Afroza H, Rader DJ, Jin W. Angiopoietin-like protein 3 inhibits lipoprotein lipase  
2294 activity through enhancing its cleavage by proprotein convertases. *J Biol Chem*.  
2295 2010;285(36):27561-70.
- 2296 73. Stawowy P, Fleck E. Proprotein convertases furin and PC5: targeting atherosclerosis  
2297 and restenosis at multiple levels. *J Mol Med (Berl)*. 2005;83(11):865-75.
- 2298 74. Bassi DE, Mahloogi H, Al-Saleem L, Lopez De Cicco R, Ridge JA, Klein-Szanto AJ.  
2299 Elevated furin expression in aggressive human head and neck tumors and tumor cell lines.  
2300 *Mol Carcinog*. 2001;31(4):224-32.
- 2301 75. Ma YC, Fan WJ, Rao SM, Gao L, Bei ZY, Xu ST. Effect of Furin inhibitor on lung  
2302 adenocarcinoma cell growth and metastasis. *Cancer Cell Int*. 2014;14:43.
- 2303 76. Greer PA, Kanda S, Smithgall TE. The contrasting oncogenic and tumor suppressor  
2304 roles of FES. *Front Biosci (Schol Ed)*. 2012;4:489-501.
- 2305 77. Popov N, Wanzel M, Madiredjo M, Zhang D, Beijersbergen R, Bernards R, et al. The  
2306 ubiquitin-specific protease USP28 is required for MYC stability. *Nat Cell Biol*. 2007;9(7):765-  
2307 74.
- 2308 78. Guo G, Xu Y, Gong M, Cao Y, An R. USP28 is a potential prognostic marker for bladder  
2309 cancer. *Tumour Biol*. 2014;35(5):4017-22.
- 2310 79. Zhang L, Xu B, Qiang Y, Huang H, Wang C, Li D, et al. Overexpression of  
2311 deubiquitinating enzyme USP28 promoted non-small cell lung cancer growth. *J Cell Mol Med*.  
2312 2015;19(4):799-805.

- 2313 80. Diefenbacher ME, Popov N, Blake SM, Schulein-Volk C, Nye E, Spencer-Dene B, et  
2314 al. The deubiquitinase USP28 controls intestinal homeostasis and promotes colorectal cancer.  
2315 *J Clin Invest*. 2014;124(8):3407-18.
- 2316 81. Diefenbacher ME, Chakraborty A, Blake SM, Mitter R, Popov N, Eilers M, et al. Usp28  
2317 counteracts Fbw7 in intestinal homeostasis and cancer. *Cancer Res*. 2015;75(7):1181-6.
- 2318 82. Law PJ, Berndt SI, Speedy HE, Camp NJ, Sava GP, Skibola CF, et al. Genome-wide  
2319 association analysis implicates dysregulation of immunity genes in chronic lymphocytic  
2320 leukaemia. *Nat Commun*. 2017;8:14175.
- 2321 83. Balendran N, Clough RL, Arguello JR, Barber R, Veal C, Jones AB, et al.  
2322 Characterization of the major susceptibility region for psoriasis at chromosome 6p21.3. *J*  
2323 *Invest Dermatol*. 1999;113(3):322-8.
- 2324 84. Nair RP, Stuart P, Henseler T, Jenisch S, Chia NVC, Westphal E, et al. Localization of  
2325 Psoriasis-Susceptibility Locus PSORS1 to a 60-kb Interval Telomeric to HLA-C. *The American*  
2326 *Journal of Human Genetics*. 2000;66(6):1833-44.
- 2327 85. Gelfand JM, Neimann AL, Shin DB, Wang X, Margolis DJ, Troxel AB. Risk of  
2328 myocardial infarction in patients with psoriasis. *Jama*. 2006;296(14):1735-41.
- 2329 86. Wang Y, Broderick P, Webb E, Wu X, Vijayakrishnan J, Matakidou A, et al. Common  
2330 5p15.33 and 6p21.33 variants influence lung cancer risk. *Nature Genetics*. 2008;40(12):1407.
- 2331 87. Skibola CF, Bracci PM, Halperin E, Conde L, Craig DW, Agana L, et al. Genetic  
2332 variants at 6p21.33 are associated with susceptibility to follicular lymphoma. *Nat Genet*.  
2333 2009;41(8):873-5.
- 2334 88. Chubb D, Weinhold N, Broderick P, Chen B, Johnson DC, Forsti A, et al. Common  
2335 variation at 3q26.2, 6p21.33, 17p11.2 and 22q13.1 influences multiple myeloma risk. *Nat*  
2336 *Genet*. 2013;45(10):1221-5.
- 2337 89. Kainu T, Juo SH, Desper R, Schaffer AA, Gillanders E, Rozenblum E, et al. Somatic  
2338 deletions in hereditary breast cancers implicate 13q21 as a putative novel breast cancer  
2339 susceptibility locus. *Proc Natl Acad Sci U S A*. 2000;97(17):9603-8.
- 2340 90. Lettre G, Palmer CD, Young T, Ejebe KG, Allayee H, Benjamin EJ, et al. Genome-  
2341 wide association study of coronary heart disease and its risk factors in 8,090 African  
2342 Americans: the NHLBI CARE Project. *PLoS Genet*. 2011;7(2):e1001300.
- 2343 91. Arvind P, Nair J, Jambunathan S, Kakkar VV, Shanker J. CELSR2-PSRC1-SORT1  
2344 gene expression and association with coronary artery disease and plasma lipid levels in an  
2345 Asian Indian cohort. *J Cardiol*. 2014;64(5):339-46.
- 2346 92. Zhou YJ, Hong SC, Yang Q, Yin RX, Cao XL, Chen WX. Association of variants in  
2347 CELSR2-PSRC1-SORT1 with risk of serum lipid traits, coronary artery disease and ischemic  
2348 stroke. *Int J Clin Exp Pathol*. 2015;8(8):9543-51.
- 2349 93. Klein MS, Connors KE, Shearer J, Vogel HJ, Hittel DS. Metabolomics reveals the sex-  
2350 specific effects of the SORT1 low-density lipoprotein cholesterol locus in healthy young adults.  
2351 *J Proteome Res*. 2014;13(11):5063-70.
- 2352 94. Walia GK, Gupta V, Aggarwal A, Asghar M, Dudbridge F, Timpson N, et al. Association  
2353 of common genetic variants with lipid traits in the Indian population. *PLoS One*.  
2354 2014;9(7):e101688.
- 2355 95. Zarrouk A, Vejux A, Mackrill J, O'Callaghan Y, Hammami M, O'Brien N, et al.  
2356 Involvement of oxysterols in age-related diseases and ageing processes. *Ageing Res Rev*.  
2357 2014;18:148-62.
- 2358 96. Goritz C, Mauch DH, Pfrieder FW. Multiple mechanisms mediate cholesterol-induced  
2359 synaptogenesis in a CNS neuron. *Mol Cell Neurosci*. 2005;29(2):190-201.
- 2360 97. Zhang J, Liu Q. Cholesterol metabolism and homeostasis in the brain. *Protein Cell*.  
2361 2015;6(4):254-64.
- 2362 98. Hayashi T, Ko JH, Strafella AP, Dagher A. Dorsolateral prefrontal and orbitofrontal  
2363 cortex interactions during self-control of cigarette craving. *Proc Natl Acad Sci U S A*.  
2364 2013;110(11):4422-7.
- 2365 99. Lowe CJ, Hall PA, Staines WR. The effects of continuous theta burst stimulation to the  
2366 left dorsolateral prefrontal cortex on executive function, food cravings, and snack food  
2367 consumption. *Psychosom Med*. 2014;76(7):503-11.

- 2368 100. Morrison JH, Baxter MG. The ageing cortical synapse: hallmarks and implications for  
2369 cognitive decline. *Nat Rev Neurosci.* 2012;13(4):240-50.  
2370 101. Peters MJ, Joehanes R, Pilling LC, Schurmann C, Conneely KN, Powell J, et al. The  
2371 transcriptional landscape of age in human peripheral blood. *Nature Communications.*  
2372 2015;6:8570.  
2373
